# Supplementary material
Source: Research Square preprint supplement (doi:10.21203/rs.3.rs-9705786/v1)
Supplement: Supplementary file 1 [file 637cfba276370e8b2445292f.xlsx]

## Sheet: Index
Index:
Table S1	Primers used in RT-qPCR.
Table S2	Differential expression analysis in the ISP-PMN-PD-MSCs vs the original PD-MSCs comparison.
Table S3	Gene ontology enrichment in DEGs in the ISP-PMN-PD-MSCs vs the original PD-MSCs comparison.
Table S4	Gene ontology depletion in DEGs in the ISP-PMN-PD-MSCs vs the original PD-MSCs comparison.

## Sheet: Table S1
Table S2. Primers used in RT-qPCR.
Target	Forward promer	Reverse primer
ACTB	TGCGTTGTTACAGGAAGTCCC	GCTATCACCTCCCCTGTGTG
C1ORF43	ACGCCTTTCAAGGGTGTACG	CAAAGACCCCTGTCCCATAGC
GAPDH	TGCACCACCAACTGCTTAGC	GGCATGGACTGTGGTCATGAG
EMC7	AAAGGAGGTAGTCAGGCCGT	GTTGCTTCACACGGTTTTCCA
RPL27	ACCGCTACCCCCGCAAAGTG	CCCGTCGGGCCTTGCGTTTA
PSMB4	CATTCCGTCCACTCCCGATT	CGAACTTAACGCCGAGGACT
MaFA	TTTGGACTAGCCGGGAGAGA	GGCTGGAATCCCACTGATGG
NGN3	TAAGAGCGAGTTGGACTGAGC	CGTACAAGCTGTGGTCCGCTAAT
PDX1	CCCTGGGTGACCACTAAACC	CACAGCCTCTACCTCGGAAC
NKX2.2	CAATGACAAGGAGACCCCGG	GAAAAGCACTCGCCGCTTTC
INS	ACGAGGCTTCTTCTACACACCC	TCCACAATGCCACGCTTCTGCA
GCK	CATCTCCGACTTCCTGGACAAG	TGGTCCAGTTGAGAAAGGATGCC
SST	ACCCAACCAGACGGAGAATGA	GCCGGGTTTGAGTTAGCAGA
GCG	CCAGAAGAGGTCGCCATTGT	GTCCCTGGCGGCAAAGATTAT

## Sheet: Table S2
Table S3. Differential expression analysis in the ISP-PMN-PD-MSCs vs the original PD-MSCs comparison.
ensembl_gene_id	symbol	log2fold	padj
ENSG00000000003	TSPAN6	0.887663	0.0779645
ENSG00000000419	DPM1	0.733765	0.106012
ENSG00000000457	SCYL3	-0.136746	0.881675
ENSG00000000460	FIRRM	-2.50396	0.00729937
ENSG00000000971	CFH	-1.09951	0.158103
ENSG00000001036	FUCA2	0.439273	0.689978
ENSG00000001084	GCLC	0.650526	0.478251
ENSG00000001167	NFYA	-1.24406	0.121789
ENSG00000001460	STPG1	-1.05807	0.0786427
ENSG00000001461	NIPAL3	-0.454925	0.683389
ENSG00000001497	LAS1L	-1.2002	0.515861
ENSG00000001617	SEMA3F	-1.10005	0.619399
ENSG00000001629	ANKIB1	-0.330703	0.542096
ENSG00000001630	CYP51A1	-0.309258	0.594588
ENSG00000001631	KRIT1	-0.683185	0.563078
ENSG00000002016	RAD52	-0.819666	0.270415
ENSG00000002330	BAD	-1.95126	0.000511046
ENSG00000002549	LAP3	0.741032	0.375184
ENSG00000002586	CD99	1.56329	0.00401359
ENSG00000002745	WNT16	4.81453	0.00108218
ENSG00000002746	HECW1	7.36887	4.42883e-06
ENSG00000002822	MAD1L1	0.232561	0.876746
ENSG00000002834	LASP1	-0.77351	0.0560335
ENSG00000002919	SNX11	0.452363	0.493591
ENSG00000003056	M6PR	1.31067	0.00214133
ENSG00000003393	ALS2	0.476624	0.636399
ENSG00000003402	CFLAR	0.14461	0.788035
ENSG00000003436	TFPI	0.175132	0.915624
ENSG00000003509	NDUFAF7	-0.0685611	0.944027
ENSG00000003756	RBM5	0.597264	0.443559
ENSG00000003989	SLC7A2	-3.3884	0.155248
ENSG00000004059	ARF5	-0.713341	0.217807
ENSG00000004139	SARM1	-0.297686	0.656392
ENSG00000004142	POLDIP2	0.236672	0.625605
ENSG00000004399	PLXND1	-0.577978	0.59235
ENSG00000004455	AK2	0.0138628	0.983909
ENSG00000004478	FKBP4	0.20573	0.815144
ENSG00000004487	KDM1A	-0.296504	0.705179
ENSG00000004534	RBM6	-0.156477	0.850994
ENSG00000004660	CAMKK1	1.58715	0.195562
ENSG00000004700	RECQL	0.412436	0.551795
ENSG00000004766	VPS50	0.0096205	0.987314
ENSG00000004776	HSPB6	-2.5904	4.73697e-11
ENSG00000004777	ARHGAP33	-1.52215	0.463704
ENSG00000004779	NDUFAB1	0.567863	0.134483
ENSG00000004799	PDK4	6.50164	7.38558e-06
ENSG00000004864	SLC25A13	0.489474	0.380083
ENSG00000004866	ST7	0.0110589	0.989798
ENSG00000004897	CDC27	-0.359182	0.38325
ENSG00000004961	HCCS	0.617826	0.160659
ENSG00000004975	DVL2	-0.142045	0.88805
ENSG00000005007	UPF1	-0.488562	0.582147
ENSG00000005020	SKAP2	-0.126288	0.851694
ENSG00000005022	SLC25A5	-1.50245	0.000544118
ENSG00000005059	MCUB	-1.21331	0.0732496
ENSG00000005075	POLR2J	-0.760233	0.156965
ENSG00000005100	DHX33	-0.115668	0.890749
ENSG00000005108	THSD7A	4.7687	5.24678e-06
ENSG00000005156	LIG3	-0.161945	0.881538
ENSG00000005175	RPAP3	0.435493	0.464029
ENSG00000005189	REXO5	-1.2391	0.188716
ENSG00000005194	CIAPIN1	0.289198	0.668788
ENSG00000005206	SPPL2B	-1.08374	0.0761091
ENSG00000005238	ATOSB	-1.24707	0.00177676
ENSG00000005243	COPZ2	-0.369885	0.548032
ENSG00000005302	MSL3	0.678433	0.578731
ENSG00000005339	CREBBP	-1.16731	0.00201342
ENSG00000005436	GCFC2	-0.238656	0.811987
ENSG00000005448	WDR54	-0.481698	0.735303
ENSG00000005469	CROT	-0.357774	0.623634
ENSG00000005483	KMT2E	0.528	0.370695
ENSG00000005486	RHBDD2	0.80153	0.116706
ENSG00000005700	IBTK	-0.0652534	0.888388
ENSG00000005801	ZNF195	1.24794	0.0656555
ENSG00000005810	MYCBP2	1.21851	0.0143876
ENSG00000005812	FBXL3	-0.413752	0.589514
ENSG00000005882	PDK2	-0.481384	0.426158
ENSG00000005884	ITGA3	-0.454965	0.686699
ENSG00000005889	ZFX	-0.647348	0.421273
ENSG00000005893	LAMP2	-0.146899	0.807116
ENSG00000006007	GDE1	0.768781	0.0421618
ENSG00000006015	REX1BD	-0.353676	0.648126
ENSG00000006025	OSBPL7	-2.19799	0.0174169
ENSG00000006042	TMEM98	-1.17278	0.00174152
ENSG00000006062	MAP3K14	0.876637	0.385649
ENSG00000006118	TMEM132A	4.80739	1.00769e-09
ENSG00000006125	AP2B1	-0.204815	0.734668
ENSG00000006194	ZNF263	-0.0855434	0.881328
ENSG00000006282	SPATA20	-0.93759	0.01481
ENSG00000006327	TNFRSF12A	-1.72726	3.18938e-06
ENSG00000006451	RALA	1.3934	0.000535544
ENSG00000006453	BAIAP2L1	-2.34811	0.168317
ENSG00000006459	KDM7A	-0.128668	0.933787
ENSG00000006468	ETV1	1.49006	0.106895
ENSG00000006534	ALDH3B1	-2.08192	4.35216e-05
ENSG00000006576	PHTF2	-0.954149	0.0343727
ENSG00000006607	FARP2	-0.0538512	0.965618
ENSG00000006625	GGCT	0.539123	0.294883
ENSG00000006634	DBF4	-0.263613	0.821268
ENSG00000006638	TBXA2R	-0.301248	0.839839
ENSG00000006652	IFRD1	0.113255	0.886749
ENSG00000006695	COX10	1.15158	0.0507421
ENSG00000006704	GTF2IRD1	0.206444	0.818681
ENSG00000006712	PAF1	-0.3084	0.66795
ENSG00000006715	VPS41	-0.495425	0.384404
ENSG00000006740	ARHGAP44	4.5444	5.18784e-05
ENSG00000006744	ELAC2	0.340855	0.542013
ENSG00000006747	SCIN	-3.03151	0.00952033
ENSG00000006756	ARSD	0.432256	0.746193
ENSG00000006757	PNPLA4	2.03273	0.35071
ENSG00000006831	ADIPOR2	0.539396	0.130626
ENSG00000007047	MARK4	-1.39074	0.0236676
ENSG00000007080	CCDC124	-0.983165	0.00414357
ENSG00000007168	PAFAH1B1	0.219758	0.814365
ENSG00000007202	BLTP2	-0.923255	0.0427922
ENSG00000007255	TRAPPC6A	-1.90287	0.119819
ENSG00000007341	ST7L	1.14061	0.0414431
ENSG00000007376	RPUSD1	-1.15419	0.0403168
ENSG00000007384	RHBDF1	-0.903192	0.0929273
ENSG00000007392	LUC7L	-0.140417	0.856422
ENSG00000007520	TSR3	-0.470513	0.389092
ENSG00000007541	PIGQ	-0.171825	0.830261
ENSG00000007545	CRAMP1	-1.39356	0.0102572
ENSG00000007866	TEAD3	-0.503843	0.340022
ENSG00000007923	DNAJC11	0.0457738	0.959978
ENSG00000007944	MYLIP	2.11834	0.0646244
ENSG00000008018	PSMB1	0.452253	0.242364
ENSG00000008083	JARID2	1.73893	0.036413
ENSG00000008086	CDKL5	-0.0923966	0.970799
ENSG00000008118	CAMK1G	0.251113
ENSG00000008128	CDK11A	-1.00533	0.0349822
ENSG00000008130	NADK	-0.938343	0.0245442
ENSG00000008256	CYTH3	-1.68893	0.00015593
ENSG00000008282	SYPL1	-0.403631	0.508254
ENSG00000008283	CYB561	-1.36773	0.065726
ENSG00000008294	SPAG9	-0.712181	0.238825
ENSG00000008311	AASS	0.698263	0.588261
ENSG00000008324	SS18L2	1.20565	0.0500496
ENSG00000008382	MPND	-0.216326	0.886894
ENSG00000008394	MGST1	-1.55233	0.0448888
ENSG00000008405	CRY1	-0.09395	0.87999
ENSG00000008441	NFIX	-2.05594	0.0085623
ENSG00000008513	ST3GAL1	2.73282	9.94697e-13
ENSG00000008517	IL32	3.18909	5.72358e-07
ENSG00000008710	PKD1	-0.801324	0.341009
ENSG00000008838	MED24	-0.346223	0.440474
ENSG00000008853	RHOBTB2	-0.389375	0.738722
ENSG00000008869	HEATR5B	-0.330762	0.666985
ENSG00000008952	SEC62	1.03133	0.00120494
ENSG00000008988	RPS20	-0.550472	0.118116
ENSG00000009307	CSDE1	-1.13992	0.00429219
ENSG00000009335	UBE3C	-0.0989403	0.859742
ENSG00000009413	REV3L	0.412427	0.609711
ENSG00000009780	FAM76A	-0.754887	0.191523
ENSG00000009830	POMT2	1.53141	0.49029
ENSG00000009844	VTA1	0.0524296	0.948307
ENSG00000009954	BAZ1B	-0.572208	0.289688
ENSG00000010017	RANBP9	-0.432304	0.431855
ENSG00000010072	SPRTN	0.632477	0.34305
ENSG00000010165	METTL13	0.958114	0.112842
ENSG00000010219	DYRK4	0.742311	0.243421
ENSG00000010244	ZNF207	-0.0266366	0.956291
ENSG00000010256	UQCRC1	-0.2998	0.604297
ENSG00000010270	STARD3NL	-0.834778	0.0499758
ENSG00000010278	CD9	-0.995447	0.177062
ENSG00000010292	NCAPD2	-1.81836	0.00310464
ENSG00000010295	IFFO1	-0.623771	0.339141
ENSG00000010318	PHF7	1.25689	0.222997
ENSG00000010319	SEMA3G	5.17946	0.000527212
ENSG00000010322	NISCH	0.4922	0.570952
ENSG00000010361	FUZ	-0.0480239	0.95606
ENSG00000010404	IDS	0.0143074	0.989709
ENSG00000010438	PRSS3	-3.5043	0.00133699
ENSG00000010539	ZNF200	0.145924	0.861264
ENSG00000010610	CD4	-0.15716	0.964682
ENSG00000010626	LRRC23	-0.902892	0.499299
ENSG00000010704	HFE	-0.733069	0.535887
ENSG00000010803	SCMH1	-0.837756	0.307776
ENSG00000010810	FYN	-0.368302	0.680666
ENSG00000010818	HIVEP2	-1.06408	0.449391
ENSG00000011007	ELOA	-0.0701453	0.919869
ENSG00000011009	LYPLA2	-1.08365	0.073503
ENSG00000011021	CLCN6	-0.640886	0.353567
ENSG00000011028	MRC2	-0.457059	0.504711
ENSG00000011052	NME1-NME2	1.4203	0.294391
ENSG00000011105	TSPAN9	1.35154	0.0770894
ENSG00000011114	BTBD7	0.0376365	0.957428
ENSG00000011132	APBA3	0.779866	0.357691
ENSG00000011143	MKS1	-0.29517	0.81177
ENSG00000011198	ABHD5	0.783822	0.783683
ENSG00000011201	ANOS1	4.87577	0.155266
ENSG00000011243	AKAP8L	0.187056	0.840308
ENSG00000011258	MBTD1	0.263146	0.813965
ENSG00000011260	UTP18	-0.530282	0.444542
ENSG00000011275	RNF216	-0.837993	0.0296209
ENSG00000011295	TTC19	0.374866	0.592812
ENSG00000011304	PTBP1	-0.822195	0.195737
ENSG00000011332	DPF1	-1.17707	0.584074
ENSG00000011347	SYT7	-0.217365	0.911967
ENSG00000011405	PIK3C2A	4.25685	0.13631
ENSG00000011422	PLAUR	-0.256042	0.890749
ENSG00000011426	ANLN	-3.80799	7.73946e-06
ENSG00000011451	WIZ	-0.178155	0.797629
ENSG00000011454	RABGAP1	-1.37244	0.00179691
ENSG00000011465	DCN	-1.986	0.0311188
ENSG00000011478	QPCTL	1.05379	0.030871
ENSG00000011485	PPP5C	-0.353593	0.478084
ENSG00000011566	MAP4K3	-0.83347	0.0646767
ENSG00000011638	LDAF1	-1.10894	0.159745
ENSG00000012048	BRCA1	-1.78701	0.0183475
ENSG00000012061	ERCC1	0.364364	0.517917
ENSG00000012174	MBTPS2	0.622849	0.0658119
ENSG00000012211	PRICKLE3	-0.537587	0.581595
ENSG00000012660	ELOVL5	-0.789841	0.286225
ENSG00000012822	CALCOCO1	-0.632244	0.365652
ENSG00000012963	UBR7	-0.880456	0.0381933
ENSG00000012983	MAP4K5	-1.75632	0.430954
ENSG00000013016	EHD3	-1.03356	0.2113
ENSG00000013275	PSMC4	0.134241	0.871731
ENSG00000013288	MAN2B2	0.163522	0.824279
ENSG00000013297	CLDN11	-0.896667	0.793392
ENSG00000013306	SLC25A39	-0.295908	0.673662
ENSG00000013364	MVP	-0.701613	0.17092
ENSG00000013374	NUB1	-1.02737	0.0465861
ENSG00000013375	PGM3	1.51282	0.259684
ENSG00000013392	RWDD2A	1.19644	0.0472622
ENSG00000013441	CLK1	0.981661	0.155002
ENSG00000013503	POLR3B	0.919523	0.0303994
ENSG00000013523	ANGEL1	1.45243	0.113551
ENSG00000013561	RNF14	-0.716764	0.0633874
ENSG00000013563	DNASE1L1	-1.05329	0.509638
ENSG00000013573	DDX11	-2.29141	0.0138686
ENSG00000013583	HEBP1	-0.805164	0.117291
ENSG00000013588	GPRC5A	-5.15771	0.000149893
ENSG00000013619	MAMLD1	1.20233	0.313918
ENSG00000013810	TACC3	-4.16138	0.00172143
ENSG00000014123	UFL1	0.592195	0.203854
ENSG00000014138	POLA2	-2.43076	0.00402895
ENSG00000014164	ZC3H3	-0.349641	0.721118
ENSG00000014216	CAPN1	-0.609922	0.16109
ENSG00000014257	ACP3	11.092
ENSG00000014641	MDH1	0.415019	0.42277
ENSG00000014824	SLC30A9	-0.144534	0.748337
ENSG00000014914	MTMR11	-2.03949	0.00186652
ENSG00000014919	COX15	0.611743	0.132373
ENSG00000015153	YAF2	2.11332	8.53913e-06
ENSG00000015171	ZMYND11	-1.58115	0.415967
ENSG00000015475	BID	0.600448	0.715995
ENSG00000015479	MATR3	-0.804597	0.0105614
ENSG00000015532	XYLT2	-0.00337243	0.996835
ENSG00000015568	RGPD5	1.07328	0.606635
ENSG00000015676	NUDCD3	-1.4434	0.000733016
ENSG00000016082	ISL1	3.91605	0.00216159
ENSG00000016864	GLT8D1	0.13137	0.90096
ENSG00000017260	ATP2C1	-0.16828	0.829085
ENSG00000017427	IGF1	7.53506	6.03079e-07
ENSG00000017483	SLC38A5	0.223679	0.964133
ENSG00000017797	RALBP1	-1.05303	0.000854645
ENSG00000018189	RUFY3	0.898564	0.0843658
ENSG00000018236	CNTN1	7.09128	5.95093e-12
ENSG00000018408	WWTR1	0.928029	0.0315702
ENSG00000018510	AGPS	1.11145	0.588098
ENSG00000018699	TTC27	-0.421733	0.545539
ENSG00000018869	ZNF582	-1.29336	0.501077
ENSG00000019144	PHLDB1	-0.417051	0.401265
ENSG00000019485	PRDM11	0.253369	0.902204
ENSG00000019549	SNAI2	-0.217622	0.769567
ENSG00000019991	HGF	0.493391	0.485742
ENSG00000019995	ZRANB1	-0.430734	0.351397
ENSG00000020129	NCDN	0.876763	0.0480453
ENSG00000020181	ADGRA2	-1.67475	0.0296478
ENSG00000020256	ZFP64	-0.360203	0.728433
ENSG00000020426	MNAT1	0.00684246	0.993599
ENSG00000020577	SAMD4A	-0.847035	0.0901015
ENSG00000020922	MRE11	-1.41099	0.0121329
ENSG00000021355	SERPINB1	-1.50217	0.00506778
ENSG00000021645	NRXN3	-2.66075
ENSG00000021762	OSBPL5	-1.54201	0.00705843
ENSG00000021776	AQR	0.387995	0.612331
ENSG00000022267	FHL1	-0.839259	0.398864
ENSG00000022277	RTF2	-0.112933	0.883304
ENSG00000022567	SLC45A4	-0.328338	0.876627
ENSG00000022840	RNF10	0.866812	0.0702795
ENSG00000022976	ZNF839	-0.578376	0.508254
ENSG00000023041	ZDHHC6	-0.732289	0.301899
ENSG00000023171	GRAMD1B	-0.363474	0.861476
ENSG00000023191	RNH1	-0.239666	0.753247
ENSG00000023228	NDUFS1	0.651482	0.0964724
ENSG00000023287	RB1CC1	0.0690638	0.930828
ENSG00000023318	ERP44	-0.00491081	0.994777
ENSG00000023330	ALAS1	0.905404	0.0707177
ENSG00000023445	BIRC3	-1.15985	0.733329
ENSG00000023516	AKAP11	-0.29656	0.725888
ENSG00000023572	GLRX2	-0.567317	0.410395
ENSG00000023608	SNAPC1	-0.97439	0.0429855
ENSG00000023697	DERA	0.227116	0.728297
ENSG00000023734	STRAP	0.367692	0.480991
ENSG00000023902	PLEKHO1	-0.692969	0.0742569
ENSG00000023909	GCLM	-0.343606	0.657764
ENSG00000024048	UBR2	0.144783	0.800438
ENSG00000024422	EHD2	-1.72726	7.71983e-08
ENSG00000024526	DEPDC1	-3.1767	0.00405543
ENSG00000024862	CCDC28A	0.81801	0.262189
ENSG00000025156	HSF2	-0.278989	0.778901
ENSG00000025293	PHF20	-1.01604	0.0253536
ENSG00000025434	NR1H3	0.150454	0.927096
ENSG00000025708	TYMP	-1.3686	0.483611
ENSG00000025770	NCAPH2	-0.406927	0.702294
ENSG00000025772	TOMM34	-0.844215	0.212436
ENSG00000025796	SEC63	0.276908	0.503641
ENSG00000025800	KPNA6	0.717657	0.136191
ENSG00000026025	VIM	-0.850417	0.0864852
ENSG00000026036	RTEL1-TNFRSF6B	-1.38392	0.0857371
ENSG00000026103	FAS	2.40697	0.000693976
ENSG00000026297	RNASET2	-0.383721	0.827357
ENSG00000026508	CD44	-0.0392471	0.971751
ENSG00000026559	KCNG1	0.546717	0.720541
ENSG00000026652	AGPAT4	-0.382352	0.767692
ENSG00000026950	BTN3A1	0.465687	0.456079
ENSG00000027001	MIPEP	1.86025	0.00138663
ENSG00000027075	PRKCH	0.234934	0.890749
ENSG00000027697	IFNGR1	0.291067	0.79836
ENSG00000027847	B4GALT7	0.528561	0.292919
ENSG00000028116	VRK2	-1.55039	0.0023377
ENSG00000028137	TNFRSF1B	-0.426866	0.755768
ENSG00000028203	VEZT	0.384827	0.558028
ENSG00000028277	POU2F2	3.31942	0.00892287
ENSG00000028310	BRD9	-1.27837	0.0442869
ENSG00000028528	SNX1	0.40828	0.484761
ENSG00000028839	TBPL1	0.75597	0.206759
ENSG00000029153	BMAL2	-1.6302	0.121652
ENSG00000029363	BCLAF1	-1.00362	0.00214467
ENSG00000029364	SLC39A9	1.80042	2.05173e-13
ENSG00000029639	TFB1M	0.187573	0.858554
ENSG00000029725	RABEP1	0.0285426	0.972716
ENSG00000029993	HMGB3	-1.13293	0.256656
ENSG00000030066	NUP160	0.475101	0.392991
ENSG00000030110	BAK1	1.32695	9.49681e-05
ENSG00000030304	MUSK	2.2516	0.308776
ENSG00000030419	IKZF2	-0.485113	0.70551
ENSG00000030582	GRN	-0.139372	0.843886
ENSG00000031003	FAM13B	-0.79909	0.0134983
ENSG00000031081	ARHGAP31	-0.813295	0.0385456
ENSG00000031691	CENPQ	-1.83525	0.03719
ENSG00000031698	SARS1	-0.550274	0.200814
ENSG00000031823	RANBP3	-0.568807	0.36087
ENSG00000032219	ARID4A	1.11999	0.0274688
ENSG00000032389	EIPR1	-0.0207883	0.979448
ENSG00000032444	PNPLA6	0.562968	0.324536
ENSG00000032742	IFT88	0.311619	0.791225
ENSG00000033011	ALG1	-0.233347	0.790324
ENSG00000033030	ZCCHC8	-0.802571	0.116063
ENSG00000033050	ABCF2	-1.1503	0.0761154
ENSG00000033100	CHPF2	0.835836	0.0669192
ENSG00000033170	FUT8	-0.163919	0.90214
ENSG00000033178	UBA6	0.0635116	0.952863
ENSG00000033327	GAB2	-0.0698411	0.951703
ENSG00000033627	ATP6V0A1	2.50204	3.42206e-14
ENSG00000033800	PIAS1	0.215899	0.790324
ENSG00000033867	SLC4A7	0.352487	0.767692
ENSG00000034053	APBA2	-0.733388	0.558416
ENSG00000034152	MAP2K3	-1.50653	0.0285159
ENSG00000034510	TMSB10	-0.329489	0.53969
ENSG00000034533	ASTE1	0.610585	0.446922
ENSG00000034677	RNF19A	-0.15176	0.847456
ENSG00000034693	PEX3	0.552347	0.497544
ENSG00000034713	GABARAPL2	1.21167	0.0150762
ENSG00000035115	SH3YL1	-0.343507	0.742184
ENSG00000035141	FAM136A	-0.930951	0.0886935
ENSG00000035403	VCL	-0.0215823	0.970799
ENSG00000035499	DEPDC1B	-1.48971	0.172768
ENSG00000035681	NSMAF	-0.146161	0.813405
ENSG00000035687	ADSS2	-1.08775	0.0501558
ENSG00000035862	TIMP2	-1.90186	2.25433e-10
ENSG00000035928	RFC1	-0.331948	0.499965
ENSG00000036054	TBC1D23	0.794484	0.267944
ENSG00000036257	CUL3	1.67008	9.83543e-09
ENSG00000036549	ZZZ3	-0.507965	0.32704
ENSG00000036672	USP2	6.33894	6.97573e-06
ENSG00000037042	TUBG2	0.275207	0.736968
ENSG00000037241	RPL26L1	-0.0683287	0.929159
ENSG00000037474	NSUN2	-0.160125	0.784821
ENSG00000037637	FBXO42	0.525633	0.357691
ENSG00000037749	MFAP3	-0.0502122	0.94596
ENSG00000037757	MRI1	-0.645753	0.2113
ENSG00000037897	METTL1	0.0555637	0.947727
ENSG00000037965	HOXC8	-1.11357	0.712777
ENSG00000038002	AGA	1.63841	0.0325945
ENSG00000038210	PI4K2B	-0.108793	0.851326
ENSG00000038219	BOD1L1	0.469535	0.214603
ENSG00000038274	MAT2B	0.395219	0.767818
ENSG00000038358	EDC4	0.0283575	0.976374
ENSG00000038382	TRIO	-0.550494	0.0687797
ENSG00000038427	VCAN	-0.943086	0.00529412
ENSG00000038532	CLEC16A	1.50981	0.0669556
ENSG00000038945	MSR1	-3.31215	0.0265531
ENSG00000039123	MTREX	-0.517066	0.453569
ENSG00000039319	ZFYVE16	0.210872	0.783949
ENSG00000039523	RIPOR1	-0.949221	0.164098
ENSG00000039560	RAI14	-1.73098	0.00459395
ENSG00000039650	PNKP	-0.262996	0.750139
ENSG00000040199	PHLPP2	0.387514	0.656467
ENSG00000040275	SPDL1	-0.907228	0.0231601
ENSG00000040341	STAU2	1.13357	0.0129061
ENSG00000040487	SLC66A1	0.574128	0.42894
ENSG00000040531	CTNS	0.287542	0.900395
ENSG00000040633	PHF23	1.238	0.00264928
ENSG00000040933	INPP4A	-1.02837	0.117228
ENSG00000041353	RAB27B	-2.92687	0.0695324
ENSG00000041357	PSMA4	0.179821	0.784087
ENSG00000041802	LSG1	0.106292	0.899281
ENSG00000041880	PARP3	-0.635748	0.62077
ENSG00000041982	TNC	-0.756869	0.812444
ENSG00000041988	THAP3	0.45573	0.538683
ENSG00000042088	TDP1	0.885908	0.0437398
ENSG00000042286	AIFM2	-0.91056	0.221115
ENSG00000042317	SPATA7	0.020134	0.985044
ENSG00000042429	MED17	0.916892	0.698416
ENSG00000042445	RETSAT	0.791096	0.0301137
ENSG00000042493	CAPG	-0.0828421	0.973887
ENSG00000042753	AP2S1	-1.07029	0.0123311
ENSG00000043093	DCUN1D1	-0.480494	0.519554
ENSG00000043143	JADE2	-0.612007	0.770606
ENSG00000043514	TRIT1	-0.134451	0.853883
ENSG00000044090	CUL7	-0.946165	0.296133
ENSG00000044115	CTNNA1	-0.369757	0.512341
ENSG00000044446	PHKA2	-1.14504	0.131169
ENSG00000044459	CNTLN	-0.0491882	0.955275
ENSG00000044524	EPHA3	2.87166	0.0550549
ENSG00000044574	HSPA5	0.316743	0.524072
ENSG00000046604	DSG2	-4.02138	0.32116
ENSG00000046647	GEMIN8	0.139418	0.908486
ENSG00000046651	OFD1	0.505872	0.5056
ENSG00000046653	GPM6B	4.44911	0.000690172
ENSG00000047056	WDR37	1.47735	0.421925
ENSG00000047188	YTHDC2	0.478268	0.357506
ENSG00000047230	CTPS2	-0.900961	0.260054
ENSG00000047249	ATP6V1H	0.956514	0.00310464
ENSG00000047315	POLR2B	0.100224	0.86287
ENSG00000047346	ATOSA	1.05729	0.121171
ENSG00000047410	TPR	-0.256204	0.587892
ENSG00000047578	KATNIP	-0.667389	0.502974
ENSG00000047579	DTNBP1	0.616855	0.439082
ENSG00000047621	FERRY3	0.848162	0.196053
ENSG00000047634	SCML1	0.786863	0.136364
ENSG00000047644	WWC3	-0.118963	0.883799
ENSG00000047648	ARHGAP6	4.5429	6.79175e-07
ENSG00000047849	MAP4	0.000155544	0.999934
ENSG00000047932	GOPC	-0.188989	0.801032
ENSG00000048028	USP28	-1.0932	0.100837
ENSG00000048052	HDAC9	0.172959	0.917253
ENSG00000048140	TSPAN17	-1.12436	0.0560259
ENSG00000048162	NOP16	0.422013	0.54841
ENSG00000048342	CC2D2A	-1.17471	0.181271
ENSG00000048392	RRM2B	2.16499	3.53345e-06
ENSG00000048405	ZNF800	0.476671	0.46797
ENSG00000048471	SNX29	-0.414579	0.530577
ENSG00000048544	MRPS10	0.825444	0.177644
ENSG00000048649	RSF1	0.227767	0.772219
ENSG00000048707	VPS13D	0.338053	0.550853
ENSG00000048828	FAM120A	-2.7395	1.51842e-07
ENSG00000048991	R3HDM1	-0.475813	0.503641
ENSG00000049192	ADAMTS6	-2.79764	5.4583e-05
ENSG00000049239	H6PD	-0.653709	0.50518
ENSG00000049245	VAMP3	-0.0754323	0.885816
ENSG00000049246	PER3	-1.21978	0.204344
ENSG00000049249	TNFRSF9	6.10047	9.92009e-07
ENSG00000049323	LTBP1	-1.41811	0.0161969
ENSG00000049449	RCN1	0.746342	0.0442595
ENSG00000049540	ELN	-3.79723	0.0807477
ENSG00000049541	RFC2	-1.6842	0.0270185
ENSG00000049618	ARID1B	0.0388128	0.959122
ENSG00000049656	CLPTM1L	2.79171	0.000194629
ENSG00000049759	NEDD4L	0.684724	0.51587
ENSG00000049769	PPP1R3F	0.779786	0.668479
ENSG00000049860	HEXB	1.61938	0.00174152
ENSG00000049883	PTCD2	0.409363	0.513729
ENSG00000050130	JKAMP	0.96489	0.0107647
ENSG00000050165	DKK3	0.61832	0.57269
ENSG00000050327	ARHGEF5	-1.35514	0.714543
ENSG00000050393	MCUR1	1.49282	0.0123717
ENSG00000050405	LIMA1	0.0333685	0.959879
ENSG00000050426	LETMD1	-0.257452	0.661186
ENSG00000050438	SLC4A8	-2.08196	0.119724
ENSG00000050628	PTGER3	-0.986246	0.69321
ENSG00000050748	MAPK9	-1.23644	0.015603
ENSG00000050820	BCAR1	-0.788726	0.0613031
ENSG00000051009	FHIP1B	-0.623543	0.210366
ENSG00000051108	HERPUD1	-0.141888	0.879576
ENSG00000051128	HOMER3	-1.21085	0.156381
ENSG00000051180	RAD51	-2.62715	0.000187524
ENSG00000051341	POLQ	-2.36549	0.0975217
ENSG00000051382	PIK3CB	0.0945425	0.909234
ENSG00000051523	CYBA	-2.55909	0.0761911
ENSG00000051596	THOC3	0.940877	0.231605
ENSG00000051620	HEBP2	-0.000884365	0.999082
ENSG00000051825	MPHOSPH9	-0.30299	0.746492
ENSG00000052126	PLEKHA5	0.480742	0.559541
ENSG00000052723	SIKE1	1.2726	0.0480453
ENSG00000052749	RRP12	1.37581	0.0322997
ENSG00000052795	FNIP2	-0.290183	0.694018
ENSG00000052802	MSMO1	0.204718	0.820209
ENSG00000052841	TTC17	0.627089	0.200512
ENSG00000053254	FOXN3	-0.348406	0.581406
ENSG00000053371	AKR7A2	0.0576381	0.938712
ENSG00000053372	MRTO4	0.249839	0.688405
ENSG00000053501	USE1	-0.156652	0.880183
ENSG00000053770	AP5M1	0.879526	0.0924564
ENSG00000053900	ANAPC4	-0.91083	0.0859344
ENSG00000054116	TRAPPC3	0.261781	0.510522
ENSG00000054118	THRAP3	-0.609377	0.175632
ENSG00000054148	PHPT1	0.999372	0.00955126
ENSG00000054267	ARID4B	-0.0387927	0.961983
ENSG00000054277	OPN3	-1.01649	0.299759
ENSG00000054282	SDCCAG8	-0.333122	0.52398
ENSG00000054392	HHAT	-0.34441	0.757383
ENSG00000054523	KIF1B	0.654062	0.147883
ENSG00000054611	TBC1D22A	-0.122116	0.84823
ENSG00000054654	SYNE2	-0.813345	0.580083
ENSG00000054793	ATP9A	-3.04343	6.2545e-12
ENSG00000054965	FAM168A	0.427459	0.483202
ENSG00000054967	RELT	0.49431	0.697602
ENSG00000054983	GALC	-0.451593	0.53872
ENSG00000055044	NOP58	0.379344	0.641652
ENSG00000055070	SZRD1	-0.383638	0.28986
ENSG00000055130	CUL1	0.162231	0.782222
ENSG00000055147	FAM114A2	0.385919	0.485742
ENSG00000055163	CYFIP2	3.34555	3.34084e-05
ENSG00000055208	TAB2	0.601193	0.191843
ENSG00000055211	GINM1	-0.142637	0.800492
ENSG00000055332	EIF2AK2	0.109194	0.94596
ENSG00000055483	USP36	-0.826603	0.388732
ENSG00000055609	KMT2C	0.335793	0.746193
ENSG00000055813	CCDC85A	-2.93934	0.134761
ENSG00000055917	PUM2	0.0990851	0.878209
ENSG00000055950	MRPL43	-0.155206	0.737629
ENSG00000056050	HPF1	0.169487	0.793654
ENSG00000056097	ZFR	0.596838	0.0646054
ENSG00000056277	ZNF280C	1.18419	0.161384
ENSG00000056558	TRAF1	0.499889	0.770606
ENSG00000056586	RC3H2	-0.526387	0.305162
ENSG00000056972	TRAF3IP2	-0.759686	0.670869
ENSG00000057019	DCBLD2	0.9672	0.159745
ENSG00000057252	SOAT1	-2.02148	0.0209828
ENSG00000057608	GDI2	-0.211961	0.618613
ENSG00000057657	PRDM1	1.38667	0.431126
ENSG00000057663	ATG5	-0.164251	0.87999
ENSG00000057704	TMCC3	8.018	0.000138947
ENSG00000057757	PITHD1	0.790649	0.265125
ENSG00000057935	MTA3	0.66721	0.138049
ENSG00000058056	USP13	-2.89679
ENSG00000058063	ATP11B	-0.402372	0.635759
ENSG00000058085	LAMC2	-1.59186	0.0395241
ENSG00000058091	CDK14	-1.16146	0.0197839
ENSG00000058262	SEC61A1	0.0237751	0.953995
ENSG00000058272	PPP1R12A	1.10707	0.0653112
ENSG00000058453	CROCC	-1.69671	0.00171493
ENSG00000058600	POLR3E	0.659325	0.21953
ENSG00000058668	ATP2B4	-0.125071	0.861394
ENSG00000058673	ZC3H11A	0.10653	0.931669
ENSG00000058729	RIOK2	0.822136	0.102357
ENSG00000058799	YIPF1	-0.109679	0.866388
ENSG00000058804	NDC1	-1.03974	0.114731
ENSG00000058866	DGKG	-1.92335	0.153072
ENSG00000059122	FLYWCH1	-0.558566	0.469705
ENSG00000059145	UNKL	0.459826	0.59965
ENSG00000059378	PARP12	-0.15367	0.916973
ENSG00000059573	ALDH18A1	-1.02753	0.000644744
ENSG00000059588	TARBP1	-0.98256	0.0505414
ENSG00000059691	GATB	2.35629	8.01873e-06
ENSG00000059728	MXD1	0.474528	0.718366
ENSG00000059758	CDK17	0.465186	0.431126
ENSG00000059769	DNAJC25	0.501945	0.404508
ENSG00000059804	SLC2A3	0.679696	0.232541
ENSG00000060069	CTDP1	-0.0561039	0.949581
ENSG00000060138	YBX3	0.485617	0.357942
ENSG00000060140	STYK1	-2.2672	0.145802
ENSG00000060237	WNK1	-1.57962	0.108332
ENSG00000060339	CCAR1	1.14591	0.000116618
ENSG00000060491	OGFR	-0.25215	0.778349
ENSG00000060642	PIGV	0.169435	0.918021
ENSG00000060656	PTPRU	6.45609	5.17875e-05
ENSG00000060688	SNRNP40	0.12328	0.869241
ENSG00000060718	COL11A1	-1.13891	0.456821
ENSG00000060762	MPC1	0.589312	0.384404
ENSG00000060971	ACAA1	0.00454207	0.996883
ENSG00000060982	BCAT1	-0.384764	0.287909
ENSG00000061273	HDAC7	-1.37288	0.000770964
ENSG00000061337	LZTS1	2.47656	0.0728677
ENSG00000061455	PRDM6	1.1102	0.576403
ENSG00000061656	SPAG4	-0.36063	0.877124
ENSG00000061676	NCKAP1	-0.350877	0.442402
ENSG00000061794	MRPS35	-0.114591	0.819607
ENSG00000061918	GUCY1B1	2.42832	0.0116511
ENSG00000061936	SFSWAP	0.789294	0.149123
ENSG00000061938	TNK2	-1.49523	0.631999
ENSG00000061987	MON2	-0.555558	0.170221
ENSG00000062194	GPBP1	0.50076	0.167222
ENSG00000062370	ZNF112	-0.190867	0.860648
ENSG00000062485	CS	-0.921226	0.0328848
ENSG00000062582	MRPS24	-0.646539	0.149844
ENSG00000062598	ELMO2	0.975318	0.0082489
ENSG00000062650	WAPL	-0.0952577	0.881328
ENSG00000062716	VMP1	1.27778	0.0658047
ENSG00000062725	APPBP2	0.877911	0.0275684
ENSG00000062822	POLD1	-1.53853	0.14442
ENSG00000063046	EIF4B	-0.610443	0.198712
ENSG00000063169	BICRA	-0.859778	0.302811
ENSG00000063176	SPHK2	0.114011	0.921815
ENSG00000063177	RPL18	-0.38117	0.248526
ENSG00000063180	CA11	0.389516	0.860151
ENSG00000063241	ISOC2	-0.168925	0.817528
ENSG00000063244	U2AF2	-0.305645	0.547973
ENSG00000063245	EPN1	-1.51696	0.011122
ENSG00000063322	MED29	-0.24163	0.618738
ENSG00000063438	AHRR	-0.0213026	0.993599
ENSG00000063587	ZNF275	8.95269	7.38211e-10
ENSG00000063601	MTMR1	0.141762	0.881328
ENSG00000063660	GPC1	0.175177	0.837019
ENSG00000063761	ADCK1	-0.341086	0.778582
ENSG00000063854	HAGH	-0.171132	0.881921
ENSG00000063978	RNF4	-0.60583	0.132059
ENSG00000064012	CASP8	-0.00736925	0.995005
ENSG00000064042	LIMCH1	4.78682	4.53611e-06
ENSG00000064102	INTS13	0.663815	0.168317
ENSG00000064115	TM7SF3	1.01704	0.00730059
ENSG00000064199	SPA17	-0.871297	0.384447
ENSG00000064225	ST3GAL6	0.3116	0.827224
ENSG00000064313	TAF2	-0.316367	0.746193
ENSG00000064393	HIPK2	-0.406628	0.655147
ENSG00000064419	TNPO3	-0.363314	0.481455
ENSG00000064489		-0.72535	0.742667
ENSG00000064490	RFXANK	0.344228	0.461904
ENSG00000064545	TMEM161A	-0.513926	0.476364
ENSG00000064601	CTSA	0.32957	0.814746
ENSG00000064607	SUGP2	0.638359	0.237166
ENSG00000064651	SLC12A2	2.71339	0.000403401
ENSG00000064652	SNX24	-0.446953	0.462399
ENSG00000064666	CNN2	-1.30355	7.41021e-06
ENSG00000064687	ABCA7	1.7286	0.222499
ENSG00000064692	SNCAIP	4.5709	4.74465e-12
ENSG00000064703	DDX20	-0.445331	0.849677
ENSG00000064726	BTBD1	0.353723	0.666985
ENSG00000064763	FAR2	-1.35873	0.0659332
ENSG00000064932	SBNO2	-1.18445	0.0185359
ENSG00000064933	PMS1	0.533262	0.391058
ENSG00000064961	HMG20B	-1.28671	0.0047493
ENSG00000064989	CALCRL	4.04469	0.00203819
ENSG00000064995	TAF11	0.56708	0.410116
ENSG00000064999	ANKS1A	-0.0903016	0.921327
ENSG00000065000	AP3D1	0.39893	0.685429
ENSG00000065029	ZNF76	-0.460905	0.509484
ENSG00000065054	NHERF2	-2.20176	0.000291431
ENSG00000065060	BLTP3A	0.124038	0.912967
ENSG00000065135	GNAI3	0.548788	0.140697
ENSG00000065150	IPO5	-0.463179	0.396333
ENSG00000065154	OAT	-1.00165	0.0101175
ENSG00000065183	WDR3	0.2738	0.795727
ENSG00000065243	PKN2	-0.6245	0.29286
ENSG00000065268	WDR18	0.577408	0.402168
ENSG00000065308	TRAM2	-0.849193	0.139381
ENSG00000065328	MCM10	-3.27322	0.0115696
ENSG00000065357	DGKA	0.894222	0.256261
ENSG00000065413	ANKRD44	0.795488	0.781249
ENSG00000065427	KARS1	-0.428676	0.384345
ENSG00000065457	ADAT1	0.941254	0.123929
ENSG00000065485	PDIA5	1.7835	0.000430427
ENSG00000065491	TBC1D22B	-0.819412	0.23928
ENSG00000065518	NDUFB4	0.044938	0.929157
ENSG00000065526	SPEN	-0.549833	0.679817
ENSG00000065534	MYLK	-0.163434	0.949793
ENSG00000065548	ZC3H15	0.0335125	0.959001
ENSG00000065559	MAP2K4	-0.974635	0.131041
ENSG00000065600	PACC1	0.655833	0.27707
ENSG00000065613	SLK	0.266747	0.66503
ENSG00000065615	CYB5R4	-0.383079	0.701545
ENSG00000065665	SEC61A2	-0.792719	0.289692
ENSG00000065802	ASB1	0.0422453	0.967618
ENSG00000065809	FAM107B	-1.15595	0.131717
ENSG00000065833	ME1	0.333483	0.706409
ENSG00000065882	TBC1D1	-0.0374788	0.971004
ENSG00000065883	CDK13	-1.09648	0.038905
ENSG00000065911	MTHFD2	-1.32347	0.00398701
ENSG00000065923	SLC9A7	0.46214	0.637327
ENSG00000065970	FOXJ2	-0.688031	0.111916
ENSG00000065978	YBX1	-0.440995	0.374225
ENSG00000065989	PDE4A	-1.79435	0.0985844
ENSG00000066027	PPP2R5A	0.528808	0.344609
ENSG00000066044	ELAVL1	0.0578319	0.92401
ENSG00000066084	DIP2B	0.214565	0.813965
ENSG00000066117	SMARCD1	0.624491	0.269824
ENSG00000066135	KDM4A	-0.574926	0.155266
ENSG00000066136	NFYC	-0.0410257	0.951571
ENSG00000066279	ASPM	-4.31833	5.45347e-06
ENSG00000066322	ELOVL1	-0.806318	0.0214763
ENSG00000066379	POLR1H	-0.89592	0.155694
ENSG00000066427	ATXN3	-1.07357	0.367675
ENSG00000066455	GOLGA5	0.117557	0.86287
ENSG00000066557	LRRC40	-1.11677	0.00639202
ENSG00000066583	ISOC1	2.10039	6.82723e-05
ENSG00000066629	EML1	1.71298	0.00846431
ENSG00000066651	TRMT11	-0.280456	0.725149
ENSG00000066654	THUMPD1	-0.594844	0.177644
ENSG00000066697	MSANTD3	0.609377	0.182824
ENSG00000066739	ATG2B	-0.257452	0.826094
ENSG00000066777	ARFGEF1	1.08844	0.00118469
ENSG00000066827	ZFAT	0.913554	0.144207
ENSG00000066855	MTFR1	1.3279	0.0375932
ENSG00000066926	FECH	-2.2546	0.0193427
ENSG00000066933	MYO9A	0.14588	0.820354
ENSG00000067057	PFKP	-1.24712	0.0108542
ENSG00000067064	IDI1	-1.55733	0.195608
ENSG00000067066	SP100	-0.28024	0.819625
ENSG00000067082	KLF6	-0.435321	0.390275
ENSG00000067113	PLPP1	1.15185	0.219394
ENSG00000067141	NEO1	-1.47099	0.301899
ENSG00000067167	TRAM1	-0.412371	0.487277
ENSG00000067177	PHKA1	1.38983	0.506085
ENSG00000067182	TNFRSF1A	-0.769888	0.0810243
ENSG00000067191	CACNB1	0.612653	0.530499
ENSG00000067208	EVI5	0.844279
ENSG00000067221	STOML1	0.406194	0.549059
ENSG00000067225	PKM	-1.00846	0.0444643
ENSG00000067248	DHX29	0.218631	0.718458
ENSG00000067334	DNTTIP2	0.449179	0.37042
ENSG00000067365	METTL22	1.73189	0.000710221
ENSG00000067369	TP53BP1	1.53155	0.00153115
ENSG00000067445	TRO	0.407958	0.817492
ENSG00000067533	RRP15	-0.0787931	0.937044
ENSG00000067560	RHOA	-0.627061	0.279509
ENSG00000067596	DHX8	1.16378	0.00217386
ENSG00000067704	IARS2	-0.591602	0.0802475
ENSG00000067715	SYT1	0.666552	0.67313
ENSG00000067798	NAV3	-0.16133	0.856239
ENSG00000067829	IDH3G	0.474403	0.276443
ENSG00000067836	ROGDI	-0.224285	0.850332
ENSG00000067842	ATP2B3	6.24243	0.00266774
ENSG00000067900	ROCK1	-0.59433	0.238247
ENSG00000067955	CBFB	-1.2832	0.0613031
ENSG00000068001	HYAL2	-0.324888	0.686176
ENSG00000068024	HDAC4	-0.755537	0.474517
ENSG00000068028	RASSF1	-0.908134	0.0560172
ENSG00000068079	IFI35	-0.809322	0.575705
ENSG00000068097	HEATR6	-0.673469	0.410377
ENSG00000068120	COASY	0.519672	0.216709
ENSG00000068137	PLEKHH3	0.864552	0.0489495
ENSG00000068305	MEF2A	-0.0828155	0.938712
ENSG00000068308	OTUD5	0.0942056	0.898442
ENSG00000068323	TFE3	-0.810824	0.0037321
ENSG00000068354	TBC1D25	-1.06047	0.0064108
ENSG00000068366	ACSL4	-1.28225	0.377105
ENSG00000068383	INPP5A	-2.07698	1.66207e-06
ENSG00000068394	GPKOW	0.0796191	0.912731
ENSG00000068400	GRIPAP1	1.31291	0.510961
ENSG00000068438	FTSJ1	-0.916213	0.0260398
ENSG00000068489	PRR11	-3.0421	0.0123042
ENSG00000068615	REEP1	6.85316	0.000465024
ENSG00000068650	ATP11A	-1.86763	0.186238
ENSG00000068654	POLR1A	-0.142007	0.912859
ENSG00000068697	LAPTM4A	0.555185	0.238181
ENSG00000068724	TTC7A	-2.15222	3.87157e-07
ENSG00000068745	IP6K2	1.28281	0.0208883
ENSG00000068784	SRBD1	0.0548773	0.944108
ENSG00000068796	KIF2A	-1.16178	0.340022
ENSG00000068878	PSME4	0.393967	0.603981
ENSG00000068885	IFT80	-0.333593	0.703843
ENSG00000068903	SIRT2	-0.449791	0.231413
ENSG00000068912	ERLEC1	-0.0806791	0.910611
ENSG00000068971	PPP2R5B	-0.169489	0.868231
ENSG00000069020	MAST4	2.31501	4.75378e-05
ENSG00000069248	NUP133	0.983406	0.17092
ENSG00000069275	NUCKS1	-0.218153	0.657415
ENSG00000069329	VPS35	0.215682	0.814124
ENSG00000069345	DNAJA2	0.317506	0.421088
ENSG00000069399	BCL3	-0.688287	0.463509
ENSG00000069424	KCNAB2	2.98796	0.0947899
ENSG00000069431	ABCC9	0.257934	0.91515
ENSG00000069482	GAL	8.6289	3.84072e-06
ENSG00000069493	CLEC2D	-0.169566	0.928078
ENSG00000069509	FUNDC1	0.186093	0.822942
ENSG00000069667	RORA	1.44003	0.122715
ENSG00000069702	TGFBR3	-2.18162	0.0070054
ENSG00000069849	ATP1B3	0.647014	0.272087
ENSG00000069869	NEDD4	-0.190108	0.915899
ENSG00000069943	PIGB	0.169019	0.867988
ENSG00000069956	MAPK6	-0.392373	0.790249
ENSG00000069966	GNB5	-1.13437	0.27184
ENSG00000069974	RAB27A	1.13872	0.0184892
ENSG00000069998	HDHD5	-1.41265	0.000569123
ENSG00000070010	UFD1	-0.279429	0.620606
ENSG00000070018	LRP6	-0.574363	0.135856
ENSG00000070047	PHRF1	-0.505903	0.514409
ENSG00000070061	ELP1	-0.0738501	0.917253
ENSG00000070081	NUCB2	-0.279276	0.618116
ENSG00000070087	PFN2	0.416244	0.484951
ENSG00000070159	PTPN3	-0.222488	0.946134
ENSG00000070190	DAPP1	11.3813	4.01986e-14
ENSG00000070214	SLC44A1	1.26154	0.000472774
ENSG00000070269	TMEM260	0.196727	0.807844
ENSG00000070366	SMG6	-0.811754	0.298184
ENSG00000070367	EXOC5	-0.337902	0.570524
ENSG00000070371	CLTCL1	-0.279977	0.752601
ENSG00000070404	FSTL3	-2.19694	0.00433317
ENSG00000070413	DGCR2	-0.217399	0.695657
ENSG00000070423	RNF126	-0.30833	0.653451
ENSG00000070444	MNT	0.660894	0.36754
ENSG00000070476	ZXDC	-0.123966	0.879485
ENSG00000070495	JMJD6	-0.17437	0.835964
ENSG00000070501	POLB	-0.107883	0.912859
ENSG00000070540	WIPI1	1.22866	0.00452984
ENSG00000070601	FRMPD1	8.56586	2.38767e-07
ENSG00000070610	GBA2	0.457203	0.542317
ENSG00000070614	NDST1	-1.36865	0.00500514
ENSG00000070669	ASNS	-1.4231	0.0822468
ENSG00000070718	AP3M2	-1.21612	0.00353935
ENSG00000070756	PABPC1	-0.458848	0.624551
ENSG00000070759	TESK2	-0.64267	0.682639
ENSG00000070761	CFAP20	1.22676	0.00744369
ENSG00000070770	CSNK2A2	0.120625	0.855479
ENSG00000070778	PTPN21	-1.62924	0.00257059
ENSG00000070785	EIF2B3	0.627793	0.404094
ENSG00000070814	TCOF1	-0.0816716	0.94802
ENSG00000070831	CDC42	0.463164	0.384874
ENSG00000070882	OSBPL3	0.865859	0.0316699
ENSG00000070950	RAD18	-1.76665	0.000375792
ENSG00000070961	ATP2B1	0.698204	0.344757
ENSG00000071051	NCK2	0.191125	0.860255
ENSG00000071054	MAP4K4	0.832167	0.135486
ENSG00000071082	RPL31	-0.65907	0.16816
ENSG00000071127	WDR1	-1.32812	7.06785e-05
ENSG00000071189	SNX13	0.625279	0.282571
ENSG00000071205	ARHGAP10	-0.700894	0.157813
ENSG00000071242	RPS6KA2	-1.1208	0.00182759
ENSG00000071243	ING3	0.324932	0.682205
ENSG00000071246	VASH1	0.161915	0.928809
ENSG00000071282	LMCD1	-1.76833	0.118601
ENSG00000071462	BUD23	0.839095	0.122991
ENSG00000071537	SEL1L	-0.310638	0.544215
ENSG00000071539	TRIP13	-2.85217	0.00226401
ENSG00000071553	ATP6AP1	1.21778	0.000501636
ENSG00000071564	TCF3	-0.591629	0.391058
ENSG00000071575	TRIB2	0.70478	0.118515
ENSG00000071626	DAZAP1	-1.37097	0.000547236
ENSG00000071655	MBD3	-0.792368	0.0921748
ENSG00000071794	HLTF	-1.92006	0.000184017
ENSG00000071859	FAM50A	-0.740829	0.0891336
ENSG00000071889	FAM3A	-1.3764	0.026356
ENSG00000071894	CPSF1	0.379958	0.460981
ENSG00000071967	CYBRD1	-2.39593	0.00225216
ENSG00000071994	PDCD2	0.658623	0.0584625
ENSG00000072041	SLC6A15	4.65344	0.000958209
ENSG00000072042	RDH11	0.851139	0.0245399
ENSG00000072062	PRKACA	0.174575	0.88868
ENSG00000072071	ADGRL1	2.83949	0.0523738
ENSG00000072110	ACTN1	-1.95543	2.82682e-05
ENSG00000072121	ZFYVE26	0.957717	0.0453622
ENSG00000072133	RPS6KA6	-1.27843	0.099892
ENSG00000072134	EPN2	-0.884215	0.172487
ENSG00000072135	PTPN18	0.248048	0.797822
ENSG00000072163	LIMS2	-1.22969	0.334839
ENSG00000072195	SPEG	-0.499326	0.690866
ENSG00000072201	LNX1	3.38163	0.0245785
ENSG00000072210	ALDH3A2	1.03528	0.168442
ENSG00000072274	TFRC	-0.752358	0.390498
ENSG00000072310	SREBF1	0.157711	0.900577
ENSG00000072364	AFF4	-0.277963	0.560699
ENSG00000072401	UBE2D1	-1.07945	0.0610483
ENSG00000072415	PALS1	0.721248	0.128978
ENSG00000072422	RHOBTB1	-1.28058	0.044536
ENSG00000072501	SMC1A	-1.13249	0.0271401
ENSG00000072506	HSD17B10	0.617096	0.352979
ENSG00000072518	MARK2	0.273011	0.703295
ENSG00000072571	HMMR	-3.51958	0.00571866
ENSG00000072609	CHFR	-0.0149849	0.987544
ENSG00000072657	TRHDE	0.21155	0.90858
ENSG00000072682	P4HA2	2.25636	7.68544e-07
ENSG00000072736	NFATC3	0.120199	0.839296
ENSG00000072756	TRNT1	-0.285598	0.785013
ENSG00000072778	ACADVL	0.650735	0.139381
ENSG00000072786	STK10	-0.193039	0.871939
ENSG00000072803	FBXW11	0.392052	0.344582
ENSG00000072840	EVC	0.690863	0.479569
ENSG00000072849	DERL2	0.842889	0.0896621
ENSG00000072858	SIDT1	1.4303	0.653451
ENSG00000072864	NDE1	-1.79796	0.00205991
ENSG00000072952	IRAG1	-0.910986	0.540199
ENSG00000072958	AP1M1	-0.731509	0.0202745
ENSG00000073008	PVR	-0.633726	0.134483
ENSG00000073050	XRCC1	-0.0324749	0.975513
ENSG00000073060	SCARB1	-2.06198	0.354394
ENSG00000073111	MCM2	-2.19041	0.0158028
ENSG00000073169	SELENOO	-0.821423	0.295385
ENSG00000073331	ALPK1	-0.327592	0.837525
ENSG00000073417	PDE8A	-0.103011	0.912859
ENSG00000073464	CLCN4	1.99729	0.0560217
ENSG00000073536	NLE1	-0.854506	0.21802
ENSG00000073578	SDHA	0.0103379	0.98239
ENSG00000073584	SMARCE1	-0.803558	0.0166085
ENSG00000073605	GSDMB	0.596188	0.619399
ENSG00000073614	KDM5A	0.906626	0.0849789
ENSG00000073711	PPP2R3A	-0.435305	0.519904
ENSG00000073712	FERMT2	0.306678	0.697556
ENSG00000073756	PTGS2	-3.40829	0.0257868
ENSG00000073792	IGF2BP2	-0.0908433	0.928952
ENSG00000073803	MAP3K13	0.797625	0.337618
ENSG00000073849	ST6GAL1	-2.59256	0.0634619
ENSG00000073910	FRY	1.51151	0.506229
ENSG00000073921	PICALM	-0.739497	0.0281361
ENSG00000073969	NSF	-4.12885	0.00551929
ENSG00000074047	GLI2	-2.46176	0.000164678
ENSG00000074054	CLASP1	1.30145	0.00104017
ENSG00000074071	MRPS34	0.657236	0.113745
ENSG00000074181	NOTCH3	0.0681061	0.966761
ENSG00000074201	CLNS1A	0.0541226	0.936424
ENSG00000074219	TEAD2	-1.59046	0.00266739
ENSG00000074266	EED	1.76511	0.0519992
ENSG00000074319	TSG101	0.0613823	0.925416
ENSG00000074356	NCBP3	0.0842129	0.916738
ENSG00000074410	CA12	3.6717	0.0110662
ENSG00000074416	MGLL	-0.768504	0.188657
ENSG00000074527	NTN4	-2.13883	0.127386
ENSG00000074582	BCS1L	-0.289741	0.76691
ENSG00000074590	NUAK1	-0.444488	0.610893
ENSG00000074603	DPP8	0.525991	0.432469
ENSG00000074621	SLC24A1	0.193035	0.907853
ENSG00000074657	ZNF532	-0.370731	0.470039
ENSG00000074695	LMAN1	0.0983455	0.851932
ENSG00000074696	HACD3	-0.0541577	0.941364
ENSG00000074755	ZZEF1	-0.820004	0.130161
ENSG00000074800	ENO1	-0.914792	0.0676245
ENSG00000074842	MYDGF	0.389642	0.497866
ENSG00000074855	ANO8	-0.758028	0.407039
ENSG00000074935	TUBE1	-0.749505	0.309257
ENSG00000074964	ARHGEF10L	0.498328	0.569271
ENSG00000075089	ACTR6	-0.282684	0.700227
ENSG00000075131	TIPIN	0.276441	0.818681
ENSG00000075142	SRI	-0.409574	0.484761
ENSG00000075151	EIF4G3	-0.414403	0.448442
ENSG00000075188	NUP37	-1.13508	0.0442595
ENSG00000075213	SEMA3A	1.77146	0.397969
ENSG00000075218	GTSE1	-3.16093	0.00244648
ENSG00000075223	SEMA3C	-1.6355	0.0718121
ENSG00000075234	TTC38	-0.0337719	0.971224
ENSG00000075239	ACAT1	-1.15621	0.0688504
ENSG00000075240	GRAMD4	-1.75796	0.0609067
ENSG00000075292	ZNF638	0.264227	0.549059
ENSG00000075303	SLC25A40	-1.15388	0.138349
ENSG00000075336	TIMM21	1.71508	0.00395548
ENSG00000075391	RASAL2	-1.70852	3.03384e-05
ENSG00000075399	VPS9D1	0.275036	0.664041
ENSG00000075407	ZNF37A	0.849763	0.174783
ENSG00000075413	MARK3	0.85588	0.188657
ENSG00000075415	SLC25A3	-0.471402	0.118833
ENSG00000075420	FNDC3B	0.383131	0.374927
ENSG00000075426	FOSL2	-0.370969	0.543265
ENSG00000075539	FRYL	-0.697405	0.153278
ENSG00000075568	TMEM131	0.454035	0.466142
ENSG00000075618	FSCN1	-0.557087	0.305162
ENSG00000075624	ACTB	1.80628	0.00899891
ENSG00000075643	MOCOS	2.06932	0.00222588
ENSG00000075651	PLD1	1.92743	2.61093e-05
ENSG00000075711	DLG1	0.473174	0.69053
ENSG00000075785	RAB7A	-0.291781	0.67253
ENSG00000075790	BCAP29	0.435373	0.584524
ENSG00000075826	SEC31B	1.1165	0.346281
ENSG00000075856	SART3	-0.196931	0.811987
ENSG00000075914	EXOSC7	0.818332	0.213985
ENSG00000075945	KIFAP3	-0.219219	0.730646
ENSG00000075975	MKRN2	0.256207	0.735735
ENSG00000076003	MCM6	-1.03553	0.120208
ENSG00000076043	REXO2	0.845144	0.0300264
ENSG00000076053	RBM7	-0.187027	0.815471
ENSG00000076067	RBMS2	-2.41172	6.84697e-14
ENSG00000076108	BAZ2A	-0.629488	0.508254
ENSG00000076201	PTPN23	0.490383	0.369295
ENSG00000076242	MLH1	-0.284263	0.765506
ENSG00000076248	UNG	0.100246	0.908773
ENSG00000076321	KLHL20	-0.231824	0.76314
ENSG00000076351	SLC46A1	-0.275669	0.906816
ENSG00000076356	PLXNA2	2.96741	9.3223e-05
ENSG00000076382	SPAG5	-2.49531	0.00470305
ENSG00000076513	ANKRD13A	1.00015	0.0086661
ENSG00000076555	ACACB	0.282443	0.860102
ENSG00000076604	TRAF4	0.301937	0.636399
ENSG00000076641	PAG1	0.726992	0.304501
ENSG00000076650	GPATCH1	-0.0811443	0.944478
ENSG00000076685	NT5C2	-1.94253	1.39857e-05
ENSG00000076706	MCAM	0.869746	0.584214
ENSG00000076716	GPC4	2.32456	0.561598
ENSG00000076924	XAB2	0.398189	0.505496
ENSG00000076928	ARHGEF1	-0.299986	0.780872
ENSG00000076984	MAP2K7	-0.710802	0.230928
ENSG00000077044	DGKD	-1.45582	0.222997
ENSG00000077063	CTTNBP2	-0.266863	0.929852
ENSG00000077092	RARB	5.70796	0.00235107
ENSG00000077097	TOP2B	0.519205	0.489339
ENSG00000077147	TM9SF3	0.00639888	0.992098
ENSG00000077150	NFKB2	0.764446	0.63787
ENSG00000077157	PPP1R12B	0.994808	0.501278
ENSG00000077232	DNAJC10	-1.15924	0.0453622
ENSG00000077235	GTF3C1	2.61374	7.99668e-08
ENSG00000077238	IL4R	-1.60372	0.00383321
ENSG00000077254	USP33	-0.373196	0.482491
ENSG00000077312	SNRPA	-0.771912	0.155909
ENSG00000077348	EXOSC5	-0.978652	0.279373
ENSG00000077380	DYNC1I2	0.644985	0.11078
ENSG00000077454	LRCH4	-0.796345	0.337069
ENSG00000077458	FAM76B	-1.19634	0.0938321
ENSG00000077463	SIRT6	-0.305513	0.665723
ENSG00000077514	POLD3	-0.674601	0.460525
ENSG00000077549	CAPZB	0.192575	0.670487
ENSG00000077585	GPR137B	3.69608	3.92464e-13
ENSG00000077616	NAALAD2	1.54077	0.438167
ENSG00000077684	JADE1	1.14534	0.00776064
ENSG00000077713	SLC25A43	-0.896829	0.20144
ENSG00000077721	UBE2A	0.0481787	0.93194
ENSG00000077782	FGFR1	-0.999136	0.438214
ENSG00000077942	FBLN1	-0.202179	0.966465
ENSG00000077943	ITGA8	-1.20316	0.549514
ENSG00000078018	MAP2	3.565	1.32511e-07
ENSG00000078043	PIAS2	0.838973	0.206357
ENSG00000078053	AMPH	1.51177	0.0143596
ENSG00000078061	ARAF	-0.148621	0.879485
ENSG00000078070	MCCC1	0.486547	0.482825
ENSG00000078098	FAP	-1.65514	0.0157258
ENSG00000078124	ACER3	1.5183	0.0346018
ENSG00000078140	UBE2K	0.246949	0.606501
ENSG00000078142	PIK3C3	0.422959	0.509638
ENSG00000078177	N4BP2	-0.0606559	0.957996
ENSG00000078237	TIGAR	1.34391	0.00134579
ENSG00000078246	TULP3	-0.715909	0.200704
ENSG00000078269	SYNJ2	-2.34208	4.04167e-05
ENSG00000078304	PPP2R5C	-0.817234	0.0148675
ENSG00000078369	GNB1	-1.14586	0.0141581
ENSG00000078401	EDN1	-3.36018	1.87803e-13
ENSG00000078403	MLLT10	-0.228053	0.730172
ENSG00000078487	ZCWPW1	0.470352	0.830261
ENSG00000078618	NRDC	-0.264491	0.598295
ENSG00000078668	VDAC3	0.377128	0.631033
ENSG00000078674	PCM1	-0.0151964	0.980045
ENSG00000078699	CBFA2T2	2.61358	7.42677e-14
ENSG00000078747	ITCH	1.20853	0.101219
ENSG00000078804	TP53INP2	-0.41899	0.539448
ENSG00000078808	SDF4	-0.209336	0.731671
ENSG00000078902	TOLLIP	-0.302077	0.668023
ENSG00000078967	UBE2D4	-0.636107	0.521315
ENSG00000079102	RUNX1T1	1.7388	0.0779645
ENSG00000079134	THOC1	1.50491	3.51777e-05
ENSG00000079150	FKBP7	0.948167	0.235975
ENSG00000079156	OSBPL6	0.579116	0.424772
ENSG00000079246	XRCC5	0.579406	0.119819
ENSG00000079257	LXN	-2.48473	0.150545
ENSG00000079277	MKNK1	-0.65469	0.408426
ENSG00000079308	TNS1	-1.50769	0.098887
ENSG00000079313	REXO1	-1.10425	0.0874324
ENSG00000079332	SAR1A	0.621544	0.151413
ENSG00000079335	CDC14A	-0.534352	0.737269
ENSG00000079337	RAPGEF3	0.808028	0.53652
ENSG00000079387	SENP1	-0.703053	0.271044
ENSG00000079432	CIC	-0.312504	0.676602
ENSG00000079435	LIPE	-0.926549	0.586144
ENSG00000079459	FDFT1	-0.679613	0.201342
ENSG00000079462	PAFAH1B3	-1.32746	0.212564
ENSG00000079482	OPHN1	-1.07811	0.20579
ENSG00000079616	KIF22	-1.5202	0.0309105
ENSG00000079691	CARMIL1	-1.3272	0.130626
ENSG00000079739	PGM1	-0.628543	0.302811
ENSG00000079785	DDX1	0.1945	0.649122
ENSG00000079805	DNM2	-0.820541	0.0461521
ENSG00000079819	EPB41L2	-1.36053	0.0129927
ENSG00000079841	RIMS1	-0.98616	0.288504
ENSG00000079931	MOXD1	4.14209	9.27712e-08
ENSG00000079950	STX7	-0.325308	0.486974
ENSG00000079974	RABL2B	0.362851	0.80258
ENSG00000079999	KEAP1	0.0320832	0.972716
ENSG00000080031	PTPRH	-3.44129	0.136626
ENSG00000080189	SLC35C2	0.549111	0.201711
ENSG00000080200	CRYBG3	2.86379	1.31414e-10
ENSG00000080298	RFX3	0.971379	0.267155
ENSG00000080345	RIF1	-1.37914	0.000290879
ENSG00000080371	RAB21	0.282221	0.622383
ENSG00000080493	SLC4A4	-0.614987	0.403718
ENSG00000080503	SMARCA2	1.45818	5.47812e-09
ENSG00000080546	SESN1	2.56429	6.20399e-05
ENSG00000080561	MID2	0.618427	0.73178
ENSG00000080573	COL5A3	0.0759518	0.959879
ENSG00000080603	SRCAP	-0.742339	0.446728
ENSG00000080608	PUM3	1.01014	0.0614433
ENSG00000080644	CHRNA3	11.9767	6.41624e-13
ENSG00000080802	CNOT4	0.498399	0.418915
ENSG00000080815	PSEN1	-0.958437	0.0609067
ENSG00000080822	CLDND1	0.950556	0.158357
ENSG00000080823	MOK	-0.966184	0.427179
ENSG00000080824	HSP90AA1	0.385749	0.549908
ENSG00000080839	RBL1	-2.66326	0.00443925
ENSG00000080845	DLGAP4	-0.535655	0.209508
ENSG00000080947	CROCCP3	0.504357	0.805162
ENSG00000080986	NDC80	-3.18614	0.000224963
ENSG00000081014	AP4E1	-0.478864	0.458849
ENSG00000081019	RSBN1	-0.493588	0.559117
ENSG00000081026	MAGI3	-0.427153	0.557638
ENSG00000081059	TCF7	-1.21548	0.545731
ENSG00000081087	OSTM1	0.908754	0.157872
ENSG00000081154	PCNP	0.280162	0.671558
ENSG00000081177	EXD2	-1.57057	0.275404
ENSG00000081181	ARG2	4.03222	0.000564974
ENSG00000081189	MEF2C	0.104728	0.925725
ENSG00000081307	UBA5	1.03303	0.00699583
ENSG00000081320	STK17B	-0.212935	0.87245
ENSG00000081377	CDC14B	1.29024	0.12561
ENSG00000081386	ZNF510	-0.38161	0.702732
ENSG00000081665	ZNF506	0.498105	0.718547
ENSG00000081692	JMJD4	-0.0461273	0.94638
ENSG00000081721	DUSP12	0.51226	0.384404
ENSG00000081760	AACS	-0.580292	0.30258
ENSG00000081791	DELE1	-0.535643	0.390512
ENSG00000081803	CADPS2	-0.759962	0.305085
ENSG00000081853	PCDHGA2	-0.508092	0.67454
ENSG00000081870	IFT25	-1.09028	0.18568
ENSG00000081913	PHLPP1	-0.234631	0.881328
ENSG00000082014	SMARCD3	-1.3095	0.0299142
ENSG00000082068	WDR70	0.445489	0.528151
ENSG00000082126	MPP4	-2.18398	0.156908
ENSG00000082146	STRADB	1.73603	0.00173827
ENSG00000082153	BZW1	-0.406135	0.620606
ENSG00000082196	C1QTNF3	2.66384	0.0878114
ENSG00000082213	C5orf22	0.21976	0.830261
ENSG00000082258	CCNT2	0.614226	0.264801
ENSG00000082269	FAM135A	1.77932	3.19746e-05
ENSG00000082293	COL19A1	3.68107	0.0100852
ENSG00000082438	COBLL1	-0.0531368	0.972716
ENSG00000082458	DLG3	-0.320027	0.830511
ENSG00000082482	KCNK2	-2.0444	1.45808e-05
ENSG00000082497	SERTAD4	-4.81821	7.50855e-14
ENSG00000082512	TRAF5	0.298868	0.815046
ENSG00000082515	MRPL22	0.292878	0.60242
ENSG00000082516	GEMIN5	0.248389	0.808441
ENSG00000082641	NFE2L1	-0.242311	0.665608
ENSG00000082701	GSK3B	0.132634	0.861264
ENSG00000082781	ITGB5	-1.84629	5.73417e-07
ENSG00000082805	ERC1	-0.988161	0.0508482
ENSG00000082898	XPO1	-0.79421	0.48352
ENSG00000082996	RNF13	0.673587	0.186851
ENSG00000083093	PALB2	-0.411095	0.861394
ENSG00000083097	DOP1A	-0.09462	0.936424
ENSG00000083099	LYRM2	1.50652	0.000320845
ENSG00000083123	BCKDHB	0.475475	0.413562
ENSG00000083168	KAT6A	-0.577008	0.390404
ENSG00000083223	TUT7	0.579998	0.291975
ENSG00000083290	ULK2	-2.80443	0.0889583
ENSG00000083312	TNPO1	-0.777212	0.165567
ENSG00000083444	PLOD1	-0.0459916	0.954953
ENSG00000083457	ITGAE	0.00837316	0.994255
ENSG00000083520	DIS3	0.310246	0.620985
ENSG00000083535	PIBF1	0.994905	0.272278
ENSG00000083544	TDRD3	0.726174	0.421392
ENSG00000083635	NUFIP1	0.841416	0.150429
ENSG00000083642	PDS5B	0.106032	0.925965
ENSG00000083720	OXCT1	-0.445564	0.466236
ENSG00000083750	RRAGB	-0.720316	0.222598
ENSG00000083799	CYLD	-0.0516759	0.949147
ENSG00000083812	ZNF324	0.866916	0.201728
ENSG00000083814	ZNF671	1.15705	0.407236
ENSG00000083817	ZNF416	0.449768	0.588485
ENSG00000083828	ZNF586	0.859632	0.602635
ENSG00000083838	ZNF446	-0.459038	0.668483
ENSG00000083844	ZNF264	1.63264	0.0594072
ENSG00000083845	RPS5	0.0396783	0.920581
ENSG00000083857	FAT1	-0.510582	0.623634
ENSG00000083896	YTHDC1	0.0821071	0.881538
ENSG00000083937	CHMP2B	-0.327438	0.723898
ENSG00000084070	SMAP2	-0.644774	0.430645
ENSG00000084072	PPIE	-0.176628	0.76628
ENSG00000084073	ZMPSTE24	0.421063	0.325486
ENSG00000084090	STARD7	0.867241	0.0342835
ENSG00000084092	NOA1	-0.562795	0.333522
ENSG00000084093	REST	-0.940531	0.64631
ENSG00000084112	SSH1	-1.8383	0.000228828
ENSG00000084207	GSTP1	-0.470697	0.423585
ENSG00000084234	APLP2	-0.926541	0.151153
ENSG00000084444	FAM234B	-0.339197	0.718366
ENSG00000084463	WBP11	0.619851	0.460727
ENSG00000084623	EIF3I	-2.37349	1.11448e-05
ENSG00000084636	COL16A1	-2.84561	3.67561e-11
ENSG00000084652	TXLNA	0.203518	0.704395
ENSG00000084676	NCOA1	0.955355	0.079555
ENSG00000084693	AGBL5	-0.283328	0.729943
ENSG00000084731	KIF3C	-2.27336	1.07868e-06
ENSG00000084733	RAB10	-0.679927	0.232185
ENSG00000084754	HADHA	-0.357332	0.642524
ENSG00000084764	MAPRE3	1.30616	0.0931704
ENSG00000084774	CAD	-0.129902	0.916359
ENSG00000085063	CD59	-0.679969	0.542096
ENSG00000085117	CD82	3.97845	4.50854e-07
ENSG00000085185	BCORL1	-0.4367	0.776265
ENSG00000085224	ATRX	0.607463	0.352408
ENSG00000085231	AK6	0.0389914	0.964133
ENSG00000085274	MYNN	0.0681391	0.93289
ENSG00000085276	MECOM	0.0730983	0.971379
ENSG00000085365	SCAMP1	0.532574	0.390512
ENSG00000085377	PREP	0.740208	0.0134983
ENSG00000085382	HACE1	-1.33553	0.0316343
ENSG00000085415	SEH1L	-1.3833	0.00846018
ENSG00000085433	WDR47	-0.589715	0.159179
ENSG00000085449	WDFY1	-0.0876216	0.908308
ENSG00000085491	SLC25A24	-0.127202	0.788754
ENSG00000085511	MAP3K4	-0.137932	0.879576
ENSG00000085644	ZNF213	-0.733187	0.285602
ENSG00000085662	AKR1B1	0.141275	0.901662
ENSG00000085719	CPNE3	-0.251702	0.663779
ENSG00000085721	RRN3	0.399844	0.4135
ENSG00000085733	CTTN	-0.644393	0.238875
ENSG00000085760	MTIF2	-0.114892	0.851932
ENSG00000085788	DDHD2	-1.7601	0.000167899
ENSG00000085832	EPS15	0.605022	0.680942
ENSG00000085840	ORC1	-2.46163	0.0744283
ENSG00000085871	MGST2	1.58816	0.135084
ENSG00000085872	CHERP	-0.443625	0.540199
ENSG00000085978	ATG16L1	0.629133	0.264294
ENSG00000085982	USP40	0.372272	0.688951
ENSG00000085998	POMGNT1	0.194853	0.823803
ENSG00000085999	RAD54L	-3.13136	0.0464015
ENSG00000086015	MAST2	-1.94151	0.0171523
ENSG00000086061	DNAJA1	0.635644	0.214627
ENSG00000086062	B4GALT1	-0.861777	0.0168862
ENSG00000086065	CHMP5	0.549691	0.280441
ENSG00000086102	NFX1	0.530726	0.301899
ENSG00000086189	DIMT1	-1.66061	0.559503
ENSG00000086200	IPO11	0.3653	0.566345
ENSG00000086232	EIF2AK1	-1.19667	0.0129366
ENSG00000086289	EPDR1	-2.07863	0.418773
ENSG00000086475	SEPHS1	-1.0462	0.00958153
ENSG00000086504	MRPL28	-0.0873179	0.895327
ENSG00000086544	ITPKC	0.903977	0.0448888
ENSG00000086589	RBM22	0.34188	0.513411
ENSG00000086598	TMED2	0.310013	0.39768
ENSG00000086619	ERO1B	2.33111	0.0203391
ENSG00000086666	ZFAND6	0.928726	0.0983791
ENSG00000086712	TXLNG	0.912936	0.029976
ENSG00000086758	HUWE1	0.257763	0.582115
ENSG00000086827	ZW10	-0.446188	0.449781
ENSG00000086848	ALG9	1.16454	0.0410623
ENSG00000086991	NOX4	1.45756	0.45879
ENSG00000087008	ACOX3	0.782916	0.211186
ENSG00000087053	MTMR2	-1.7179	0.00687099
ENSG00000087074	PPP1R15A	-2.18772	0.0012389
ENSG00000087077	TRIP6	-0.356534	0.424772
ENSG00000087086	FTL	-0.0877487	0.916359
ENSG00000087087	SRRT	0.407731	0.455981
ENSG00000087088	BAX	1.1789	0.000125633
ENSG00000087095	NLK	1.47859	0.0824552
ENSG00000087111	PIGS	-0.114452	0.9035
ENSG00000087116	ADAMTS2	-0.530858	0.509811
ENSG00000087152	ATXN7L3	-0.614572	0.210207
ENSG00000087157	PGS1	1.75438	3.6418e-06
ENSG00000087191	PSMC5	0.308681	0.472808
ENSG00000087206	UIMC1	-0.514822	0.371635
ENSG00000087245	MMP2	-0.37979	0.777402
ENSG00000087253	LPCAT2	-4.0593	2.95023e-05
ENSG00000087258	GNAO1	-2.10491	0.379363
ENSG00000087263	OGFOD1	0.228598	0.707803
ENSG00000087266	SH3BP2	0.210056	0.912859
ENSG00000087269	NOP14	-0.421653	0.542688
ENSG00000087274	ADD1	0.330552	0.380328
ENSG00000087299	L2HGDH	-0.574429	0.459118
ENSG00000087301	TXNDC16	0.990896	0.382119
ENSG00000087302	RTRAF	0.0695343	0.906944
ENSG00000087303	NID2	-0.294123	0.852913
ENSG00000087338	GMCL1	0.574426	0.379659
ENSG00000087365	SF3B2	0.523885	0.294456
ENSG00000087448	KLHL42	-0.188522	0.729908
ENSG00000087460	GNAS	0.352131	0.466371
ENSG00000087470	DNM1L	-0.617492	0.431126
ENSG00000087494	PTHLH	6.12755	4.49387e-20
ENSG00000087502	ERGIC2	-0.111151	0.838878
ENSG00000087586	AURKA	-2.29108	0.0203593
ENSG00000087842	PIR	1.19314	0.361468
ENSG00000087884	AAMDC	-1.17428	0.0830332
ENSG00000087903	RFX2	0.705774	0.261333
ENSG00000087995	METTL2A	0.177626	0.818681
ENSG00000088035	ALG6	-1.69973	0.412157
ENSG00000088038	CNOT3	0.962702	0.0676245
ENSG00000088179	PTPN4	1.38291	0.0159638
ENSG00000088205	DDX18	-0.302493	0.525935
ENSG00000088247	KHSRP	-0.866166	0.291516
ENSG00000088256	GNA11	-0.989512	0.0245087
ENSG00000088280	ASAP3	0.0347919	0.972179
ENSG00000088298	EDEM2	2.23252	3.23018e-07
ENSG00000088325	TPX2	-3.17288	6.80173e-06
ENSG00000088356	PDRG1	0.0136854	0.987277
ENSG00000088367	EPB41L1	-1.42681	0.140549
ENSG00000088387	DOCK9	-0.194264	0.889879
ENSG00000088448	ANKRD10	0.561483	0.579893
ENSG00000088451	TGDS	0.2764	0.782537
ENSG00000088543	C3orf18	0.853458	0.359004
ENSG00000088682	COQ9	0.215111	0.740452
ENSG00000088727	KIF9	0.396936	0.798917
ENSG00000088766	CRLS1	-0.0374707	0.959879
ENSG00000088808	PPP1R13B	1.88391	0.436195
ENSG00000088812	ATRN	-0.322337	0.545874
ENSG00000088826	SMOX	2.56006	1.65372e-08
ENSG00000088832	FKBP1A	0.908482	0.0560172
ENSG00000088833	NSFL1C	-0.354804	0.561344
ENSG00000088854	DNAAF9	0.157229	0.817666
ENSG00000088876	ZNF343	0.780379	0.207636
ENSG00000088888	MAVS	0.0174211	0.980328
ENSG00000088899	LZTS3	-0.09787	0.955934
ENSG00000088930	XRN2	-0.233615	0.728626
ENSG00000088970	KIZ	-0.442728	0.443785
ENSG00000088986	DYNLL1	0.283802	0.572235
ENSG00000089006	SNX5	0.103076	0.886758
ENSG00000089009	RPL6	-0.70541	0.0283142
ENSG00000089022	MAPKAPK5	0.331398	0.537231
ENSG00000089048	ESF1	0.806893	0.219081
ENSG00000089050	RBBP9	-0.212301	0.736242
ENSG00000089053	ANAPC5	-0.0331272	0.948828
ENSG00000089057	SLC23A2	-0.818699	0.119988
ENSG00000089060	SLC8B1	1.72215	0.228045
ENSG00000089063	TMEM230	-0.0138804	0.98239
ENSG00000089094	KDM2B	-0.909609	0.127178
ENSG00000089123	TASP1	1.0928	0.144874
ENSG00000089127	OAS1	0.245154	0.908486
ENSG00000089154	GCN1	0.37026	0.617334
ENSG00000089157	RPLP0	-0.74045	0.00297045
ENSG00000089159	PXN	-1.28173	0.0762619
ENSG00000089177	KIF16B	0.741545	0.312705
ENSG00000089195	TRMT6	0.765254	0.238247
ENSG00000089220	PEBP1	0.11003	0.810906
ENSG00000089234	BRAP	0.117872	0.851694
ENSG00000089248	ERP29	-0.519646	0.211783
ENSG00000089280	FUS	-0.323234	0.57673
ENSG00000089289	IGBP1	-0.0581028	0.922361
ENSG00000089327	FXYD5	-0.480379	0.685429
ENSG00000089335	ZNF302	1.07594	0.0896758
ENSG00000089351	GRAMD1A	0.314457	0.817435
ENSG00000089472	HEPH	0.58238
ENSG00000089486	CDIP1	0.740879	0.622439
ENSG00000089597	GANAB	0.0352	0.946375
ENSG00000089639	GMIP	0.680209	0.503045
ENSG00000089682	RBM41	-0.913697	0.426309
ENSG00000089685	BIRC5	-3.55797	0.0166085
ENSG00000089693	MLF2	0.361785	0.263086
ENSG00000089723	OTUB2	2.50188	0.00711719
ENSG00000089737	DDX24	1.43277	1.71959e-05
ENSG00000089775	ZBTB25	0.536176	0.486856
ENSG00000089818	NECAP1	-0.405324	0.853883
ENSG00000089876	DHX32	0.0343124	0.959879
ENSG00000089902	RCOR1	-0.54161	0.38174
ENSG00000089916	GPATCH2L	-0.428946	0.700827
ENSG00000090006	LTBP4	-0.904628	0.564244
ENSG00000090013	BLVRB	-0.449079	0.45111
ENSG00000090020	SLC9A1	1.51945	0.00234619
ENSG00000090054	SPTLC1	-0.625204	0.0654367
ENSG00000090060	PAPOLA	0.3126	0.42811
ENSG00000090061	CCNK	-0.500588	0.314843
ENSG00000090097	PCBP4	0.422475	0.603094
ENSG00000090238	YPEL3	-1.28037	0.18431
ENSG00000090263	MRPS33	0.711076	0.22538
ENSG00000090266	NDUFB2	0.104018	0.87044
ENSG00000090273	NUDC	-0.0857323	0.908486
ENSG00000090316	MAEA	0.119361	0.809682
ENSG00000090339	ICAM1	0.563393	0.754618
ENSG00000090372	STRN4	-0.554394	0.211512
ENSG00000090376	IRAK3	1.45719	0.343195
ENSG00000090432	MUL1	1.01473	0.000960826
ENSG00000090447	TFAP4	-0.156252	0.929852
ENSG00000090470	PDCD7	0.0144627	0.984375
ENSG00000090487	SPG21	-0.190816	0.839839
ENSG00000090520	DNAJB11	0.0997376	0.865627
ENSG00000090530	P3H2	1.19788	0.414317
ENSG00000090554	FLT3LG	-1.37133	0.129463
ENSG00000090565	RAB11FIP3	-1.86535	0.000394543
ENSG00000090581	GNPTG	0.225371	0.828133
ENSG00000090612	ZNF268	0.218647	0.81177
ENSG00000090615	GOLGA3	-1.21061	0.489291
ENSG00000090621	PABPC4	-0.517866	0.45232
ENSG00000090661	CERS4	3.29484	0.0974169
ENSG00000090674	MCOLN1	1.2229	0.168442
ENSG00000090686	USP48	-0.51547	0.145503
ENSG00000090776	EFNB1	2.45062	0.00025315
ENSG00000090857	PDPR	2.04702	0.000138479
ENSG00000090861	AARS1	-1.50085	0.00134451
ENSG00000090863	GLG1	0.137764	0.772718
ENSG00000090889	KIF4A	-3.39811	0.000774349
ENSG00000090905	TNRC6A	0.488521	0.493044
ENSG00000090924	PLEKHG2	-0.0292528	0.964133
ENSG00000090932	DLL3	6.95011	1.0111e-13
ENSG00000090971	NAT14	0.938274	0.099892
ENSG00000090975	PITPNM2	-2.55901	0.000360963
ENSG00000090989	EXOC1	-0.101645	0.892038
ENSG00000091009	RBM27	0.694962	0.0873269
ENSG00000091039	OSBPL8	-0.965332	0.118794
ENSG00000091073	DTX2	-0.168103	0.901445
ENSG00000091127	PUS7	-0.824985	0.226925
ENSG00000091128	LAMB4	5.05576	0.0208713
ENSG00000091129	NRCAM	3.82327	4.96696e-05
ENSG00000091136	LAMB1	0.479248	0.610302
ENSG00000091140	DLD	0.323012	0.571448
ENSG00000091157	WDR7	-0.0899962	0.913937
ENSG00000091164	TXNL1	0.00911493	0.986165
ENSG00000091317	CMTM6	0.184672	0.800733
ENSG00000091409	ITGA6	-1.01535	0.515861
ENSG00000091436	MAP3K20	0.0655586	0.931054
ENSG00000091483	FH	1.02128	0.036873
ENSG00000091490	SEL1L3	1.87952	0.17844
ENSG00000091527	CDV3	0.250368	0.637327
ENSG00000091542	ALKBH5	0.83937	0.0151833
ENSG00000091592	NLRP1	-3.92824	1.28137e-11
ENSG00000091640	SPAG7	-1.52169	0.0283489
ENSG00000091651	ORC6	-1.90615	0.0261288
ENSG00000091732	ZC3HC1	0.390252	0.57269
ENSG00000091844	RGS17	-1.05287	0.586066
ENSG00000091947	TMEM101	1.1799	0.0175006
ENSG00000091986	CCDC80	-0.702095	0.630942
ENSG00000092010	PSME1	-0.141961	0.858095
ENSG00000092020	PPP2R3C	0.267213	0.697311
ENSG00000092036	HAUS4	-1.76855	0.000511011
ENSG00000092068	SLC7A8	6.92626	7.44376e-08
ENSG00000092094	OSGEP	0.716674	0.141498
ENSG00000092096	SLC22A17	0.924965	0.615725
ENSG00000092098	RNF31	0.0610865	0.93358
ENSG00000092108	SCFD1	0.0888443	0.858736
ENSG00000092140	G2E3	-0.724785	0.28809
ENSG00000092148	HECTD1	-0.0112455	0.991544
ENSG00000092199	HNRNPC	0.64052	0.0429561
ENSG00000092201	SUPT16H	-0.45032	0.328227
ENSG00000092203	TOX4	0.531989	0.179494
ENSG00000092208	GEMIN2	-0.342459	0.7291
ENSG00000092295	TGM1	-0.528762	0.836371
ENSG00000092330	TINF2	0.745624	0.175915
ENSG00000092421	SEMA6A	2.38841	0.298191
ENSG00000092439	TRPM7	-0.301323	0.761385
ENSG00000092445	TYRO3	1.72473	0.00157403
ENSG00000092470	WDR76	-2.17936	0.0236995
ENSG00000092531	SNAP23	-0.212795	0.865747
ENSG00000092621	PHGDH	-3.72899	3.22134e-05
ENSG00000092820	EZR	0.207306	0.881538
ENSG00000092841	MYL6	0.0223263	0.979247
ENSG00000092847	AGO1	-0.329422	0.900762
ENSG00000092853	CLSPN	-1.47603	0.272923
ENSG00000092871	RFFL	0.423075	0.611346
ENSG00000092931	MFSD11	1.0023	0.0258503
ENSG00000092964	DPYSL2	-0.0686876	0.939689
ENSG00000092969	TGFB2	0.65567	0.803413
ENSG00000092978	GPATCH2	1.07266	0.0351505
ENSG00000093000	NUP50	-0.838278	0.391758
ENSG00000093009	CDC45	-2.85063	0.054931
ENSG00000093010	COMT	0.373951	0.596773
ENSG00000093100		0.526765	0.55124
ENSG00000093144	ECHDC1	-0.60039	0.225481
ENSG00000093167	LRRFIP2	0.161207	0.845923
ENSG00000093183	SEC22C	-0.29681	0.710952
ENSG00000094631	HDAC6	-0.385262	0.851098
ENSG00000094804	CDC6	-2.41547	0.0876264
ENSG00000094841	UPRT	-0.145257	0.880878
ENSG00000094880	CDC23	0.418262	0.433505
ENSG00000094914	AAAS	-0.406093	0.477995
ENSG00000094916	CBX5	-0.313331	0.746193
ENSG00000094975	SUCO	1.24236	0.00143763
ENSG00000095002	MSH2	-1.66575	0.0134403
ENSG00000095015	MAP3K1	-0.28483	0.852913
ENSG00000095059	DHPS	-0.342741	0.569831
ENSG00000095066	HOOK2	-0.343092	0.720541
ENSG00000095139	ARCN1	-0.0694971	0.894326
ENSG00000095209	TMEM38B	0.621829	0.621429
ENSG00000095261	PSMD5	0.0434411	0.949041
ENSG00000095303	PTGS1	-3.50115	5.6453e-07
ENSG00000095319	NUP188	-0.653733	0.446187
ENSG00000095321	CRAT	-1.07236	0.088171
ENSG00000095380	NANS	0.110312	0.878291
ENSG00000095383	TBC1D2	-2.20016	8.81187e-05
ENSG00000095485	CWF19L1	0.662302	0.385214
ENSG00000095564	BTAF1	-0.542649	0.395961
ENSG00000095574	IKZF5	0.11935	0.886165
ENSG00000095637	SORBS1	-1.39582	0.588127
ENSG00000095739	BAMBI	-0.976002	0.592551
ENSG00000095752	IL11	-0.423718	0.918297
ENSG00000095787	WAC	0.272274	0.601674
ENSG00000095794	CREM	0.185012	0.823185
ENSG00000095906	NUBP2	-0.812008	0.0871761
ENSG00000095951	HIVEP1	-0.270108	0.594053
ENSG00000096060	FKBP5	-0.0849141	0.965521
ENSG00000096063	SRPK1	0.591991	0.293911
ENSG00000096070	BRPF3	-0.155228	0.82868
ENSG00000096080	MRPS18A	0.592905	0.222847
ENSG00000096092	TMEM14A	-0.192399	0.84989
ENSG00000096093	EFHC1	-0.174208	0.900762
ENSG00000096384	HSP90AB1	0.369497	0.505088
ENSG00000096401	CDC5L	0.0367242	0.952491
ENSG00000096433	ITPR3	-1.16451	0.346787
ENSG00000096654	ZNF184	1.26281	0.686176
ENSG00000096696	DSP	-1.52706	0.55119
ENSG00000096717	SIRT1	-0.727698	0.210199
ENSG00000096746	HNRNPH3	-1.00833	0.00279789
ENSG00000096872	IFT74	-0.348277	0.717512
ENSG00000096968	JAK2	-0.600128	0.384826
ENSG00000097007	ABL1	-1.57552	0.00316487
ENSG00000097021	ACOT7	-0.889428	0.276127
ENSG00000097033	SH3GLB1	-0.0176523	0.97586
ENSG00000097046	CDC7	-1.50915	0.1298
ENSG00000097096	SYDE2	-0.835891	0.496649
ENSG00000099194	SCD	-1.51729	0.140989
ENSG00000099203	TMED1	-0.519776	0.394627
ENSG00000099204	ABLIM1	0.758117	0.803444
ENSG00000099219	ERMP1	0.120512	0.963067
ENSG00000099246	RAB18	-0.580767	0.70821
ENSG00000099250	NRP1	-0.717478	0.363371
ENSG00000099256	PRTFDC1	0.0291562	0.971751
ENSG00000099260	PALMD	0.480298	0.839839
ENSG00000099290	WASHC2A	-0.761053	0.253879
ENSG00000099308	MAST3	0.387795	0.892181
ENSG00000099326	MZF1	0.453246	0.71969
ENSG00000099330	OCEL1	-1.05635	0.311436
ENSG00000099331	MYO9B	0.16958	0.813553
ENSG00000099337	KCNK6	-0.856852	0.543204
ENSG00000099341	PSMD8	0.401927	0.276591
ENSG00000099364	FBXL19	0.147558	0.887944
ENSG00000099377	HSD3B7	-0.71848	0.700827
ENSG00000099385	BCL7C	-0.771641	0.119988
ENSG00000099622	CIRBP	-1.1972	0.00619649
ENSG00000099624	ATP5F1D	0.0608763	0.940928
ENSG00000099783	HNRNPM	-0.728828	0.220354
ENSG00000099785	MARCHF2	-1.65617	0.00282047
ENSG00000099795	NDUFB7	-0.269419	0.587127
ENSG00000099797	TECR	-1.41736	0.00109176
ENSG00000099800	TIMM13	0.365695	0.513311
ENSG00000099804	CDC34	0.0978516	0.88982
ENSG00000099810	MTAP	-0.0977907	0.93194
ENSG00000099814	CEP170B	-1.51098	0.00427516
ENSG00000099817	POLR2E	-1.14582	0.00081782
ENSG00000099821	POLRMT	0.97865	0.0813648
ENSG00000099822	HCN2	-2.70393	0.0507264
ENSG00000099849	RASSF7	-2.27373	0.0589924
ENSG00000099860	GADD45B	-3.05691	8.21755e-11
ENSG00000099875	MKNK2	-1.81114	0.0013383
ENSG00000099889	ARVCF	1.70097	0.1213
ENSG00000099899	TRMT2A	0.623952	0.276857
ENSG00000099901	RANBP1	-0.382133	0.614695
ENSG00000099904	ZDHHC8	-1.38044	0.00958153
ENSG00000099910	KLHL22	-1.50209	0.00525004
ENSG00000099917	MED15	-0.573393	0.16998
ENSG00000099940	SNAP29	-0.115192	0.901499
ENSG00000099942	CRKL	0.158104	0.793766
ENSG00000099949	LZTR1	-0.66146	0.653966
ENSG00000099953	MMP11	4.38121	1.65523e-05
ENSG00000099956	SMARCB1	0.325467	0.484761
ENSG00000099968	BCL2L13	-0.778887	0.0875007
ENSG00000099977	DDT	-1.06371	0.00997341
ENSG00000099991	CABIN1	0.160897	0.835339
ENSG00000099992	TBC1D10A	0.29736	0.648374
ENSG00000099994	SUSD2	1.32949	0.67253
ENSG00000099995	SF3A1	-0.412728	0.619399
ENSG00000099998	GGT5	-0.824208	0.653296
ENSG00000099999	RNF215	0.795865	0.140382
ENSG00000100003	SEC14L2	0.915655	0.489339
ENSG00000100014	SPECC1L	-1.40005	0.000267041
ENSG00000100023	PPIL2	-0.1379	0.901499
ENSG00000100028	SNRPD3	0.44946	0.235758
ENSG00000100029	PES1	-0.382446	0.46768
ENSG00000100030	MAPK1	-0.371157	0.601762
ENSG00000100034	PPM1F	-0.924601	0.133871
ENSG00000100036	SLC35E4	0.69248	0.583119
ENSG00000100038	TOP3B	-0.0888218	0.906944
ENSG00000100056	ESS2	-0.804416	0.154214
ENSG00000100058		0.923615	0.318954
ENSG00000100065	CARD10	-1.49957	0.535674
ENSG00000100075	SLC25A1	-0.453895	0.299759
ENSG00000100077	GRK3	1.33964	0.434609
ENSG00000100083	GGA1	-0.14707	0.829777
ENSG00000100084	HIRA	0.289456	0.57699
ENSG00000100092	SH3BP1	-6.40661	0.000148878
ENSG00000100097	LGALS1	-1.39366	0.000292294
ENSG00000100099	HPS4	-1.01697	0.0479313
ENSG00000100100	PIK3IP1	-2.49077	0.00787544
ENSG00000100104	SRRD	1.31017	0.00484427
ENSG00000100105	PATZ1	-0.4731	0.453818
ENSG00000100106	TRIOBP	-0.894473	0.0134696
ENSG00000100109	TFIP11	0.0661679	0.931054
ENSG00000100116	GCAT	0.221695	0.832468
ENSG00000100124	ANKRD54	0.129003	0.831679
ENSG00000100129	EIF3L	-0.057055	0.913614
ENSG00000100138	SNU13	-0.0424227	0.960482
ENSG00000100139	MICALL1	0.108158	0.885307
ENSG00000100142	POLR2F	-0.654581	0.195585
ENSG00000100147	CCDC134	2.05993	0.000477353
ENSG00000100150	DEPDC5	0.883083	0.734763
ENSG00000100151	PICK1	-0.0489102	0.971292
ENSG00000100154	TTC28	0.707091	0.513348
ENSG00000100162	CENPM	-3.16267	0.037819
ENSG00000100196	KDELR3	-0.0894664	0.87044
ENSG00000100201	DDX17	0.358254	0.477798
ENSG00000100207	TCF20	0.915266	0.11839
ENSG00000100209	HSCB	0.414019	0.567262
ENSG00000100211	CBY1	-0.145288	0.835253
ENSG00000100216	TOMM22	0.226279	0.670111
ENSG00000100219	XBP1	-0.147532	0.810416
ENSG00000100220	RTCB	0.253034	0.701411
ENSG00000100221	JOSD1	-0.888335	0.0123243
ENSG00000100225	FBXO7	-0.0600012	0.925589
ENSG00000100226	GTPBP1	-0.414144	0.664993
ENSG00000100227	POLDIP3	-0.452242	0.35919
ENSG00000100228	RAB36	-2.08063	0.0390708
ENSG00000100234	TIMP3	-1.58652	0.573831
ENSG00000100239	PPP6R2	-0.0240539	0.978691
ENSG00000100241	SBF1	-0.119617	0.935042
ENSG00000100242	SUN2	0.453966	0.617667
ENSG00000100243	CYB5R3	-1.75105	3.3459e-06
ENSG00000100246	DNAL4	0.219506	0.816189
ENSG00000100258	LMF2	0.00639827	0.993192
ENSG00000100263	RHBDD3	0.77693	0.247025
ENSG00000100266	PACSIN2	-1.09547	0.000440661
ENSG00000100271	TTLL1	-0.0605902	0.952108
ENSG00000100280	AP1B1	-0.0307708	0.965182
ENSG00000100281	HMGXB4	-0.971082	0.0928453
ENSG00000100284	TOM1	-0.0535348	0.934633
ENSG00000100288	CHKB	1.00097	0.195585
ENSG00000100292	HMOX1	0.479639	0.609634
ENSG00000100294	MCAT	-0.306846	0.712103
ENSG00000100296	THOC5	-0.722673	0.124476
ENSG00000100297	MCM5	-3.20085	0.000688665
ENSG00000100299	ARSA	-0.180355	0.804446
ENSG00000100300	TSPO	-0.499024	0.462025
ENSG00000100302	RASD2	4.97348	0.000221483
ENSG00000100304	TTLL12	-0.798432	0.35172
ENSG00000100307	CBX7	-0.170672	0.857528
ENSG00000100316	RPL3	-0.475945	0.359905
ENSG00000100319	ZMAT5	-0.0749064	0.931768
ENSG00000100320	RBFOX2	0.417873	0.38094
ENSG00000100321	SYNGR1	-2.92137	0.0416885
ENSG00000100324	TAB1	-1.2395	0.0174033
ENSG00000100325	ASCC2	0.03918	0.953994
ENSG00000100330	MTMR3	-0.699353	0.112579
ENSG00000100335	MIEF1	0.206318	0.725888
ENSG00000100342	APOL1	-1.27148	0.32151
ENSG00000100344	PNPLA3	0.613072	0.594588
ENSG00000100345	MYH9	-2.3136	1.18674e-09
ENSG00000100347	SAMM50	-0.339278	0.594588
ENSG00000100348	TXN2	-0.148249	0.814497
ENSG00000100350	FOXRED2	-0.655103	0.79432
ENSG00000100353	EIF3D	0.497343	0.156292
ENSG00000100354	TNRC6B	1.35182	0.00164211
ENSG00000100359	SGSM3	0.619909	0.407601
ENSG00000100360	IFT27	-0.402646	0.569707
ENSG00000100364	KIAA0930	-0.817629	0.27606
ENSG00000100372	SLC25A17	-0.553113	0.41383
ENSG00000100376	FAM118A	0.379123	0.76002
ENSG00000100379	KCTD17	-0.877779	0.131701
ENSG00000100380	ST13	0.0211682	0.976501
ENSG00000100387	RBX1	0.381915	0.349612
ENSG00000100393	EP300	-1.80787	0.168396
ENSG00000100395	L3MBTL2	0.0400464	0.965467
ENSG00000100401	RANGAP1	-1.92455	0.00347971
ENSG00000100403	ZC3H7B	-1.83506	0.000194271
ENSG00000100410	PHF5A	-0.674469	0.144241
ENSG00000100412	ACO2	0.876182	0.0396136
ENSG00000100413	POLR3H	-0.816783	0.147601
ENSG00000100416	TRMU	-0.858735	0.147524
ENSG00000100417	PMM1	-0.731143	0.119956
ENSG00000100418	DESI1	0.791205	0.0307514
ENSG00000100422	CERK	-1.6924	0.001154
ENSG00000100425	BRD1	-0.366042	0.445199
ENSG00000100426	ZBED4	-0.97218	0.179261
ENSG00000100429	HDAC10	-0.349462	0.740023
ENSG00000100439	ABHD4	0.0761742	0.937725
ENSG00000100441	KHNYN	-1.43036	0.000393605
ENSG00000100442	FKBP3	-0.153569	0.768586
ENSG00000100445	SDR39U1	-0.2273	0.775782
ENSG00000100461	RBM23	-0.783059	0.101891
ENSG00000100462	PRMT5	0.716894	0.12353
ENSG00000100478	AP4S1	-0.175943	0.826196
ENSG00000100479	POLE2	-3.83691	0.0606896
ENSG00000100483	VCPKMT	0.701685	0.290864
ENSG00000100485	SOS2	-0.818934	0.0862949
ENSG00000100490	CDKL1	1.39104	0.00455303
ENSG00000100503	NIN	-1.35188	0.0023157
ENSG00000100504	PYGL	0.0616669	0.928906
ENSG00000100519	PSMC6	-0.295119	0.55351
ENSG00000100522	GNPNAT1	-0.197653	0.819964
ENSG00000100523	DDHD1	0.217727	0.802974
ENSG00000100526	CDKN3	-3.33852	0.0102731
ENSG00000100528	CNIH1	-0.0502024	0.940672
ENSG00000100532	CGRRF1	0.971263	0.180421
ENSG00000100554	ATP6V1D	0.355903	0.586066
ENSG00000100564	PIGH	0.505982	0.574077
ENSG00000100567	PSMA3	0.31176	0.530237
ENSG00000100568	VTI1B	-0.310477	0.42036
ENSG00000100575	TIMM9	0.869503	0.140744
ENSG00000100577	GSTZ1	0.34986	0.742163
ENSG00000100578	KIAA0586	-0.390337	0.720877
ENSG00000100580	TMED8	-0.326223	0.636661
ENSG00000100591	AHSA1	0.680059	0.20353
ENSG00000100592	DAAM1	0.801991	0.194449
ENSG00000100596	SPTLC2	0.999103	0.0114385
ENSG00000100599	RIN3	-0.0238763	0.982341
ENSG00000100600	LGMN	1.23038	0.0387898
ENSG00000100601	ALKBH1	0.952847	0.0827371
ENSG00000100603	SNW1	0.372785	0.462826
ENSG00000100605	ITPK1	-1.43578	0.0815288
ENSG00000100612	DHRS7	0.763452	0.0895313
ENSG00000100614	PPM1A	-0.196877	0.724372
ENSG00000100625	SIX4	0.902545	0.218971
ENSG00000100628	ASB2	2.69808	0.224042
ENSG00000100629	CEP128	-1.0727	0.432095
ENSG00000100632	ERH	-0.564388	0.424334
ENSG00000100644	HIF1A	-1.26865	0.0208844
ENSG00000100647	SUSD6	1.45224	0.0027091
ENSG00000100650	SRSF5	0.788577	0.0475626
ENSG00000100664	EIF5	0.320473	0.561582
ENSG00000100697	DICER1	-0.422924	0.502609
ENSG00000100711	ZFYVE21	-0.334398	0.588098
ENSG00000100714	MTHFD1	-0.638717	0.671604
ENSG00000100722	ZC3H14	-0.550856	0.421273
ENSG00000100726	TELO2	-0.903271	0.124848
ENSG00000100731	PCNX1	1.98112	4.76491e-05
ENSG00000100739	BDKRB1	-1.06445	0.573349
ENSG00000100744	GSKIP	0.671593	0.148133
ENSG00000100749	VRK1	-1.15394	0.529338
ENSG00000100764	PSMC1	-0.0130876	0.98107
ENSG00000100784	RPS6KA5	2.21675	0.219081
ENSG00000100796	PPP4R3A	1.15303	0.00299341
ENSG00000100802	C14orf93	-0.514302	0.63515
ENSG00000100804	PSMB5	0.714129	0.112895
ENSG00000100811	YY1	0.315733	0.454223
ENSG00000100813	ACIN1	-0.162655	0.775031
ENSG00000100814	CCNB1IP1	-0.762384	0.108898
ENSG00000100815	TRIP11	-0.196729	0.707307
ENSG00000100823	APEX1	0.4388	0.20955
ENSG00000100836	PABPN1	-0.202595	0.666356
ENSG00000100842	EFS	-0.783655	0.692612
ENSG00000100852	ARHGAP5	-0.215103	0.78086
ENSG00000100865	CINP	0.476584	0.305551
ENSG00000100867	DHRS2	6.88902	0.00687678
ENSG00000100883	SRP54	0.185965	0.750245
ENSG00000100888	CHD8	1.06391	0.0915754
ENSG00000100889	PCK2	-1.20836	0.0978373
ENSG00000100890	PRORP	0.69086	0.183538
ENSG00000100897	DCAF11	-0.264608	0.584524
ENSG00000100902	PSMA6	-0.557995	0.304803
ENSG00000100906	NFKBIA	0.745985	0.130684
ENSG00000100908	EMC9	-0.848824	0.193355
ENSG00000100911	PSME2	0.585783	0.474517
ENSG00000100916	BRMS1L	0.728094	0.116586
ENSG00000100918	REC8	-0.729569	0.652562
ENSG00000100926	TM9SF1	-0.329088	0.454078
ENSG00000100934	SEC23A	-0.665456	0.0603892
ENSG00000100938	GMPR2	0.00797482	0.99004
ENSG00000100941	PNN	0.250907	0.802182
ENSG00000100949	RABGGTA	0.355103	0.649019
ENSG00000100968	NFATC4	-0.258441	0.714837
ENSG00000100979	PLTP	1.28494	0.00942845
ENSG00000100982	PCIF1	-0.687434	0.271889
ENSG00000100991	TRPC4AP	-0.120559	0.811783
ENSG00000100994	PYGB	-0.712892	0.116085
ENSG00000100997	ABHD12	-0.196986	0.829085
ENSG00000101000	PROCR	2.59129	0.000367043
ENSG00000101003	GINS1	-2.73869	0.110665
ENSG00000101004	NINL	-0.879123	0.717599
ENSG00000101019	UQCC1	0.407546	0.341436
ENSG00000101040	ZMYND8	0.113306	0.878412
ENSG00000101052	IFT52	-0.195187	0.768502
ENSG00000101057	MYBL2	-1.90294	0.0314554
ENSG00000101079	NDRG3	0.569353	0.317453
ENSG00000101084	RAB5IF	1.41671	0.0301659
ENSG00000101104	PABPC1L	-0.23484	0.879576
ENSG00000101109	STK4	0.627093	0.21124
ENSG00000101126	ADNP	-0.338737	0.618613
ENSG00000101132	PFDN4	-0.588255	0.32704
ENSG00000101134	DOK5	1.17607	0.53392
ENSG00000101138	CSTF1	1.03009	0.0593242
ENSG00000101146	RAE1	0.172266	0.863005
ENSG00000101150	TPD52L2	-0.0863934	0.874953
ENSG00000101152	DNAJC5	-0.503598	0.402094
ENSG00000101158	NELFCD	-0.0622252	0.968224
ENSG00000101160	CTSZ	-1.8075	0.00320347
ENSG00000101161	PRPF6	-0.132662	0.851544
ENSG00000101166	PRELID3B	0.254199	0.588598
ENSG00000101181	MTG2	-0.626248	0.219764
ENSG00000101182	PSMA7	-0.140688	0.84215
ENSG00000101189	MRGBP	-0.389433	0.701545
ENSG00000101190	TCFL5	-0.553034	0.298419
ENSG00000101191	DIDO1	0.0870356	0.916442
ENSG00000101193	GID8	0.42369	0.292518
ENSG00000101194	SLC17A9	-1.49374	0.0140587
ENSG00000101199	ARFGAP1	0.0163069	0.979247
ENSG00000101216	GMEB2	0.0578302	0.944794
ENSG00000101220	ADISSP	0.140266	0.903871
ENSG00000101224	CDC25B	-2.25867	0.0184422
ENSG00000101236	RNF24	-0.864926	0.345262
ENSG00000101246	ARFRP1	-0.457817	0.550914
ENSG00000101247	NDUFAF5	-0.42229	0.645419
ENSG00000101255	TRIB3	-1.13426	0.195393
ENSG00000101265	RASSF2	-1.4504	0.471913
ENSG00000101266	CSNK2A1	0.423849	0.303408
ENSG00000101290	CDS2	0.937814	0.0160588
ENSG00000101294	HM13	0.662573	0.0244865
ENSG00000101298	SNPH	0.0445633	0.975298
ENSG00000101310	SEC23B	5.05793	1.25347e-06
ENSG00000101311	FERMT1	1.00254	0.513357
ENSG00000101333	PLCB4	3.05263	0.000172311
ENSG00000101335	MYL9	0.0145994	0.987386
ENSG00000101337	TM9SF4	0.946964	0.00375102
ENSG00000101343	CRNKL1	1.21339	0.00299897
ENSG00000101346	POFUT1	0.134331	0.883304
ENSG00000101347	SAMHD1	-0.830592	0.810549
ENSG00000101350	KIF3B	0.799631	0.0856516
ENSG00000101361	NOP56	0.589351	0.378691
ENSG00000101363	MANBAL	0.677747	0.110476
ENSG00000101365	IDH3B	0.514967	0.348098
ENSG00000101367	MAPRE1	0.151025	0.835698
ENSG00000101384	JAG1	0.223635	0.892038
ENSG00000101391	CDK5RAP1	0.131312	0.881328
ENSG00000101400	SNTA1	-1.2324	0.120093
ENSG00000101407	TTI1	-0.512508	0.430085
ENSG00000101412	E2F1	-4.05763	0.00197767
ENSG00000101413	RPRD1B	0.269771	0.580233
ENSG00000101417	PXMP4	-1.69308	0.104895
ENSG00000101421	CHMP4B	-0.514968	0.1503
ENSG00000101439	CST3	1.29614	0.00411449
ENSG00000101442	ACTR5	0.243555	0.780872
ENSG00000101444	AHCY	-0.304867	0.769673
ENSG00000101445	PPP1R16B	10.1865	2.40655e-10
ENSG00000101447	FAM83D	-2.19961	0.00546456
ENSG00000101452	DHX35	0.546298	0.603094
ENSG00000101457	DNTTIP1	0.384541	0.421088
ENSG00000101460	MAP1LC3A	-0.127407	0.900696
ENSG00000101464	PIGU	-0.294699	0.703717
ENSG00000101473	ACOT8	1.33877	0.00898786
ENSG00000101474	APMAP	0.177047	0.783881
ENSG00000101493	ZNF516	2.7009	0.00219798
ENSG00000101544	ADNP2	-0.273928	0.780853
ENSG00000101546	RBFA	-0.714201	0.204598
ENSG00000101557	USP14	0.0163155	0.980045
ENSG00000101558	VAPA	0.579024	0.19496
ENSG00000101574	METTL4	0.156639	0.88868
ENSG00000101596	SMCHD1	-1.60364	0.00902972
ENSG00000101608	MYL12A	0.28401	0.716431
ENSG00000101624	CEP76	0.731818	0.390404
ENSG00000101638	ST8SIA5	12.0415	2.15995e-13
ENSG00000101639	CEP192	-1.15673	0.0389124
ENSG00000101654	RNMT	0.315029	0.659667
ENSG00000101665	SMAD7	-1.10018	0.0137344
ENSG00000101670	LIPG	5.36278	6.30805e-05
ENSG00000101680	LAMA1	-1.36778	0.272087
ENSG00000101745	ANKRD12	1.21897	0.00224577
ENSG00000101751	POLI	-0.456364	0.481271
ENSG00000101752	MIB1	0.902444	0.00499547
ENSG00000101773	RBBP8	-0.700209	0.280426
ENSG00000101782	RIOK3	0.13679	0.849297
ENSG00000101811	CSTF2	0.0740357	0.939995
ENSG00000101825	MXRA5	6.31309	2.25813e-07
ENSG00000101843	PSMD10	-0.0119231	0.984615
ENSG00000101844	ATG4A	1.40833	0.00539682
ENSG00000101849	TBL1X	-0.751973	0.76205
ENSG00000101856	PGRMC1	1.05277	0.0256219
ENSG00000101868	POLA1	-2.09093	0.052527
ENSG00000101871	MID1	0.473861	0.624491
ENSG00000101882	NKAP	0.716776	0.354316
ENSG00000101888	NXT2	1.1333	0.146209
ENSG00000101901	ALG13	0.470394	0.470141
ENSG00000101911	PRPS2	-1.06399	0.332251
ENSG00000101928	MOSPD1	0.253556	0.738694
ENSG00000101935	AMMECR1	0.512332	0.28871
ENSG00000101940	WDR13	-0.258287	0.781332
ENSG00000101945	SUV39H1	-0.693679	0.586332
ENSG00000101955	SRPX	0.838902	0.575522
ENSG00000101966	XIAP	0.919391	0.0270723
ENSG00000101972	STAG2	-1.61926	0.0265888
ENSG00000101974	ATP11C	-0.0262556	0.98239
ENSG00000101986	ABCD1	-1.1186	0.164791
ENSG00000101997	CCDC22	-1.13386	0.112386
ENSG00000102007	PLP2	-1.96282	0.00010772
ENSG00000102024	PLS3	-1.40721	4.58737e-06
ENSG00000102030	NAA10	0.08921	0.876627
ENSG00000102032	RENBP	0.448087	0.816282
ENSG00000102034	ELF4	-0.723397	0.444561
ENSG00000102038	SMARCA1	0.0952135	0.905757
ENSG00000102054	RBBP7	-0.138764	0.746193
ENSG00000102057	KCND1	4.45206	0.0040927
ENSG00000102078	SLC25A14	-0.191298	0.835253
ENSG00000102081	FMR1	-1.50904	0.135238
ENSG00000102096	PIM2	0.0416949	0.976374
ENSG00000102098	SCML2	3.09081	0.00125565
ENSG00000102100	SLC35A2	-0.35111	0.42168
ENSG00000102103	PQBP1	-0.893097	0.14901
ENSG00000102119	EMD	-1.19239	0.0566134
ENSG00000102125	TAFAZZIN	-1.20654	0.111078
ENSG00000102144	PGK1	-0.793785	0.375694
ENSG00000102158	MAGT1	-0.92055	0.0962003
ENSG00000102172	SMS	-1.17815	0.0441859
ENSG00000102174	PHEX	2.26	0.204078
ENSG00000102178	UBL4A	-0.508176	0.427974
ENSG00000102181	CD99L2	-0.585886	0.113555
ENSG00000102189	EEA1	-0.640832	0.231564
ENSG00000102218	RP2	-0.329201	0.642524
ENSG00000102221	JADE3	-1.54599	0.331318
ENSG00000102225	CDK16	-0.0413816	0.949041
ENSG00000102226	USP11	0.366339	0.460981
ENSG00000102241	HTATSF1	0.0531377	0.944743
ENSG00000102265	TIMP1	0.196769	0.879485
ENSG00000102271	KLHL4	1.34532	0.691888
ENSG00000102287	GABRE	-0.855679	0.616068
ENSG00000102302	FGD1	-0.846059	0.423618
ENSG00000102309	PIN4	0.0491982	0.94638
ENSG00000102312	PORCN	-3.28119	3.14059e-05
ENSG00000102316	MAGED2	0.352949	0.576187
ENSG00000102317	RBM3	-1.28481	0.000917295
ENSG00000102349	KLF8	-0.442855	0.828757
ENSG00000102359	SRPX2	1.00376	0.401486
ENSG00000102362	SYTL4	1.14919	0.470442
ENSG00000102385	DRP2	-2.50665	0.119627
ENSG00000102390	PBDC1	-0.973231	0.0193072
ENSG00000102393	GLA	-0.146955	0.903871
ENSG00000102401	ARMCX3	0.364626	0.398139
ENSG00000102409	BEX4	0.941389	0.46768
ENSG00000102452	NALCN	-2.60023	0.167917
ENSG00000102468	HTR2A	5.60386	9.72297e-05
ENSG00000102471	NDFIP2	-0.0572259	0.949387
ENSG00000102524	TNFSF13B	3.90867	0.000872728
ENSG00000102531	FNDC3A	0.754355	0.134112
ENSG00000102543	CDADC1	0.259576	0.851047
ENSG00000102547	CAB39L	1.2365	0.0155423
ENSG00000102554	KLF5	-0.373329	0.619658
ENSG00000102572	STK24	0.0680617	0.93194
ENSG00000102580	DNAJC3	0.26766	0.653451
ENSG00000102595	UGGT2	-0.612643	0.378126
ENSG00000102606	ARHGEF7	-0.097923	0.929157
ENSG00000102699	PARP4	-0.558007	0.514409
ENSG00000102710	SUPT20H	-0.108425	0.860825
ENSG00000102738	MRPS31	-0.0885814	0.944072
ENSG00000102743	SLC25A15	2.82411	0.644678
ENSG00000102753	KPNA3	0.405334	0.372277
ENSG00000102763	VWA8	0.373063	0.707902
ENSG00000102780	DGKH	0.225622	0.867
ENSG00000102781	KATNAL1	-0.680383	0.19151
ENSG00000102786	INTS6	0.893289	0.163178
ENSG00000102802	MEDAG	-5.19733	9.38027e-05
ENSG00000102804	TSC22D1	1.44804	0.0102653
ENSG00000102805	CLN5	1.51859	0.0256459
ENSG00000102858	MGRN1	-0.835837	0.221181
ENSG00000102870	ZNF629	0.221088	0.690866
ENSG00000102871	TRADD	-0.235526	0.793766
ENSG00000102882	MAPK3	-0.264231	0.623953
ENSG00000102890	ELMO3	1.76383	0.182538
ENSG00000102893	PHKB	0.622376	0.350584
ENSG00000102897	LYRM1	1.0124	0.0189136
ENSG00000102898	NUTF2	-0.160257	0.82752
ENSG00000102900	NUP93	1.68321	0.00855154
ENSG00000102901	CENPT	-0.562989	0.38469
ENSG00000102908	NFAT5	0.152398	0.853761
ENSG00000102910	LONP2	0.295556	0.457821
ENSG00000102921	N4BP1	0.377804	0.610663
ENSG00000102931	ARL2BP	0.428574	0.385381
ENSG00000102935	ZNF423	-0.395786	0.844198
ENSG00000102967	DHODH	-2.38807	0.00370251
ENSG00000102974	CTCF	-1.69939	0.0390708
ENSG00000102977	ACD	-1.45388	0.20536
ENSG00000102978	POLR2C	0.164023	0.772219
ENSG00000102984	ZNF821	0.595794	0.498126
ENSG00000102996	MMP15	2.3491	0.0785358
ENSG00000103005	USB1	-1.56996	0.166703
ENSG00000103018	CYB5B	-1.62976	0.104
ENSG00000103024	NME3	0.740264	0.26153
ENSG00000103034	NDRG4	3.54463	0.00604358
ENSG00000103035	PSMD7	0.0143095	0.975391
ENSG00000103037	SETD6	-0.624125	0.785105
ENSG00000103042	SLC38A7	-0.794166	0.322409
ENSG00000103043	VAC14	0.264331	0.68844
ENSG00000103047	TANGO6	-1.50091	0.0149461
ENSG00000103051	COG4	-0.317754	0.629265
ENSG00000103061	SLC7A6OS	0.331123	0.637007
ENSG00000103064	SLC7A6	-0.560322	0.123044
ENSG00000103066	PLA2G15	-0.928407	0.0924564
ENSG00000103091	WDR59	0.638398	0.370719
ENSG00000103111	MON1B	-0.994403	0.0309105
ENSG00000103121	CMC2	0.157795	0.85581
ENSG00000103126	AXIN1	-1.48875	0.00218482
ENSG00000103145	HCFC1R1	-1.01444	0.133493
ENSG00000103148	NPRL3	-0.558458	0.343734
ENSG00000103150	MLYCD	-0.149621	0.931054
ENSG00000103152	MPG	-0.730845	0.33589
ENSG00000103160	HSDL1	0.168599	0.803024
ENSG00000103168	TAF1C	-0.662979	0.308636
ENSG00000103174	NAGPA	-0.204963	0.828757
ENSG00000103175	WFDC1	6.20701	4.10092e-09
ENSG00000103187	COTL1	-2.6789	2.15116e-09
ENSG00000103194	USP10	0.223095	0.715811
ENSG00000103196	CRISPLD2	0.349112	0.835133
ENSG00000103197	TSC2	0.264059	0.678756
ENSG00000103199	ZNF500	0.173795	0.851604
ENSG00000103202	NME4	-0.69562	0.093142
ENSG00000103222	ABCC1	-0.793336	0.178537
ENSG00000103226	NOMO3	1.51417	0.0980635
ENSG00000103227	LMF1	0.465525	0.615005
ENSG00000103241	FOXF1	-1.91518	0.149434
ENSG00000103245	CIAO3	-0.910059	0.106358
ENSG00000103248	MTHFSD	-0.317992	0.70135
ENSG00000103249	CLCN7	-0.010147	0.991544
ENSG00000103253	HAGHL	-0.616938	0.743698
[truncated: 10,515 more rows]

## Sheet: Table S3
Table S4. Gene ontology enrichment in DEGs in the ISP-PMN-PD-MSCs vs the original PD-MSCs comparison.
Term	Term ID	source	p_value	term_size	query_size	intersection_size	precision	recall
cell periphery	GO:0071944	GO:CC	9.44569e-07	2894	377	139	0.3687	0.0480304
synaptic membrane	GO:0097060	GO:CC	1.48826e-06	195	377	24	0.0636605	0.123077
structural constituent of chromatin	GO:0030527	GO:MF	4.29101e-06	30	377	10	0.0265252	0.333333
signaling receptor activator activity	GO:0030546	GO:MF	4.29101e-06	174	377	22	0.0583554	0.126437
receptor ligand activity	GO:0048018	GO:MF	4.29101e-06	167	377	22	0.0583554	0.131737
postsynaptic membrane	GO:0045211	GO:CC	8.18641e-06	126	377	18	0.0477454	0.142857
signaling receptor regulator activity	GO:0030545	GO:MF	1.32893e-05	188	377	22	0.0583554	0.117021
plasma membrane	GO:0005886	GO:CC	1.87668e-05	2689	377	125	0.331565	0.0464857
dendritic tree	GO:0097447	GO:CC	2.34191e-05	369	377	31	0.0822281	0.0840108
dendrite	GO:0030425	GO:CC	2.34191e-05	369	377	31	0.0822281	0.0840108
somatodendritic compartment	GO:0036477	GO:CC	2.34191e-05	483	377	37	0.0981432	0.0766046
CENP-A containing nucleosome	GO:0043505	GO:CC	2.89071e-05	7	377	5	0.0132626	0.714286
CENP-A containing chromatin	GO:0061638	GO:CC	2.89071e-05	7	377	5	0.0132626	0.714286
Amyloid fiber formation	REAC:R-HSA-977225	REAC	3.53573e-05	50	377	11	0.0291777	0.22
Activated PKN1 stimulates transcription of AR (androgen receptor) regulated genes KLK2 and KLK3	REAC:R-HSA-5625886	REAC	3.53573e-05	23	377	8	0.0212202	0.347826
DNA methylation	REAC:R-HSA-5334118	REAC	3.53573e-05	20	377	8	0.0212202	0.4
RNA Polymerase I Promoter Opening	REAC:R-HSA-73728	REAC	3.53573e-05	21	377	8	0.0212202	0.380952
Replacement of protamines by nucleosomes in the male pronucleus	REAC:R-HSA-9821993	REAC	3.53573e-05	16	377	7	0.0185676	0.4375
neuron projection	GO:0043005	GO:CC	4.08108e-05	750	377	48	0.127321	0.064
neuronal cell body	GO:0043025	GO:CC	5.57112e-05	258	377	24	0.0636605	0.0930233
chromosome, centromeric core domain	GO:0034506	GO:CC	5.6364e-05	8	377	5	0.0132626	0.625
Chromatin modifications during the maternal to zygotic transition (MZT)	REAC:R-HSA-9821002	REAC	5.95107e-05	25	377	8	0.0212202	0.32
cell body	GO:0044297	GO:CC	6.48977e-05	300	377	26	0.0689655	0.0866667
Neuronal System	REAC:R-HSA-112316	REAC	6.76831e-05	166	377	19	0.0503979	0.114458
SIRT1 negatively regulates rRNA expression	REAC:R-HSA-427359	REAC	6.76831e-05	26	377	8	0.0212202	0.307692
Assembly of the ORC complex at the origin of replication	REAC:R-HSA-68616	REAC	7.71846e-05	27	377	8	0.0212202	0.296296
Packaging Of Telomere Ends	REAC:R-HSA-171306	REAC	9.54807e-05	20	377	7	0.0185676	0.35
plasma membrane region	GO:0098590	GO:CC	0.000110061	648	377	42	0.111406	0.0648148
Regulation of endogenous retroelements by the Human Silencing Hub (HUSH) complex	REAC:R-HSA-9843970	REAC	0.000115722	29	377	8	0.0212202	0.275862
Condensation of Prophase Chromosomes	REAC:R-HSA-2299718	REAC	0.000120712	30	377	8	0.0212202	0.266667
PRC2 methylates histones and DNA	REAC:R-HSA-212300	REAC	0.000120712	30	377	8	0.0212202	0.266667
Defective pyroptosis	REAC:R-HSA-9710421	REAC	0.000120712	30	377	8	0.0212202	0.266667
cell-cell signaling	GO:0007267	GO:BP	0.000160731	614	377	45	0.119363	0.0732899
Recognition and association of DNA glycosylase with site containing an affected purine	REAC:R-HSA-110330	REAC	0.000164074	23	377	7	0.0185676	0.304348
Cleavage of the damaged purine	REAC:R-HSA-110331	REAC	0.000164074	23	377	7	0.0185676	0.304348
Depurination	REAC:R-HSA-73927	REAC	0.000164074	23	377	7	0.0185676	0.304348
Transmission across Chemical Synapses	REAC:R-HSA-112315	REAC	0.000183656	122	377	15	0.0397878	0.122951
Neurotransmitter receptors and postsynaptic signal transmission	REAC:R-HSA-112314	REAC	0.000230329	95	377	13	0.0344828	0.136842
ERCC6 (CSB) and EHMT2 (G9a) positively regulate rRNA expression	REAC:R-HSA-427389	REAC	0.000235514	34	377	8	0.0212202	0.235294
Systemic lupus erythematosus	KEGG:05322	KEGG	0.000252626	39	377	9	0.0238727	0.230769
Neuroactive ligand-receptor interaction	KEGG:04080	KEGG	0.000252626	61	377	11	0.0291777	0.180328
extracellular region	GO:0005576	GO:CC	0.000263667	2092	377	97	0.257294	0.0463671
nucleosome	GO:0000786	GO:CC	0.000277815	58	377	10	0.0265252	0.172414
Recognition and association of DNA glycosylase with site containing an affected pyrimidine	REAC:R-HSA-110328	REAC	0.000300604	26	377	7	0.0185676	0.269231
Depyrimidination	REAC:R-HSA-73928	REAC	0.000300604	26	377	7	0.0185676	0.269231
Cleavage of the damaged pyrimidine	REAC:R-HSA-110329	REAC	0.000300604	26	377	7	0.0185676	0.269231
HDACs deacetylate histones	REAC:R-HSA-3214815	REAC	0.000316133	47	377	9	0.0238727	0.191489
Pre-NOTCH Transcription and Translation	REAC:R-HSA-1912408	REAC	0.000330156	48	377	9	0.0238727	0.1875
Base-Excision Repair, AP Site Formation	REAC:R-HSA-73929	REAC	0.000330156	27	377	7	0.0185676	0.259259
Meiotic synapsis	REAC:R-HSA-1221632	REAC	0.000330156	37	377	8	0.0212202	0.216216
Transcriptional regulation of granulopoiesis	REAC:R-HSA-9616222	REAC	0.000330156	37	377	8	0.0212202	0.216216
Pre-NOTCH Expression and Processing	REAC:R-HSA-1912422	REAC	0.000359462	61	377	10	0.0265252	0.163934
chemical synaptic transmission	GO:0007268	GO:BP	0.000419617	373	377	31	0.0822281	0.0831099
protein localization to CENP-A containing chromatin	GO:0061644	GO:BP	0.000419617	7	377	5	0.0132626	0.714286
trans-synaptic signaling	GO:0099537	GO:BP	0.000419617	377	377	31	0.0822281	0.0822281
anterograde trans-synaptic signaling	GO:0098916	GO:BP	0.000419617	373	377	31	0.0822281	0.0831099
neurotransmitter receptor activity	GO:0030594	GO:MF	0.000507356	15	377	6	0.0159151	0.4
Presynaptic nicotinic acetylcholine receptors	REAC:R-HSA-622323	REAC	0.000582215	3	377	3	0.00795756	1
Signaling by Nuclear Receptors	REAC:R-HSA-9006931	REAC	0.000582215	192	377	18	0.0477454	0.09375
Highly calcium permeable nicotinic acetylcholine receptors	REAC:R-HSA-629597	REAC	0.000582215	3	377	3	0.00795756	1
Meiotic recombination	REAC:R-HSA-912446	REAC	0.000582215	41	377	8	0.0212202	0.195122
Postsynaptic nicotinic acetylcholine receptors	REAC:R-HSA-622327	REAC	0.000582215	3	377	3	0.00795756	1
Highly calcium permeable postsynaptic nicotinic acetylcholine receptors	REAC:R-HSA-629594	REAC	0.000582215	3	377	3	0.00795756	1
Acetylcholine binding and downstream events	REAC:R-HSA-181431	REAC	0.000582215	3	377	3	0.00795756	1
Hypothalamus; neuronal cells[≥Low]	HPA:0260131	HPA	0.0006145	4	377	4	0.0106101	1
hormone activity	GO:0005179	GO:MF	0.000708095	24	377	7	0.0185676	0.291667
Hypothalamus	HPA:0260000	HPA	0.000749555	5	377	4	0.0106101	0.8
Hypothalamus; neuronal projections[≥Medium]	HPA:0260142	HPA	0.000749555	5	377	4	0.0106101	0.8
Hypothalamus; neuronal projections[≥Low]	HPA:0260141	HPA	0.000749555	5	377	4	0.0106101	0.8
postsynaptic specialization membrane	GO:0099634	GO:CC	0.000838697	53	377	9	0.0238727	0.169811
excitatory synapse	GO:0060076	GO:CC	0.000914118	31	377	7	0.0185676	0.225806
signaling receptor activity	GO:0038023	GO:MF	0.000916015	371	377	28	0.0742706	0.0754717
ligand-gated monoatomic cation channel activity	GO:0099094	GO:MF	0.000916015	36	377	8	0.0212202	0.222222
molecular transducer activity	GO:0060089	GO:MF	0.000916015	371	377	28	0.0742706	0.0754717
Formation of the beta-catenin:TCF transactivating complex	REAC:R-HSA-201722	REAC	0.000951522	44	377	8	0.0212202	0.181818
Telomere end packaging and neurodevelopmental disorders	WP:WP5567	WP	0.00103376	22	377	7	0.0185676	0.318182
synaptic signaling	GO:0099536	GO:BP	0.00105927	397	377	31	0.0822281	0.0780856
RUNX1 regulates genes involved in megakaryocyte differentiation and platelet function	REAC:R-HSA-8936459	REAC	0.00109717	45	377	8	0.0212202	0.177778
Inhibition of DNA recombination at telomere	REAC:R-HSA-9670095	REAC	0.00142966	35	377	7	0.0185676	0.2
RHO GTPases activate PKNs	REAC:R-HSA-5625740	REAC	0.00164349	48	377	8	0.0212202	0.166667
B-WICH complex positively regulates rRNA expression	REAC:R-HSA-5250924	REAC	0.00164349	48	377	8	0.0212202	0.166667
synapse	GO:0045202	GO:CC	0.00167252	983	377	52	0.137931	0.0528993
Alcoholism	KEGG:05034	KEGG	0.00168632	91	377	12	0.0318302	0.131868
HCMV Early Events	REAC:R-HSA-9609690	REAC	0.00174932	76	377	10	0.0265252	0.131579
RNA Polymerase I Promoter Escape	REAC:R-HSA-73772	REAC	0.00182363	49	377	8	0.0212202	0.163265
regulation of secretion	GO:0051046	GO:BP	0.00182891	330	377	27	0.071618	0.0818182
Oxidative Stress Induced Senescence	REAC:R-HSA-2559580	REAC	0.00186237	77	377	10	0.0265252	0.12987
Meiosis	REAC:R-HSA-1500620	REAC	0.00186237	63	377	9	0.0238727	0.142857
HCMV Late Events	REAC:R-HSA-9610379	REAC	0.00186237	63	377	9	0.0238727	0.142857
Nucleosome assembly	REAC:R-HSA-774815	REAC	0.00282405	40	377	7	0.0185676	0.175
Deposition of new CENPA-containing nucleosomes at the centromere	REAC:R-HSA-606279	REAC	0.00282405	40	377	7	0.0185676	0.175
Regulation of endogenous retroelements by Piwi-interacting RNAs (piRNAs)	REAC:R-HSA-9845323	REAC	0.00323262	54	377	8	0.0212202	0.148148
presynapse	GO:0098793	GO:CC	0.00326196	363	377	25	0.066313	0.0688705
ligand-gated monoatomic ion channel activity	GO:0015276	GO:MF	0.0032773	43	377	8	0.0212202	0.186047
presynaptic membrane	GO:0042734	GO:CC	0.00330717	79	377	10	0.0265252	0.126582
Reproduction	REAC:R-HSA-1474165	REAC	0.0034926	69	377	9	0.0238727	0.130435
transmitter-gated monoatomic ion channel activity involved in regulation of postsynaptic membrane potential	GO:1904315	GO:MF	0.00384897	8	377	4	0.0106101	0.5
ligand-gated channel activity	GO:0022834	GO:MF	0.00384897	45	377	8	0.0212202	0.177778
GPCR ligand binding	REAC:R-HSA-500792	REAC	0.00399981	86	377	10	0.0265252	0.116279
Diseases of programmed cell death	REAC:R-HSA-9645723	REAC	0.00399981	56	377	8	0.0212202	0.142857
Hypothalamus; neuronal cells[≥Medium]	HPA:0260132	HPA	0.00405636	3	377	3	0.00795756	1
DNA Damage/Telomere Stress Induced Senescence	REAC:R-HSA-2559586	REAC	0.00408621	43	377	7	0.0185676	0.162791
Choroid plexus	HPA:0120000	HPA	0.00422687	14	377	5	0.0132626	0.357143
Choroid plexus; ependymal cells[≥Low]	HPA:0120231	HPA	0.00422687	14	377	5	0.0132626	0.357143
Activation of HOX genes during differentiation	REAC:R-HSA-5619507	REAC	0.00440018	72	377	9	0.0238727	0.125
Activation of anterior HOX genes in hindbrain development during early embryogenesis	REAC:R-HSA-5617472	REAC	0.00440018	72	377	9	0.0238727	0.125
system process	GO:0003008	GO:BP	0.00443219	914	377	52	0.137931	0.0568928
postsynaptic specialization	GO:0099572	GO:CC	0.00479208	227	377	18	0.0477454	0.0792952
Nonhomologous End-Joining (NHEJ)	REAC:R-HSA-5693571	REAC	0.00509718	45	377	7	0.0185676	0.155556
G alpha (s) signalling events	REAC:R-HSA-418555	REAC	0.00509718	59	377	8	0.0212202	0.135593
Maternal to zygotic transition (MZT)	REAC:R-HSA-9816359	REAC	0.00509718	59	377	8	0.0212202	0.135593
transmitter-gated channel activity	GO:0022835	GO:MF	0.00560369	9	377	4	0.0106101	0.444444
transmitter-gated monoatomic ion channel activity	GO:0022824	GO:MF	0.00560369	9	377	4	0.0106101	0.444444
Transcriptional regulation by small RNAs	REAC:R-HSA-5578749	REAC	0.00563043	60	377	8	0.0212202	0.133333
acetylcholine-gated channel complex	GO:0005892	GO:CC	0.005912	5	377	3	0.00795756	0.6
acetylcholine-gated monoatomic cation-selective channel activity	GO:0022848	GO:MF	0.00605117	4	377	3	0.00795756	0.75
protein tyrosine kinase activator activity	GO:0030296	GO:MF	0.00606621	17	377	5	0.0132626	0.294118
gated channel activity	GO:0022836	GO:MF	0.00665162	79	377	10	0.0265252	0.126582
G protein-coupled receptor activity	GO:0004930	GO:MF	0.00665162	95	377	11	0.0291777	0.115789
transmembrane receptor protein tyrosine kinase activator activity	GO:0030297	GO:MF	0.00671617	10	377	4	0.0106101	0.4
Cerebellum; processes in molecular layer[≥Medium]	HPA:0091032	HPA	0.00680517	104	377	12	0.0318302	0.115385
NoRC negatively regulates rRNA expression	REAC:R-HSA-427413	REAC	0.00682503	62	377	8	0.0212202	0.129032
Regulation of endogenous retroelements by KRAB-ZFP proteins	REAC:R-HSA-9843940	REAC	0.00682503	62	377	8	0.0212202	0.129032
Positive epigenetic regulation of rRNA expression	REAC:R-HSA-5250913	REAC	0.00749069	63	377	8	0.0212202	0.126984
growth factor activity	GO:0008083	GO:MF	0.00770007	67	377	9	0.0238727	0.134328
Trafficking of AMPA receptors	REAC:R-HSA-399719	REAC	0.00778479	14	377	4	0.0106101	0.285714
Glutamate binding, activation of AMPA receptors and synaptic plasticity	REAC:R-HSA-399721	REAC	0.00778479	14	377	4	0.0106101	0.285714
Neuroactive ligand signaling	KEGG:04082	KEGG	0.00784058	50	377	8	0.0212202	0.16
Negative epigenetic regulation of rRNA expression	REAC:R-HSA-5250941	REAC	0.00883173	65	377	8	0.0212202	0.123077
extracellular ligand-gated monoatomic ion channel activity	GO:0005230	GO:MF	0.00889574	11	377	4	0.0106101	0.363636
transmembrane signaling receptor activity	GO:0004888	GO:MF	0.00889574	249	377	19	0.0503979	0.0763052
HCMV Infection	REAC:R-HSA-9609646	REAC	0.00901983	98	377	10	0.0265252	0.102041
perikaryon	GO:0043204	GO:CC	0.00903509	75	377	9	0.0238727	0.12
postsynaptic density membrane	GO:0098839	GO:CC	0.00903509	46	377	7	0.0185676	0.152174
postsynaptic neurotransmitter receptor activity	GO:0098960	GO:MF	0.00924043	5	377	3	0.00795756	0.6
acetylcholine receptor activity	GO:0015464	GO:MF	0.00924043	5	377	3	0.00795756	0.6
Senescence-Associated Secretory Phenotype (SASP)	REAC:R-HSA-2559582	REAC	0.00935578	66	377	8	0.0212202	0.121212
Recruitment and ATM-mediated phosphorylation of repair and signaling proteins at DNA double strand breaks	REAC:R-HSA-5693565	REAC	0.00935578	51	377	7	0.0185676	0.137255
regulation of secretion by cell	GO:1903530	GO:BP	0.0096646	305	377	24	0.0636605	0.0786885
ERBB2 Activates PTK6 Signaling	REAC:R-HSA-8847993	REAC	0.00969984	7	377	3	0.00795756	0.428571
Highly sodium permeable postsynaptic acetylcholine nicotinic receptors	REAC:R-HSA-629587	REAC	0.00971823	2	377	2	0.00530504	1
Passive transport by Aquaporins	REAC:R-HSA-432047	REAC	0.00971823	2	377	2	0.00530504	1
DNA Double Strand Break Response	REAC:R-HSA-5693606	REAC	0.00986868	52	377	7	0.0185676	0.134615
HDMs demethylate histones	REAC:R-HSA-3214842	REAC	0.00990258	26	377	5	0.0132626	0.192308
Vasopressin regulates renal water homeostasis via Aquaporins	REAC:R-HSA-432040	REAC	0.00990258	26	377	5	0.0132626	0.192308
Aquaporin-mediated transport	REAC:R-HSA-445717	REAC	0.00990258	26	377	5	0.0132626	0.192308
nervous system process	GO:0050877	GO:BP	0.0100618	477	377	32	0.0848806	0.067086
RNA Polymerase I Promoter Clearance	REAC:R-HSA-73854	REAC	0.0102187	68	377	8	0.0212202	0.117647
neuron to neuron synapse	GO:0098984	GO:CC	0.0102361	245	377	18	0.0477454	0.0734694
regulation of multicellular organismal process	GO:0051239	GO:BP	0.0104609	1718	377	81	0.214854	0.0471478
behavior	GO:0007610	GO:BP	0.0104609	352	377	26	0.0689655	0.0738636
RNA Polymerase I Transcription	REAC:R-HSA-73864	REAC	0.0111114	69	377	8	0.0212202	0.115942
Potassium Channels	REAC:R-HSA-1296071	REAC	0.0113966	27	377	5	0.0132626	0.185185
lipoprotein particle	GO:1990777	GO:CC	0.0120864	14	377	4	0.0106101	0.285714
plasma lipoprotein particle	GO:0034358	GO:CC	0.0120864	14	377	4	0.0106101	0.285714
postsynapse	GO:0098794	GO:CC	0.012358	453	377	27	0.071618	0.0596026
Cerebellum; processes in molecular layer[≥Low]	HPA:0091031	HPA	0.0124186	112	377	12	0.0318302	0.107143
plasma membrane bounded cell projection	GO:0120025	GO:CC	0.0125646	1441	377	65	0.172414	0.0451076
Base Excision Repair	REAC:R-HSA-73884	REAC	0.0126159	55	377	7	0.0185676	0.127273
postsynaptic density	GO:0014069	GO:CC	0.014341	214	377	16	0.0424403	0.0747664
cytokine activity	GO:0005125	GO:MF	0.0147205	60	377	8	0.0212202	0.133333
cell projection	GO:0042995	GO:CC	0.0152588	1511	377	67	0.177719	0.0443415
channel activity	GO:0015267	GO:MF	0.0161941	165	377	14	0.0371353	0.0848485
passive transmembrane transporter activity	GO:0022803	GO:MF	0.0161941	165	377	14	0.0371353	0.0848485
monoatomic ion channel activity	GO:0005216	GO:MF	0.0162032	147	377	13	0.0344828	0.0884354
monoatomic cation channel activity	GO:0005261	GO:MF	0.0162032	111	377	11	0.0291777	0.0990991
HATs acetylate histones	REAC:R-HSA-3214847	REAC	0.0167719	91	377	9	0.0238727	0.0989011
negative regulation of megakaryocyte differentiation	GO:0045653	GO:BP	0.0168592	8	377	4	0.0106101	0.5
Neutrophil extracellular trap formation	KEGG:04613	KEGG	0.0173333	88	377	10	0.0265252	0.113636
Efferent ducts	HPA:0660000	HPA	0.017904	20	377	5	0.0132626	0.25
Efferent ducts; ciliated cells[≥Low]	HPA:0661581	HPA	0.017904	20	377	5	0.0132626	0.25
locomotory behavior	GO:0007626	GO:BP	0.0179843	118	377	13	0.0344828	0.110169
organic hydroxy compound transport	GO:0015850	GO:BP	0.0187298	136	377	14	0.0371353	0.102941
regulation of long-term synaptic potentiation	GO:1900271	GO:BP	0.0192503	25	377	6	0.0159151	0.24
regulation of system process	GO:0044057	GO:BP	0.0192503	271	377	21	0.0557029	0.0774908
regulation of transport	GO:0051049	GO:BP	0.0192503	948	377	50	0.132626	0.0527426
multicellular organismal process	GO:0032501	GO:BP	0.0192503	3945	377	155	0.411141	0.0392902
synaptic transmission, cholinergic	GO:0007271	GO:BP	0.0192503	9	377	4	0.0106101	0.444444
nucleosome assembly	GO:0006334	GO:BP	0.0195279	62	377	9	0.0238727	0.145161
asymmetric synapse	GO:0032279	GO:CC	0.0208072	223	377	16	0.0424403	0.0717489
high-density lipoprotein particle	GO:0034364	GO:CC	0.0209103	8	377	3	0.00795756	0.375
myosin head/neck binding	GO:0032028	GO:MF	0.021233	2	377	2	0.00530504	1
glycerol-3-phosphate dehydrogenase [NAD(P)+] activity	GO:0047952	GO:MF	0.021233	2	377	2	0.00530504	1
water channel activity	GO:0015250	GO:MF	0.021233	2	377	2	0.00530504	1
potassium channel activity	GO:0005267	GO:MF	0.021233	25	377	5	0.0132626	0.2
glycerol-3-phosphate dehydrogenase (NAD+) activity	GO:0141152	GO:MF	0.021233	2	377	2	0.00530504	1
glycerol transmembrane transporter activity	GO:0015168	GO:MF	0.021233	2	377	2	0.00530504	1
olfactory receptor activity	GO:0004984	GO:MF	0.021233	2	377	2	0.00530504	1
Somitogenesis in the context of spondylocostal dysostosis	WP:WP4785	WP	0.0212564	4	377	3	0.00795756	0.75
protein-lipid complex	GO:0032994	GO:CC	0.0213794	17	377	4	0.0106101	0.235294
RUNX1 regulates transcription of genes involved in differentiation of HSCs	REAC:R-HSA-8939236	REAC	0.0215261	77	377	8	0.0212202	0.103896
Gene Silencing by RNA	REAC:R-HSA-211000	REAC	0.0230782	78	377	8	0.0212202	0.102564
signal release	GO:0023061	GO:BP	0.0235122	258	377	20	0.0530504	0.0775194
HDL remodeling	REAC:R-HSA-8964058	REAC	0.0240778	3	377	2	0.00530504	0.666667
GRB2 events in ERBB2 signaling	REAC:R-HSA-1963640	REAC	0.0240778	10	377	3	0.00795756	0.3
ERBB2 Regulates Cell Motility	REAC:R-HSA-6785631	REAC	0.0240778	10	377	3	0.00795756	0.3
Serotonin receptors	REAC:R-HSA-390666	REAC	0.0240778	3	377	2	0.00530504	0.666667
Synthesis, secretion, and deacylation of Ghrelin	REAC:R-HSA-422085	REAC	0.0240778	10	377	3	0.00795756	0.3
TNFs bind their physiological receptors	REAC:R-HSA-5669034	REAC	0.0240778	10	377	3	0.00795756	0.3
PI3K events in ERBB2 signaling	REAC:R-HSA-1963642	REAC	0.0240778	10	377	3	0.00795756	0.3
structural molecule activity	GO:0005198	GO:MF	0.0248812	467	377	27	0.071618	0.0578158
dendrite membrane	GO:0032590	GO:CC	0.0253816	18	377	4	0.0106101	0.222222
presynaptic active zone	GO:0048786	GO:CC	0.0253816	43	377	6	0.0159151	0.139535
neuronal cell body membrane	GO:0032809	GO:CC	0.0274308	9	377	3	0.00795756	0.333333
extracellular space	GO:0005615	GO:CC	0.0277678	1758	377	74	0.196286	0.0420933
modulation of chemical synaptic transmission	GO:0050804	GO:BP	0.0291472	263	377	20	0.0530504	0.0760456
regulation of trans-synaptic signaling	GO:0099177	GO:BP	0.0293918	264	377	20	0.0530504	0.0757576
excitatory extracellular ligand-gated monoatomic ion channel activity	GO:0005231	GO:MF	0.0305138	8	377	3	0.00795756	0.375
SOX genes and their influence on neurogenesis and neurodevelopmental disorders	WP:WP5568	WP	0.0305543	11	377	4	0.0106101	0.363636
dendritic spine	GO:0043197	GO:CC	0.0329974	96	377	9	0.0238727	0.09375
Tessadori Bicknell van Haaften syndrome variants nucleosome assembly	WP:WP5573	WP	0.0335483	12	377	4	0.0106101	0.333333
neuron spine	GO:0044309	GO:CC	0.0370516	98	377	9	0.0238727	0.0918367
cell surface	GO:0009986	GO:CC	0.0372424	380	377	22	0.0583554	0.0578947
G2/M DNA damage checkpoint	REAC:R-HSA-69473	REAC	0.0377411	68	377	7	0.0185676	0.102941
G protein-coupled peptide receptor activity	GO:0008528	GO:MF	0.0392733	18	377	4	0.0106101	0.222222
Long-term potentiation	REAC:R-HSA-9620244	REAC	0.0412545	12	377	3	0.00795756	0.25
ESR-mediated signaling	REAC:R-HSA-8939211	REAC	0.0413155	146	377	11	0.0291777	0.0753425
Signaling by NOTCH	REAC:R-HSA-157118	REAC	0.0413155	167	377	12	0.0318302	0.0718563
Expression and translocation of olfactory receptors	REAC:R-HSA-9752946	REAC	0.0413978	4	377	2	0.00530504	0.5
Defective LFNG causes SCDO3	REAC:R-HSA-5083630	REAC	0.0413978	4	377	2	0.00530504	0.5
Neurofascin interactions	REAC:R-HSA-447043	REAC	0.0413978	4	377	2	0.00530504	0.5
secretion by cell	GO:0032940	GO:BP	0.0417259	471	377	29	0.0769231	0.0615711
muscle contraction	GO:0006936	GO:BP	0.0417259	173	377	15	0.0397878	0.0867052
Processing of DNA double-strand break ends	REAC:R-HSA-5693607	REAC	0.0439963	71	377	7	0.0185676	0.0985915
Mitotic Prophase	REAC:R-HSA-68875	REAC	0.0439963	89	377	8	0.0212202	0.0898876
cell body membrane	GO:0044298	GO:CC	0.0454979	11	377	3	0.00795756	0.272727
regulation of neurotransmitter transport	GO:0051588	GO:BP	0.046776	57	377	8	0.0212202	0.140351
Class A/1 (Rhodopsin-like receptors)	REAC:R-HSA-373076	REAC	0.0479128	55	377	6	0.0159151	0.109091
acetylcholine binding	GO:0042166	GO:MF	0.0488418	3	377	2	0.00530504	0.666667
neuropeptide activity	GO:0160041	GO:MF	0.0488418	3	377	2	0.00530504	0.666667
serotonin receptor activity	GO:0099589	GO:MF	0.0488418	3	377	2	0.00530504	0.666667
neuropeptide receptor activity	GO:0008188	GO:MF	0.0488418	3	377	2	0.00530504	0.666667
neuropeptide hormone activity	GO:0005184	GO:MF	0.0488418	3	377	2	0.00530504	0.666667
G protein-coupled serotonin receptor activity	GO:0004993	GO:MF	0.0488418	3	377	2	0.00530504	0.666667
water transmembrane transporter activity	GO:0005372	GO:MF	0.0488418	3	377	2	0.00530504	0.666667

## Sheet: Table S4
Table S5. Gene ontology depletion in DEGs in the ISP-PMN-PD-MSCs vs the original PD-MSCs comparison.
Term	Term ID	source	p_value	term_size	query_size	intersection_size	precision	recall
nuclear division	GO:0000280	GO:BP	4.98572e-13	331	158	29	0.183544	0.0876133
mitotic nuclear division	GO:0140014	GO:BP	8.94907e-13	243	158	25	0.158228	0.102881
regulation of nuclear division	GO:0051783	GO:BP	2.75484e-12	112	158	18	0.113924	0.160714
organelle fission	GO:0048285	GO:BP	2.75484e-12	369	158	29	0.183544	0.0785908
regulation of mitotic nuclear division	GO:0007088	GO:BP	4.25813e-12	99	158	17	0.107595	0.171717
mitotic cell cycle process	GO:1903047	GO:BP	4.3801e-12	651	158	37	0.234177	0.0568356
cell division	GO:0051301	GO:BP	1.0635e-11	530	158	33	0.208861	0.0622642
sister chromatid segregation	GO:0000819	GO:BP	1.20617e-11	213	158	22	0.139241	0.103286
nuclear chromosome segregation	GO:0098813	GO:BP	1.20617e-11	263	158	24	0.151899	0.0912548
mitotic cell cycle	GO:0000278	GO:BP	1.24878e-11	761	158	39	0.246835	0.0512484
mitotic sister chromatid segregation	GO:0000070	GO:BP	2.5447e-11	176	158	20	0.126582	0.113636
cell cycle process	GO:0022402	GO:BP	2.79908e-11	1036	158	45	0.28481	0.0434363
chromosome segregation	GO:0007059	GO:BP	3.29675e-11	366	158	27	0.170886	0.0737705
cell cycle	GO:0007049	GO:BP	2.90355e-10	1299	158	49	0.310127	0.0377213
regulation of mitotic sister chromatid segregation	GO:0033047	GO:BP	4.91708e-10	53	158	12	0.0759494	0.226415
regulation of chromosome segregation	GO:0051983	GO:BP	5.80664e-10	121	158	16	0.101266	0.132231
regulation of chromosome separation	GO:1905818	GO:BP	9.28197e-10	71	158	13	0.0822785	0.183099
mitotic spindle checkpoint signaling	GO:0071174	GO:BP	1.21128e-09	45	158	11	0.0696203	0.244444
regulation of mitotic sister chromatid separation	GO:0010965	GO:BP	1.21128e-09	58	158	12	0.0759494	0.206897
mitotic spindle assembly checkpoint signaling	GO:0007094	GO:BP	1.21128e-09	45	158	11	0.0696203	0.244444
spindle assembly checkpoint signaling	GO:0071173	GO:BP	1.21128e-09	45	158	11	0.0696203	0.244444
spindle checkpoint signaling	GO:0031577	GO:BP	1.50301e-09	46	158	11	0.0696203	0.23913
negative regulation of mitotic sister chromatid segregation	GO:0033048	GO:BP	1.63365e-09	47	158	11	0.0696203	0.234043
negative regulation of mitotic metaphase/anaphase transition	GO:0045841	GO:BP	1.63365e-09	47	158	11	0.0696203	0.234043
negative regulation of mitotic sister chromatid separation	GO:2000816	GO:BP	1.63365e-09	47	158	11	0.0696203	0.234043
negative regulation of sister chromatid segregation	GO:0033046	GO:BP	1.63365e-09	47	158	11	0.0696203	0.234043
mitotic sister chromatid separation	GO:0051306	GO:BP	1.63365e-09	61	158	12	0.0759494	0.196721
chromosome separation	GO:0051304	GO:BP	1.66843e-09	77	158	13	0.0822785	0.168831
negative regulation of metaphase/anaphase transition of cell cycle	GO:1902100	GO:BP	1.76734e-09	48	158	11	0.0696203	0.229167
negative regulation of chromosome segregation	GO:0051985	GO:BP	1.76734e-09	48	158	11	0.0696203	0.229167
negative regulation of chromosome separation	GO:1905819	GO:BP	1.76734e-09	48	158	11	0.0696203	0.229167
Amplification of signal from the kinetochores	REAC:R-HSA-141424	REAC	1.87082e-09	90	158	14	0.0886076	0.155556
Amplification of signal from unattached kinetochores via a MAD2 inhibitory signal	REAC:R-HSA-141444	REAC	1.87082e-09	90	158	14	0.0886076	0.155556
Resolution of Sister Chromatid Cohesion	REAC:R-HSA-2500257	REAC	2.01274e-09	112	158	15	0.0949367	0.133929
regulation of sister chromatid segregation	GO:0033045	GO:BP	2.82157e-09	99	158	14	0.0886076	0.141414
EML4 and NUDC in mitotic spindle formation	REAC:R-HSA-9648025	REAC	6.17411e-09	103	158	14	0.0886076	0.135922
negative regulation of mitotic nuclear division	GO:0045839	GO:BP	6.58496e-09	54	158	11	0.0696203	0.203704
chromosome localization	GO:0050000	GO:BP	7.78464e-09	107	158	14	0.0886076	0.130841
Mitotic Spindle Checkpoint	REAC:R-HSA-69618	REAC	8.355e-09	107	158	14	0.0886076	0.130841
negative regulation of nuclear division	GO:0051784	GO:BP	9.44815e-09	56	158	11	0.0696203	0.196429
regulation of cell cycle process	GO:0010564	GO:BP	9.54297e-09	600	158	30	0.189873	0.05
metaphase/anaphase transition of mitotic cell cycle	GO:0007091	GO:BP	1.12958e-08	91	158	13	0.0822785	0.142857
negative regulation of chromosome organization	GO:2001251	GO:BP	1.23436e-08	92	158	13	0.0822785	0.141304
metaphase/anaphase transition of cell cycle	GO:0044784	GO:BP	1.23436e-08	92	158	13	0.0822785	0.141304
Mitotic Prometaphase	REAC:R-HSA-68877	REAC	1.82118e-08	185	158	17	0.107595	0.0918919
mitotic cell cycle phase transition	GO:0044772	GO:BP	2.93485e-08	372	158	23	0.14557	0.061828
RHO GTPases Activate Formins	REAC:R-HSA-5663220	REAC	3.97185e-08	123	158	14	0.0886076	0.113821
regulation of mitotic cell cycle	GO:0007346	GO:BP	4.22368e-08	414	158	24	0.151899	0.057971
regulation of chromosome organization	GO:0033044	GO:BP	5.29591e-08	227	158	18	0.113924	0.0792952
positive regulation of cell cycle process	GO:0090068	GO:BP	5.6298e-08	201	158	17	0.107595	0.0845771
regulation of cell cycle	GO:0051726	GO:BP	5.6298e-08	866	158	35	0.221519	0.0404157
attachment of spindle microtubules to kinetochore	GO:0008608	GO:BP	5.6298e-08	51	158	10	0.0632911	0.196078
hsa-mir-215-5p	MIRNA:hsa-mir-215-5p	MIRNA	7.22051e-08	610	158	31	0.196203	0.0508197
regulation of mitotic metaphase/anaphase transition	GO:0030071	GO:BP	7.33631e-08	87	158	12	0.0759494	0.137931
regulation of metaphase/anaphase transition of cell cycle	GO:1902099	GO:BP	8.22307e-08	88	158	12	0.0759494	0.136364
chromosome organization	GO:0051276	GO:BP	1.03368e-07	473	158	25	0.158228	0.0528541
Cell Cycle, Mitotic	REAC:R-HSA-69278	REAC	1.26836e-07	479	158	25	0.158228	0.0521921
spindle	GO:0005819	GO:CC	1.51443e-07	372	158	23	0.14557	0.061828
metaphase chromosome alignment	GO:0051310	GO:BP	1.9055e-07	95	158	12	0.0759494	0.126316
positive regulation of chromosome separation	GO:1905820	GO:BP	1.9055e-07	30	158	8	0.0506329	0.266667
positive regulation of mitotic sister chromatid separation	GO:1901970	GO:BP	2.23245e-07	20	158	7	0.0443038	0.35
cell cycle phase transition	GO:0044770	GO:BP	2.39886e-07	457	158	24	0.151899	0.0525164
condensed chromosome	GO:0000793	GO:CC	3.08165e-07	238	158	18	0.113924	0.0756303
regulation of mitotic cell cycle phase transition	GO:1901990	GO:BP	3.55267e-07	291	158	19	0.120253	0.0652921
microtubule cytoskeleton organization involved in mitosis	GO:1902850	GO:BP	4.90629e-07	151	158	14	0.0886076	0.0927152
mitotic cell cycle checkpoint signaling	GO:0007093	GO:BP	5.58705e-07	128	158	13	0.0822785	0.101562
condensed chromosome, centromeric region	GO:0000779	GO:CC	6.13334e-07	173	158	15	0.0949367	0.0867052
outer kinetochore	GO:0000940	GO:CC	6.13334e-07	21	158	7	0.0443038	0.333333
meiotic cell cycle	GO:0051321	GO:BP	6.79543e-07	182	158	15	0.0949367	0.0824176
chromosome, centromeric region	GO:0000775	GO:CC	7.11824e-07	235	158	17	0.107595	0.0723404
cellular response to stimulus	GO:0051716	GO:BP	8.4168e-07	4335	158	90	0.56962	0.0207612
meiotic cell cycle process	GO:1903046	GO:BP	8.45707e-07	133	158	13	0.0822785	0.0977444
signaling	GO:0023052	GO:BP	9.78369e-07	3642	158	80	0.506329	0.021966
attachment of mitotic spindle microtubules to kinetochore	GO:0051315	GO:BP	1.11512e-06	25	158	7	0.0443038	0.28
kinetochore	GO:0000776	GO:CC	1.41088e-06	162	158	14	0.0886076	0.0864198
positive regulation of cell cycle	GO:0045787	GO:BP	1.44126e-06	254	158	17	0.107595	0.0669291
Cell Cycle Checkpoints	REAC:R-HSA-69620	REAC	1.7473e-06	258	158	17	0.107595	0.0658915
Cell Cycle	REAC:R-HSA-1640170	REAC	1.7473e-06	592	158	26	0.164557	0.0439189
chromosomal region	GO:0098687	GO:CC	1.9716e-06	359	158	20	0.126582	0.0557103
cell cycle checkpoint signaling	GO:0000075	GO:BP	2.27035e-06	172	158	14	0.0886076	0.0813953
Separation of Sister Chromatids	REAC:R-HSA-2467813	REAC	2.33787e-06	174	158	14	0.0886076	0.0804598
spindle assembly	GO:0051225	GO:BP	2.43253e-06	121	158	12	0.0759494	0.0991736
RHO GTPase Effectors	REAC:R-HSA-195258	REAC	2.54887e-06	236	158	16	0.101266	0.0677966
signal transduction	GO:0007165	GO:BP	2.84768e-06	3387	158	75	0.474684	0.0221435
Signal Transduction	REAC:R-HSA-162582	REAC	2.85689e-06	1667	158	47	0.297468	0.0281944
regulation of cell cycle phase transition	GO:1901987	GO:BP	3.17717e-06	374	158	20	0.126582	0.0534759
mitotic metaphase chromosome alignment	GO:0007080	GO:BP	3.17717e-06	60	158	9	0.056962	0.15
positive regulation of chromosome segregation	GO:0051984	GO:BP	3.17717e-06	29	158	7	0.0443038	0.241379
Mitotic Metaphase and Anaphase	REAC:R-HSA-2555396	REAC	3.29311e-06	213	158	15	0.0949367	0.0704225
Mitotic Anaphase	REAC:R-HSA-68882	REAC	3.29311e-06	212	158	15	0.0949367	0.0707547
midbody	GO:0030496	GO:CC	3.75487e-06	179	158	14	0.0886076	0.0782123
cytoskeleton organization	GO:0007010	GO:BP	4.05002e-06	1039	158	35	0.221519	0.0336862
spindle organization	GO:0007051	GO:BP	4.45232e-06	183	158	14	0.0886076	0.0765027
negative regulation of mitotic cell cycle phase transition	GO:1901991	GO:BP	5.11584e-06	157	158	13	0.0822785	0.0828025
polymeric cytoskeletal fiber	GO:0099513	GO:CC	5.27091e-06	464	158	22	0.139241	0.0474138
mitotic spindle assembly	GO:0090307	GO:BP	8.03451e-06	67	158	9	0.056962	0.134328
reproductive process	GO:0022414	GO:BP	1.13214e-05	793	158	29	0.183544	0.03657
regulation of mitotic cell cycle spindle assembly checkpoint	GO:0090266	GO:BP	1.16709e-05	22	158	6	0.0379747	0.272727
regulation of mitotic spindle checkpoint	GO:1903504	GO:BP	1.16709e-05	22	158	6	0.0379747	0.272727
cell communication	GO:0007154	GO:BP	1.17596e-05	3647	158	77	0.487342	0.0211132
meiotic nuclear division	GO:0140013	GO:BP	1.18884e-05	116	158	11	0.0696203	0.0948276
response to hypoxia	GO:0001666	GO:BP	1.19987e-05	200	158	14	0.0886076	0.07
M Phase	REAC:R-HSA-68886	REAC	1.31997e-05	343	158	18	0.113924	0.0524781
regulation of spindle checkpoint	GO:0090231	GO:BP	1.48225e-05	23	158	6	0.0379747	0.26087
cell population proliferation	GO:0008283	GO:BP	1.66348e-05	1212	158	37	0.234177	0.0305281
hsa-mir-192-5p	MIRNA:hsa-mir-192-5p	MIRNA	1.703e-05	785	158	31	0.196203	0.0394904
mitotic spindle organization	GO:0007052	GO:BP	1.88775e-05	122	158	11	0.0696203	0.0901639
supramolecular fiber	GO:0099512	GO:CC	2.14365e-05	595	158	24	0.151899	0.0403361
supramolecular polymer	GO:0099081	GO:CC	2.14365e-05	595	158	24	0.151899	0.0403361
response to decreased oxygen levels	GO:0036293	GO:BP	2.19235e-05	211	158	14	0.0886076	0.0663507
regulation of organelle organization	GO:0033043	GO:BP	2.72891e-05	930	158	31	0.196203	0.0333333
cell motility	GO:0048870	GO:BP	2.92342e-05	1034	158	33	0.208861	0.0319149
response to stimulus	GO:0050896	GO:BP	3.46044e-05	5063	158	95	0.601266	0.0187636
positive regulation of cell population proliferation	GO:0008284	GO:BP	3.69638e-05	526	158	22	0.139241	0.0418251
negative regulation of cell cycle process	GO:0010948	GO:BP	3.71199e-05	255	158	15	0.0949367	0.0588235
cell migration	GO:0016477	GO:BP	3.71199e-05	946	158	31	0.196203	0.0327696
negative regulation of cell cycle phase transition	GO:1901988	GO:BP	3.72426e-05	222	158	14	0.0886076	0.0630631
intracellular signal transduction	GO:0035556	GO:BP	4.3959e-05	2070	158	51	0.322785	0.0246377
cytoskeleton-dependent cytokinesis	GO:0061640	GO:BP	4.46309e-05	108	158	10	0.0632911	0.0925926
negative regulation of mitotic cell cycle	GO:0045930	GO:BP	4.53145e-05	194	158	13	0.0822785	0.0670103
chromosome	GO:0005694	GO:CC	5.05771e-05	1386	158	39	0.246835	0.0281385
microtubule organizing center	GO:0005815	GO:CC	5.6136e-05	774	158	27	0.170886	0.0348837
microtubule cytoskeleton organization	GO:0000226	GO:BP	5.79527e-05	500	158	21	0.132911	0.042
response to oxygen levels	GO:0070482	GO:BP	6.27023e-05	233	158	14	0.0886076	0.0600858
positive regulation of mitotic sister chromatid segregation	GO:0062033	GO:BP	6.27676e-05	8	158	4	0.0253165	0.5
mitotic spindle midzone assembly	GO:0051256	GO:BP	6.27676e-05	8	158	4	0.0253165	0.5
mitotic cytokinesis	GO:0000281	GO:BP	6.31644e-05	88	158	9	0.056962	0.102273
cytoskeleton	GO:0005856	GO:CC	7.49573e-05	1702	158	44	0.278481	0.0258519
microtubule cytoskeleton	GO:0015630	GO:CC	8.07768e-05	1152	158	34	0.21519	0.0295139
negative regulation of cell cycle	GO:0045786	GO:BP	8.15172e-05	311	158	16	0.101266	0.0514469
response to abiotic stimulus	GO:0009628	GO:BP	8.15172e-05	740	158	26	0.164557	0.0351351
response to oxygen-containing compound	GO:1901700	GO:BP	9.09016e-05	993	158	31	0.196203	0.0312185
female meiotic nuclear division	GO:0007143	GO:BP	9.43621e-05	32	158	6	0.0379747	0.1875
female gamete generation	GO:0007292	GO:BP	0.000103168	94	158	9	0.056962	0.0957447
regulation of attachment of mitotic spindle microtubules to kinetochore	GO:1902423	GO:BP	0.000103168	9	158	4	0.0253165	0.444444
mitotic spindle elongation	GO:0000022	GO:BP	0.000103168	9	158	4	0.0253165	0.444444
multicellular organismal process	GO:0032501	GO:BP	0.000115707	3945	158	78	0.493671	0.0197719
intracellular membraneless organelle	GO:0043232	GO:CC	0.000124953	4190	158	81	0.512658	0.0193317
membraneless organelle	GO:0043228	GO:CC	0.000124953	4190	158	81	0.512658	0.0193317
cytokinesis	GO:0000910	GO:BP	0.000164175	156	158	11	0.0696203	0.0705128
spindle midzone assembly	GO:0051255	GO:BP	0.000165415	10	158	4	0.0253165	0.4
spindle localization	GO:0051653	GO:BP	0.00016878	54	158	7	0.0443038	0.12963
supramolecular complex	GO:0099080	GO:CC	0.000182763	1319	158	36	0.227848	0.0272934
mitotic spindle	GO:0072686	GO:CC	0.000182763	163	158	11	0.0696203	0.0674847
Hair follicle development cytodifferentiation stage 3 of 3	WP:WP2840	WP	0.000216135	40	158	7	0.0443038	0.175
regulation of attachment of spindle microtubules to kinetochore	GO:0051988	GO:BP	0.000226177	22	158	5	0.0316456	0.227273
Chromosomal passenger complex CPC (CDCA8, AURKB, BIRC5)	CORUM:2582	CORUM	0.000228258	3	158	3	0.0189873	1
meiotic chromosome segregation	GO:0045132	GO:BP	0.000239522	57	158	7	0.0443038	0.122807
positive regulation of mitotic cell cycle phase transition	GO:1901992	GO:BP	0.000247374	80	158	8	0.0506329	0.1
spindle elongation	GO:0051231	GO:BP	0.000247374	11	158	4	0.0253165	0.363636
Signaling by Rho GTPases	REAC:R-HSA-194315	REAC	0.000253417	555	158	21	0.132911	0.0378378
cellular response to oxygen-containing compound	GO:1901701	GO:BP	0.000255359	745	158	25	0.158228	0.033557
cellular response to chemical stimulus	GO:0070887	GO:BP	0.000263774	1325	158	36	0.227848	0.0271698
meiosis I cell cycle process	GO:0061982	GO:BP	0.000264388	81	158	8	0.0506329	0.0987654
positive regulation of nuclear division	GO:0051785	GO:BP	0.000274366	39	158	6	0.0379747	0.153846
membraneless organelle assembly	GO:0140694	GO:BP	0.000299493	349	158	16	0.101266	0.0458453
Chromosomal passenger complex CPC (INCENP, CDCA8, BIRC5, AURKB)	CORUM:1119	CORUM	0.000301477	4	158	3	0.0189873	0.75
Chromosomal passenger complex CPC (INCENP, CDCA8, BIRC5, AURKB)	CORUM:1118	CORUM	0.000301477	4	158	3	0.0189873	0.75
regulation of signaling	GO:0023051	GO:BP	0.00030392	2292	158	52	0.329114	0.0226876
Cyclin A/B1/B2 associated events during G2/M transition	REAC:R-HSA-69273	REAC	0.000338632	24	158	5	0.0316456	0.208333
Signaling by Rho GTPases, Miro GTPases and RHOBTB3	REAC:R-HSA-9716542	REAC	0.000340309	570	158	21	0.132911	0.0368421
organelle localization	GO:0051640	GO:BP	0.00034549	480	158	19	0.120253	0.0395833
microtubule associated complex	GO:0005875	GO:CC	0.000358859	115	158	9	0.056962	0.0782609
microtubule binding	GO:0008017	GO:MF	0.000374876	214	158	14	0.0886076	0.0654206
regulation of cellular component organization	GO:0051128	GO:BP	0.000386749	1758	158	43	0.272152	0.0244596
sexual reproduction	GO:0019953	GO:BP	0.000389535	575	158	21	0.132911	0.0365217
centrosome	GO:0005813	GO:CC	0.000406319	637	158	22	0.139241	0.0345369
chromosome passenger complex	GO:0032133	GO:CC	0.000406319	5	158	3	0.0189873	0.6
positive regulation of spindle checkpoint	GO:0090232	GO:BP	0.000478791	13	158	4	0.0253165	0.307692
regulation of cell population proliferation	GO:0042127	GO:BP	0.000545549	989	158	29	0.183544	0.0293225
intermediate filament	GO:0005882	GO:CC	0.000605342	48	158	6	0.0379747	0.125
regulation of metaphase plate congression	GO:0090235	GO:BP	0.000652847	14	158	4	0.0253165	0.285714
regulation of cell cycle checkpoint	GO:1901976	GO:BP	0.000678508	46	158	6	0.0379747	0.130435
negative regulation of ossification	GO:0030279	GO:BP	0.00068545	28	158	5	0.0316456	0.178571
positive regulation of biological process	GO:0048518	GO:BP	0.000723714	4001	158	76	0.481013	0.0189953
microtubule	GO:0005874	GO:CC	0.000733109	348	158	15	0.0949367	0.0431034
negative regulation of biological process	GO:0048519	GO:BP	0.000740057	3509	158	69	0.436709	0.0196637
regulation of animal organ morphogenesis	GO:2000027	GO:BP	0.000745593	47	158	6	0.0379747	0.12766
positive regulation of cell cycle phase transition	GO:1901989	GO:BP	0.000759069	95	158	8	0.0506329	0.0842105
protein localization to chromosome, centromeric region	GO:0071459	GO:BP	0.000788214	29	158	5	0.0316456	0.172414
positive regulation of chromosome organization	GO:2001252	GO:BP	0.000936902	98	158	8	0.0506329	0.0816327
establishment of spindle localization	GO:0051293	GO:BP	0.00103667	50	158	6	0.0379747	0.12
positive regulation of metaphase/anaphase transition of cell cycle	GO:1902101	GO:BP	0.00106799	16	158	4	0.0253165	0.25
positive regulation of mitotic metaphase/anaphase transition	GO:0045842	GO:BP	0.00106799	16	158	4	0.0253165	0.25
Phosphorylation of Emi1	REAC:R-HSA-176417	REAC	0.00108338	6	158	3	0.0189873	0.5
positive regulation of cellular component organization	GO:0051130	GO:BP	0.00111637	771	158	24	0.151899	0.0311284
regulation of cell communication	GO:0010646	GO:BP	0.00116274	2287	158	50	0.316456	0.0218627
regulation of biological process	GO:0050789	GO:BP	0.00116274	7104	158	115	0.727848	0.0161881
spindle midzone	GO:0051233	GO:CC	0.00117662	34	158	5	0.0316456	0.147059
positive regulation of mitotic nuclear division	GO:0045840	GO:BP	0.00121194	32	158	5	0.0316456	0.15625
positive regulation of organelle organization	GO:0010638	GO:BP	0.00121194	397	158	16	0.101266	0.0403023
regulation of intracellular signal transduction	GO:1902531	GO:BP	0.00126414	1380	158	35	0.221519	0.0253623
prostaglandin biosynthetic process	GO:0001516	GO:BP	0.00130483	17	158	4	0.0253165	0.235294
trabecula formation	GO:0060343	GO:BP	0.00130483	17	158	4	0.0253165	0.235294
cellular response to hypoxia	GO:0071456	GO:BP	0.00131679	104	158	8	0.0506329	0.0769231
animal organ development	GO:0048513	GO:BP	0.00132806	1741	158	41	0.259494	0.0235497
positive regulation of cellular process	GO:0048522	GO:BP	0.00133258	3794	158	72	0.455696	0.0189773
negative regulation of intracellular signal transduction	GO:1902532	GO:BP	0.00134153	538	158	19	0.120253	0.035316
negative regulation of cellular process	GO:0048523	GO:BP	0.00142551	3381	158	66	0.417722	0.0195209
microtubule-based process	GO:0007017	GO:BP	0.00150891	689	158	22	0.139241	0.0319303
ossification	GO:0001503	GO:BP	0.00154967	282	158	13	0.0822785	0.0460993
positive regulation of cell cycle checkpoint	GO:1901978	GO:BP	0.00157238	18	158	4	0.0253165	0.222222
establishment of meiotic spindle localization	GO:0051295	GO:BP	0.00157605	7	158	3	0.0189873	0.428571
regulation of cell motility	GO:2000145	GO:BP	0.0017114	647	158	21	0.132911	0.0324575
locomotion	GO:0040011	GO:BP	0.0017114	747	158	23	0.14557	0.0307898
positive regulation of mitotic cell cycle	GO:0045931	GO:BP	0.0017114	109	158	8	0.0506329	0.0733945
Keratinization	REAC:R-HSA-6805567	REAC	0.00177267	18	158	4	0.0253165	0.222222
cell periphery	GO:0071944	GO:CC	0.00189423	2894	158	58	0.367089	0.0200415
prostanoid biosynthetic process	GO:0046457	GO:BP	0.00190829	19	158	4	0.0253165	0.210526
cellular response to decreased oxygen levels	GO:0036294	GO:BP	0.00204415	112	158	8	0.0506329	0.0714286
negative regulation of organelle organization	GO:0010639	GO:BP	0.002093	292	158	13	0.0822785	0.0445205
kinesin complex	GO:0005871	GO:CC	0.00214104	39	158	5	0.0316456	0.128205
type B pancreatic cell proliferation	GO:0044342	GO:BP	0.00231685	20	158	4	0.0253165	0.2
positive regulation of attachment of mitotic spindle microtubules to kinetochore	GO:1902425	GO:BP	0.0023723	8	158	3	0.0189873	0.375
negative regulation of osteoblast differentiation	GO:0045668	GO:BP	0.00246691	38	158	5	0.0316456	0.131579
Regulation of mitotic cell cycle	REAC:R-HSA-453276	REAC	0.00247972	85	158	7	0.0443038	0.0823529
APC/C-mediated degradation of cell cycle proteins	REAC:R-HSA-174143	REAC	0.00247972	85	158	7	0.0443038	0.0823529
regulation of locomotion	GO:0040012	GO:BP	0.00251552	667	158	21	0.132911	0.0314843
multicellular organismal reproductive process	GO:0048609	GO:BP	0.002526	474	158	17	0.107595	0.035865
cyclin A2-CDK1 complex	GO:0097122	GO:CC	0.00257463	2	158	2	0.0126582	1
regulation of cell migration	GO:0030334	GO:BP	0.00258293	619	158	20	0.126582	0.0323102
regulation of cellular process	GO:0050794	GO:BP	0.00268275	6894	158	111	0.702532	0.016101
biological regulation	GO:0065007	GO:BP	0.00268275	7314	158	116	0.734177	0.01586
establishment of spindle orientation	GO:0051294	GO:BP	0.00269946	39	158	5	0.0316456	0.128205
spindle pole	GO:0000922	GO:CC	0.00282075	157	158	9	0.056962	0.0573248
regulation of signal transduction	GO:0009966	GO:BP	0.0029476	2066	158	45	0.28481	0.0217812
RasGAP-AURKB-survivin complex	CORUM:6756	CORUM	0.00301051	2	158	2	0.0126582	1
CDC2-CCNA2-CDK2 complex	CORUM:5559	CORUM	0.00301051	2	158	2	0.0126582	1
CDC2-CCNA2 complex	CORUM:5557	CORUM	0.00301051	2	158	2	0.0126582	1
cellular component organization	GO:0016043	GO:BP	0.00301941	4632	158	82	0.518987	0.0177029
regulation of BMP signaling pathway	GO:0030510	GO:BP	0.00301941	63	158	6	0.0379747	0.0952381
cellular response to growth factor stimulus	GO:0071363	GO:BP	0.00309345	484	158	17	0.107595	0.035124
tissue development	GO:0009888	GO:BP	0.00312013	1167	158	30	0.189873	0.0257069
developmental process	GO:0032502	GO:BP	0.00312013	3834	158	71	0.449367	0.0185185
regulation of midbrain dopaminergic neuron differentiation	GO:1904956	GO:BP	0.00312726	2	158	2	0.0126582	1
cellular response to luteinizing hormone stimulus	GO:0071373	GO:BP	0.00312726	2	158	2	0.0126582	1
platelet-derived growth factor production	GO:0090360	GO:BP	0.00312726	2	158	2	0.0126582	1
regulation of platelet-derived growth factor production	GO:0090361	GO:BP	0.00312726	2	158	2	0.0126582	1
cell differentiation	GO:0030154	GO:BP	0.00312726	2531	158	52	0.329114	0.0205452
positive regulation of platelet-derived growth factor production	GO:0090362	GO:BP	0.00312726	2	158	2	0.0126582	1
Wnt signaling pathway involved in somitogenesis	GO:0090244	GO:BP	0.00312726	2	158	2	0.0126582	1
cellular developmental process	GO:0048869	GO:BP	0.00314231	2532	158	52	0.329114	0.0205371
epithelium development	GO:0060429	GO:BP	0.00317433	684	158	21	0.132911	0.0307018
negative regulation of response to stimulus	GO:0048585	GO:BP	0.00318021	1172	158	30	0.189873	0.0255973
G2/M transition of mitotic cell cycle	GO:0000086	GO:BP	0.00352618	124	158	8	0.0506329	0.0645161
response to mechanical stimulus	GO:0009612	GO:BP	0.00352618	124	158	8	0.0506329	0.0645161
programmed cell death	GO:0012501	GO:BP	0.00367615	1357	158	33	0.208861	0.0243183
Kinesins	REAC:R-HSA-983189	REAC	0.00375752	41	158	5	0.0316456	0.121951
anatomical structure development	GO:0048856	GO:BP	0.0038384	3512	158	66	0.417722	0.0187927
cell death	GO:0008219	GO:BP	0.00384263	1361	158	33	0.208861	0.0242469
cellular response to oxygen levels	GO:0071453	GO:BP	0.00385328	126	158	8	0.0506329	0.0634921
Cell cycle	KEGG:04110	KEGG	0.00397348	148	158	10	0.0632911	0.0675676
negative regulation of osteoblast proliferation	GO:0033689	GO:BP	0.00413111	10	158	3	0.0189873	0.3
regulation of renal system process	GO:0098801	GO:BP	0.00413111	10	158	3	0.0189873	0.3
response to growth factor	GO:0070848	GO:BP	0.00413111	501	158	17	0.107595	0.0339321
regulation of type B pancreatic cell proliferation	GO:0061469	GO:BP	0.00413111	10	158	3	0.0189873	0.3
regulation of osteoblast differentiation	GO:0045667	GO:BP	0.00428782	97	158	7	0.0443038	0.0721649
apoptotic process	GO:0006915	GO:BP	0.0045413	1317	158	32	0.202532	0.0242976
regulation of cytokinesis	GO:0032465	GO:BP	0.00469169	70	158	6	0.0379747	0.0857143
endothelial cell migration	GO:0043542	GO:BP	0.00469374	165	158	9	0.056962	0.0545455
E2F1-p107-cyclinA complex	CORUM:5144	CORUM	0.0048848	3	158	2	0.0126582	0.666667
Chromosomal passenger complex CPC (INCENP, CDCA8, BIRC5)	CORUM:1120	CORUM	0.0048848	3	158	2	0.0126582	0.666667
BIRC5-AURKB-INCENP-EVI5 complex	CORUM:1087	CORUM	0.0048848	3	158	2	0.0126582	0.666667
CRM1-Survivin-AuroraB mitotic complex	CORUM:1116	CORUM	0.0048848	3	158	2	0.0126582	0.666667
Chromosomal passenger complex CPC (INCENP, BIRC5, AURKB)	CORUM:2579	CORUM	0.0048848	3	158	2	0.0126582	0.666667
intermediate filament cytoskeleton	GO:0045111	GO:CC	0.0049494	73	158	6	0.0379747	0.0821918
Synthesis of Prostaglandins (PG) and Thromboxanes (TX)	REAC:R-HSA-2162123	REAC	0.00500757	10	158	3	0.0189873	0.3
epithelial cell differentiation	GO:0030855	GO:BP	0.00502235	371	158	14	0.0886076	0.0377358
regulation of meiotic cell cycle	GO:0051445	GO:BP	0.00502235	46	158	5	0.0316456	0.108696
response to toxic substance	GO:0009636	GO:BP	0.00502235	132	158	8	0.0506329	0.0606061
microtubule motor activity	GO:0003777	GO:MF	0.00502824	43	158	6	0.0379747	0.139535
establishment or maintenance of cell polarity	GO:0007163	GO:BP	0.00503043	167	158	9	0.056962	0.0538922
response to chemical	GO:0042221	GO:BP	0.00510795	2068	158	44	0.278481	0.0212766
tubulin binding	GO:0015631	GO:MF	0.00517707	295	158	14	0.0886076	0.0474576
cell surface	GO:0009986	GO:CC	0.00530066	380	158	14	0.0886076	0.0368421
positive regulation of attachment of spindle microtubules to kinetochore	GO:0051987	GO:BP	0.00534843	11	158	3	0.0189873	0.272727
cell-cell signaling	GO:0007267	GO:BP	0.00535819	614	158	19	0.120253	0.0309446
extracellular region	GO:0005576	GO:CC	0.00535836	2092	158	44	0.278481	0.0210325
animal organ morphogenesis	GO:0009887	GO:BP	0.0054571	565	158	18	0.113924	0.0318584
G0 and Early G1	REAC:R-HSA-1538133	REAC	0.00551996	25	158	4	0.0253165	0.16
osteoblast differentiation	GO:0001649	GO:BP	0.00559852	170	158	9	0.056962	0.0529412
apical part of cell	GO:0045177	GO:CC	0.00566018	254	158	11	0.0696203	0.0433071
regulation of reproductive process	GO:2000241	GO:BP	0.00581259	103	158	7	0.0443038	0.0679612
spindle microtubule	GO:0005876	GO:CC	0.00583251	77	158	6	0.0379747	0.0779221
meiosis I	GO:0007127	GO:BP	0.00598778	74	158	6	0.0379747	0.0810811
Spinal cord injury	WP:WP2431	WP	0.00606174	72	158	7	0.0443038	0.0972222
SKA complex	GO:0170027	GO:CC	0.00612705	3	158	2	0.0126582	0.666667
cellular response to toxic substance	GO:0097237	GO:BP	0.00640957	75	158	6	0.0379747	0.08
cell cycle G2/M phase transition	GO:0044839	GO:BP	0.00643568	138	158	8	0.0506329	0.057971
positive regulation of mitotic cytokinesis	GO:1903490	GO:BP	0.00667521	12	158	3	0.0189873	0.25
cellular response to macrophage colony-stimulating factor stimulus	GO:0036006	GO:BP	0.00667521	28	158	4	0.0253165	0.142857
icosanoid biosynthetic process	GO:0046456	GO:BP	0.00667521	28	158	4	0.0253165	0.142857
positive regulation of mitotic cell cycle spindle assembly checkpoint	GO:0090267	GO:BP	0.00667521	12	158	3	0.0189873	0.25
regulation of programmed cell death	GO:0043067	GO:BP	0.00667521	1004	158	26	0.164557	0.0258964
negative regulation of apoptotic process	GO:0043066	GO:BP	0.0069407	579	158	18	0.113924	0.0310881
Activation of APC/C and APC/C:Cdc20 mediated degradation of mitotic proteins	REAC:R-HSA-176814	REAC	0.00724555	74	158	6	0.0379747	0.0810811
blood circulation	GO:0008015	GO:BP	0.00736664	257	158	11	0.0696203	0.0428016
multi-organism reproductive process	GO:0044703	GO:BP	0.00736664	108	158	7	0.0443038	0.0648148
response to macrophage colony-stimulating factor	GO:0036005	GO:BP	0.0074211	29	158	4	0.0253165	0.137931
stem cell fate commitment	GO:0048865	GO:BP	0.0074211	3	158	2	0.0126582	0.666667
neural crest cell fate commitment	GO:0014034	GO:BP	0.0074211	3	158	2	0.0126582	0.666667
prostaglandin metabolic process	GO:0006693	GO:BP	0.0074211	29	158	4	0.0253165	0.137931
cyclooxygenase pathway	GO:0019371	GO:BP	0.0074211	3	158	2	0.0126582	0.666667
regulation of dopaminergic neuron differentiation	GO:1904338	GO:BP	0.0074211	3	158	2	0.0126582	0.666667
establishment of meiotic spindle orientation	GO:0051296	GO:BP	0.0074211	3	158	2	0.0126582	0.666667
regulation of mitotic cytokinesis	GO:1902412	GO:BP	0.00809573	13	158	3	0.0189873	0.230769
meiotic spindle assembly	GO:0090306	GO:BP	0.00809573	13	158	3	0.0189873	0.230769
meiotic cell cycle phase transition	GO:0044771	GO:BP	0.00809573	13	158	3	0.0189873	0.230769
cell projection	GO:0042995	GO:CC	0.008125	1511	158	34	0.21519	0.0225017
trabecula morphogenesis	GO:0061383	GO:BP	0.00820427	30	158	4	0.0253165	0.133333
protein phosphorylation	GO:0006468	GO:BP	0.00820427	694	158	20	0.126582	0.0288184
negative regulation of signal transduction	GO:0009968	GO:BP	0.00820708	967	158	25	0.158228	0.0258532
apical plasma membrane	GO:0016324	GO:CC	0.00831993	188	158	9	0.056962	0.0478723
multi-multicellular organism process	GO:0044706	GO:BP	0.00861268	112	158	7	0.0443038	0.0625
regulation of apoptotic process	GO:0042981	GO:BP	0.00877602	972	158	25	0.158228	0.0257202
circulatory system development	GO:0072359	GO:BP	0.00878535	752	158	21	0.132911	0.0279255
Mitotic checkpoint complex (MCC)	CORUM:190	CORUM	0.00888009	4	158	2	0.0126582	0.5
nitric oxide metabolic process	GO:0046209	GO:BP	0.00901559	54	158	5	0.0316456	0.0925926
prostanoid metabolic process	GO:0006692	GO:BP	0.00902861	31	158	4	0.0253165	0.129032
positive regulation of cytokinesis	GO:0032467	GO:BP	0.00902861	31	158	4	0.0253165	0.129032
angiogenesis	GO:0001525	GO:BP	0.00923646	355	158	13	0.0822785	0.0366197
circulatory system process	GO:0003013	GO:BP	0.00942384	311	158	12	0.0759494	0.0385852
reactive nitrogen species metabolic process	GO:2001057	GO:BP	0.00961058	55	158	5	0.0316456	0.0909091
vasculature development	GO:0001944	GO:BP	0.00961794	500	158	16	0.101266	0.032
positive regulation of interleukin-1 beta production	GO:0032731	GO:BP	0.00984114	32	158	4	0.0253165	0.125
chromosome condensation	GO:0030261	GO:BP	0.00984114	32	158	4	0.0253165	0.125
regulation of response to stimulus	GO:0048583	GO:BP	0.00984114	2613	158	51	0.322785	0.0195178
unsaturated fatty acid biosynthetic process	GO:0006636	GO:BP	0.00984114	32	158	4	0.0253165	0.125
collagen-activated signaling pathway	GO:0038065	GO:BP	0.00984114	32	158	4	0.0253165	0.125
COPI-dependent Golgi-to-ER retrograde traffic	REAC:R-HSA-6811434	REAC	0.00994793	79	158	6	0.0379747	0.0759494
detection of stimulus	GO:0051606	GO:BP	0.00995549	84	158	6	0.0379747	0.0714286
cellular component organization or biogenesis	GO:0071840	GO:BP	0.010005	4833	158	82	0.518987	0.0169667
negative regulation of programmed cell death	GO:0043069	GO:BP	0.0100775	605	158	18	0.113924	0.0297521
gamete generation	GO:0007276	GO:BP	0.0101007	407	158	14	0.0886076	0.034398
anatomical structure morphogenesis	GO:0009653	GO:BP	0.0102309	1645	158	36	0.227848	0.0218845
NSAIDs mechanism of action	WP:WP5513	WP	0.0105888	2	158	2	0.0126582	1
Arachidonic acid AA ARA oxylipin metabolism	WP:WP5155	WP	0.0105888	2	158	2	0.0126582	1
Prostaglandin and leukotriene metabolism in senescence	WP:WP5122	WP	0.0105888	23	158	4	0.0253165	0.173913
Cancer pathways	WP:WP5434	WP	0.0105888	351	158	14	0.0886076	0.039886
cellular response to fibroblast growth factor stimulus	GO:0044344	GO:BP	0.0110518	86	158	6	0.0379747	0.0697674
Eicosanoid synthesis	WP:WP167	WP	0.0110869	10	158	3	0.0189873	0.3
mitotic checkpoint complex	GO:0033597	GO:CC	0.0111917	4	158	2	0.0126582	0.5
hair follicle morphogenesis	GO:0031069	GO:BP	0.0112517	15	158	3	0.0189873	0.2
response to mineralocorticoid	GO:0051385	GO:BP	0.0112517	15	158	3	0.0189873	0.2
protein localization to kinetochore	GO:0034501	GO:BP	0.0112517	15	158	3	0.0189873	0.2
protein localization to condensed chromosome	GO:1903083	GO:BP	0.0112517	15	158	3	0.0189873	0.2
superoxide metabolic process	GO:0006801	GO:BP	0.0119076	34	158	4	0.0253165	0.117647
Omega 3 fatty acids in senescence	WP:WP5432	WP	0.0121002	11	158	3	0.0189873	0.272727
Omega 6 fatty acids in senescence	WP:WP5424	WP	0.0121002	27	158	4	0.0253165	0.148148
Prostaglandin synthesis and regulation	WP:WP98	WP	0.0121002	27	158	4	0.0253165	0.148148
negative regulation of mitotic spindle assembly checkpoint signaling	GO:0140499	GO:BP	0.0123429	4	158	2	0.0126582	0.5
central nervous system development	GO:0007417	GO:BP	0.0123429	619	158	18	0.113924	0.0290792
regulation of establishment of planar polarity	GO:0090175	GO:BP	0.0123429	4	158	2	0.0126582	0.5
negative regulation of spindle checkpoint	GO:0090233	GO:BP	0.0123429	4	158	2	0.0126582	0.5
gamma-aminobutyric acid metabolic process	GO:0009448	GO:BP	0.0123429	4	158	2	0.0126582	0.5
detection of lipopolysaccharide	GO:0032497	GO:BP	0.0123429	4	158	2	0.0126582	0.5
meiotic sister chromatid cohesion, centromeric	GO:0051754	GO:BP	0.0123429	4	158	2	0.0126582	0.5
regulation of renal sodium excretion	GO:0035813	GO:BP	0.0123429	4	158	2	0.0126582	0.5
response to luteinizing hormone	GO:0034699	GO:BP	0.0123429	4	158	2	0.0126582	0.5
establishment of cell polarity	GO:0030010	GO:BP	0.0123429	122	158	7	0.0443038	0.057377
Wnt signaling pathway, calcium modulating pathway	GO:0007223	GO:BP	0.0123429	4	158	2	0.0126582	0.5
regulation of anaphase-promoting complex-dependent catabolic process	GO:1905784	GO:BP	0.0123429	4	158	2	0.0126582	0.5
protein localization to chromosome	GO:0034502	GO:BP	0.0123519	89	158	6	0.0379747	0.0674157
KNL1-MIS12-NDC80-SPC24-ZWINT complex	CORUM:7542	CORUM	0.0125792	5	158	2	0.0126582	0.4
ASF1-interacting protein complex	CORUM:2235	CORUM	0.0125792	5	158	2	0.0126582	0.4
organelle organization	GO:0006996	GO:BP	0.0127164	2653	158	51	0.322785	0.0192235
response to external stimulus	GO:0009605	GO:BP	0.0127836	1303	158	30	0.189873	0.0230238
cellular response to vitamin D	GO:0071305	GO:BP	0.0128301	16	158	3	0.0189873	0.1875
regulation of cell differentiation	GO:0045595	GO:BP	0.0128301	952	158	24	0.151899	0.0252101
response to fibroblast growth factor	GO:0071774	GO:BP	0.0128575	90	158	6	0.0379747	0.0666667
phagocytic cup	GO:0001891	GO:CC	0.0135719	17	158	3	0.0189873	0.176471
plasma membrane bounded cell projection	GO:0120025	GO:CC	0.0135719	1441	158	32	0.202532	0.0222068
negative regulation of cell communication	GO:0010648	GO:BP	0.013807	1015	158	25	0.158228	0.0246305
negative regulation of signaling	GO:0023057	GO:BP	0.0141451	1017	158	25	0.158228	0.0245821
regulation of cell division	GO:0051302	GO:BP	0.0144271	126	158	7	0.0443038	0.0555556
blood vessel development	GO:0001568	GO:BP	0.0146002	477	158	15	0.0949367	0.0314465
plasma membrane	GO:0005886	GO:CC	0.0147795	2689	158	51	0.322785	0.0189662
Octadecanoid formation from linoleic acid	WP:WP5324	WP	0.0147864	3	158	2	0.0126582	0.666667
glomerulus vasculature development	GO:0072012	GO:BP	0.0148379	17	158	3	0.0189873	0.176471
epidermis morphogenesis	GO:0048730	GO:BP	0.0148379	17	158	3	0.0189873	0.176471
regulation of systemic arterial blood pressure by hormone	GO:0001990	GO:BP	0.0148379	17	158	3	0.0189873	0.176471
negative regulation of BMP signaling pathway	GO:0030514	GO:BP	0.0148379	37	158	4	0.0253165	0.108108
cell-substrate adhesion	GO:0031589	GO:BP	0.0148379	245	158	10	0.0632911	0.0408163
positive regulation of interleukin-1 production	GO:0032732	GO:BP	0.0148379	37	158	4	0.0253165	0.108108
negative regulation of cellular component organization	GO:0051129	GO:BP	0.014991	530	158	16	0.101266	0.0301887
Polo-like kinase mediated events	REAC:R-HSA-156711	REAC	0.0150951	15	158	3	0.0189873	0.2
Transcription of E2F targets under negative control by p107 (RBL1) and p130 (RBL2) in complex with HDAC1	REAC:R-HSA-1362300	REAC	0.0150951	15	158	3	0.0189873	0.2
Cell cycle	WP:WP179	WP	0.0153708	111	158	7	0.0443038	0.0630631
regulation of G2/M transition of mitotic cell cycle	GO:0010389	GO:BP	0.0154491	94	158	6	0.0379747	0.0638298
Pathways in cancer	KEGG:05200	KEGG	0.015586	360	158	14	0.0886076	0.0388889
Rheumatoid arthritis	KEGG:05323	KEGG	0.015586	44	158	5	0.0316456	0.113636
Primary focal segmental glomerulosclerosis FSGS	WP:WP2572	WP	0.0158784	54	158	5	0.0316456	0.0925926
system process	GO:0003008	GO:BP	0.0160532	914	158	23	0.14557	0.0251641
response to nitrogen compound	GO:1901698	GO:BP	0.0161039	586	158	17	0.107595	0.0290102
Regulation of sister chromatid separation at the metaphase anaphase transition	WP:WP4240	WP	0.0161936	14	158	3	0.0189873	0.214286
Interleukin-4 and Interleukin-13 signaling	REAC:R-HSA-6785807	REAC	0.0162396	60	158	5	0.0316456	0.0833333
G2 Phase	REAC:R-HSA-68911	REAC	0.0162396	4	158	2	0.0126582	0.5
Formation of the cornified envelope	REAC:R-HSA-6809371	REAC	0.0162396	16	158	3	0.0189873	0.1875
Uptake of dietary cobalamins into enterocytes	REAC:R-HSA-9758881	REAC	0.0162396	4	158	2	0.0126582	0.5
kidney development	GO:0001822	GO:BP	0.0162873	207	158	9	0.056962	0.0434783
Retinoblastoma gene in cancer	WP:WP2446	WP	0.0170095	85	158	6	0.0379747	0.0705882
regulation of meiotic nuclear division	GO:0040020	GO:BP	0.0171561	18	158	3	0.0189873	0.166667
muscle cell proliferation	GO:0033002	GO:BP	0.0171561	131	158	7	0.0443038	0.0534351
regulation of systemic arterial blood pressure mediated by a chemical signal	GO:0003044	GO:BP	0.0171561	18	158	3	0.0189873	0.166667
ASF1-histone containing complex	CORUM:2236	CORUM	0.0174629	6	158	2	0.0126582	0.333333
regulation of osteoclast differentiation	GO:0045670	GO:BP	0.0175598	39	158	4	0.0253165	0.102564
regulation of fat cell differentiation	GO:0045598	GO:BP	0.0176768	97	158	6	0.0379747	0.0618557
signaling receptor activity	GO:0038023	GO:MF	0.0177828	371	158	14	0.0886076	0.0377358
signaling receptor regulator activity	GO:0030545	GO:MF	0.0177828	188	158	10	0.0632911	0.0531915
collagen receptor activity	GO:0038064	GO:MF	0.0177828	25	158	4	0.0253165	0.16
molecular transducer activity	GO:0060089	GO:MF	0.0177828	371	158	14	0.0886076	0.0377358
epidermal growth factor receptor activity	GO:0005006	GO:MF	0.0177828	24	158	4	0.0253165	0.166667
polypeptide conformation or assembly isomerase activity	GO:0120544	GO:MF	0.0177828	70	158	6	0.0379747	0.0857143
cytoskeletal motor activity	GO:0003774	GO:MF	0.0177828	64	158	6	0.0379747	0.09375
female meiosis chromosome segregation	GO:0016321	GO:BP	0.0183443	5	158	2	0.0126582	0.4
regulation of excretion	GO:0044062	GO:BP	0.0183443	5	158	2	0.0126582	0.4
metaphase/anaphase transition of meiotic cell cycle	GO:0044785	GO:BP	0.0183443	5	158	2	0.0126582	0.4
cellular response to type II interferon	GO:0071346	GO:BP	0.0188365	67	158	5	0.0316456	0.0746269
regulation of nitric oxide biosynthetic process	GO:0045428	GO:BP	0.0188365	40	158	4	0.0253165	0.1
regulation of multicellular organismal process	GO:0051239	GO:BP	0.0188365	1718	158	36	0.227848	0.0209546
fat cell differentiation	GO:0045444	GO:BP	0.0188365	172	158	8	0.0506329	0.0465116
negative regulation of SMAD protein signal transduction	GO:0060392	GO:BP	0.0192327	19	158	3	0.0189873	0.157895
meiotic spindle organization	GO:0000212	GO:BP	0.0192327	19	158	3	0.0189873	0.157895
renal system vasculature development	GO:0061437	GO:BP	0.0192327	19	158	3	0.0189873	0.157895
kidney vasculature development	GO:0061440	GO:BP	0.0192327	19	158	3	0.0189873	0.157895
cellular response to vitamin	GO:0071295	GO:BP	0.0192327	19	158	3	0.0189873	0.157895
BMP signaling pathway	GO:0030509	GO:BP	0.019727	100	158	6	0.0379747	0.06
female pregnancy	GO:0007565	GO:BP	0.019727	100	158	6	0.0379747	0.06
regulation of nitric oxide metabolic process	GO:0080164	GO:BP	0.0200988	41	158	4	0.0253165	0.097561
phosphorylation	GO:0016310	GO:BP	0.0202571	766	158	20	0.126582	0.0261097
renal system development	GO:0072001	GO:BP	0.0202955	216	158	9	0.056962	0.0416667
cell surface receptor signaling pathway	GO:0007166	GO:BP	0.0203101	1666	158	35	0.221519	0.0210084
negative regulation of developmental process	GO:0051093	GO:BP	0.020347	551	158	16	0.101266	0.0290381
apical junction complex	GO:0043296	GO:CC	0.0206456	102	158	6	0.0379747	0.0588235
Phase I - Functionalization of compounds	REAC:R-HSA-211945	REAC	0.0210292	38	158	4	0.0253165	0.105263
negative regulation of cell differentiation	GO:0045596	GO:BP	0.02105	401	158	13	0.0822785	0.032419
multicellular organism development	GO:0007275	GO:BP	0.021083	2868	158	53	0.335443	0.0184798
enzyme-linked receptor protein signaling pathway	GO:0007167	GO:BP	0.021099	660	158	18	0.113924	0.0272727
hyaluronic acid binding	GO:0005540	GO:MF	0.0211586	12	158	3	0.0189873	0.25
signaling receptor binding	GO:0005102	GO:MF	0.0211586	679	158	20	0.126582	0.0294551
regulation of hormone levels	GO:0010817	GO:BP	0.0213682	262	158	10	0.0632911	0.0381679
regulation of osteoblast proliferation	GO:0033688	GO:BP	0.0213682	20	158	3	0.0189873	0.15
fibroblast growth factor receptor signaling pathway	GO:0008543	GO:BP	0.0213682	70	158	5	0.0316456	0.0714286
regulation of leukocyte chemotaxis	GO:0002688	GO:BP	0.0213682	70	158	5	0.0316456	0.0714286
positive regulation of cardiac muscle tissue growth	GO:0055023	GO:BP	0.0213682	20	158	3	0.0189873	0.15
regulation of cytoskeleton organization	GO:0051493	GO:BP	0.0214447	403	158	13	0.0822785	0.0322581
epidermis development	GO:0008544	GO:BP	0.0217804	178	158	8	0.0506329	0.0449438
response to stress	GO:0006950	GO:BP	0.0221852	2603	158	49	0.310127	0.0188244
Progesterone-mediated oocyte maturation	KEGG:04914	KEGG	0.0223821	77	158	6	0.0379747	0.0779221
positive regulation of multicellular organismal process	GO:0051240	GO:BP	0.0224315	947	158	23	0.14557	0.0242872
cellular detoxification	GO:1990748	GO:BP	0.0224315	71	158	5	0.0316456	0.0704225
regulation of cell cycle G2/M phase transition	GO:1902749	GO:BP	0.022685	104	158	6	0.0379747	0.0576923
prostaglandin-endoperoxide synthase activity	GO:0004666	GO:MF	0.0227517	3	158	2	0.0126582	0.666667
signaling receptor inhibitor activity	GO:0030547	GO:MF	0.0233558	13	158	3	0.0189873	0.230769
negative regulation of osteoclast differentiation	GO:0045671	GO:BP	0.02417	21	158	3	0.0189873	0.142857
renal sodium excretion	GO:0035812	GO:BP	0.0243356	6	158	2	0.0126582	0.333333
dorsal/ventral pattern formation	GO:0009953	GO:BP	0.0243356	44	158	4	0.0253165	0.0909091
glomerulus development	GO:0032835	GO:BP	0.0243356	44	158	4	0.0253165	0.0909091
DNA replication-dependent chromatin assembly	GO:0006335	GO:BP	0.0243356	6	158	2	0.0126582	0.333333
response to corticosterone	GO:0051412	GO:BP	0.0243356	6	158	2	0.0126582	0.333333
response to BMP	GO:0071772	GO:BP	0.0243807	106	158	6	0.0379747	0.0566038
cellular response to BMP stimulus	GO:0071773	GO:BP	0.0243807	106	158	6	0.0379747	0.0566038
response to lipid	GO:0033993	GO:BP	0.0245956	513	158	15	0.0949367	0.0292398
blood vessel morphogenesis	GO:0048514	GO:BP	0.0247778	412	158	13	0.0822785	0.0315534
positive regulation of cell migration	GO:0030335	GO:BP	0.0247778	363	158	12	0.0759494	0.0330579
carbohydrate derivative binding	GO:0097367	GO:MF	0.0249249	1566	158	35	0.221519	0.0223499
organelle assembly	GO:0070925	GO:BP	0.0254077	787	158	20	0.126582	0.025413
regulation of multicellular organismal development	GO:2000026	GO:BP	0.025788	845	158	21	0.132911	0.0248521
midbody abscission	GO:0061952	GO:BP	0.0265906	22	158	3	0.0189873	0.136364
positive regulation of heart growth	GO:0060421	GO:BP	0.0265906	22	158	3	0.0189873	0.136364
Ectoderm differentiation	WP:WP2858	WP	0.0270201	94	158	6	0.0379747	0.0638298
endocrine process	GO:0050886	GO:BP	0.0276888	46	158	4	0.0253165	0.0869565
localization	GO:0051179	GO:BP	0.0276888	3478	158	61	0.386076	0.0175388
REACTOME root term	REAC:0000000	REAC	0.0276919	7015	158	108	0.683544	0.0153956
Hematopoietic stem cell differentiation	WP:WP2849	WP	0.0280571	18	158	3	0.0189873	0.166667
Corticotropin releasing hormone signaling	WP:WP2355	WP	0.0280571	66	158	5	0.0316456	0.0757576
Acetaminophen in analgesia and antipyresis	WP:WP5444	WP	0.0280571	5	158	2	0.0126582	0.4
Placenta; cytotrophoblasts[≥Low]	HPA:0381191	HPA	0.0287104	416	158	16	0.101266	0.0384615
Placenta; cytotrophoblasts[≥Medium]	HPA:0381192	HPA	0.0287104	372	158	15	0.0949367	0.0403226
Eicosanoid metabolism via cyclooxygenases COX	WP:WP4719	WP	0.028792	19	158	3	0.0189873	0.157895
SUMOylation of DNA replication proteins	REAC:R-HSA-4615885	REAC	0.0289931	42	158	4	0.0253165	0.0952381
positive regulation of cell motility	GO:2000147	GO:BP	0.0290095	371	158	12	0.0759494	0.032345
zymogen activation	GO:0031638	GO:BP	0.0295176	23	158	3	0.0189873	0.130435
response to nicotine	GO:0035094	GO:BP	0.0295176	23	158	3	0.0189873	0.130435
vascular endothelial growth factor receptor-1 signaling pathway	GO:0036323	GO:BP	0.0295176	23	158	3	0.0189873	0.130435
response to vitamin D	GO:0033280	GO:BP	0.0295176	23	158	3	0.0189873	0.130435
response to amine	GO:0014075	GO:BP	0.0295176	23	158	3	0.0189873	0.130435
detection of mechanical stimulus	GO:0050982	GO:BP	0.0295176	23	158	3	0.0189873	0.130435
intercellular bridge	GO:0045171	GO:CC	0.0295235	76	158	5	0.0316456	0.0657895
response to type II interferon	GO:0034341	GO:BP	0.0295951	77	158	5	0.0316456	0.0649351
Histone H3.1 complex	CORUM:1149	CORUM	0.0300497	8	158	2	0.0126582	0.25
transmembrane receptor protein tyrosine kinase activity	GO:0004714	GO:MF	0.030209	33	158	4	0.0253165	0.121212
APC:Cdc20 mediated degradation of cell cycle proteins prior to satisfation of the cell cycle checkpoint	REAC:R-HSA-179419	REAC	0.0303132	71	158	5	0.0316456	0.0704225
mitotic nuclear membrane disassembly	GO:0007077	GO:BP	0.0305708	7	158	2	0.0126582	0.285714
chromosome movement towards spindle pole	GO:0051305	GO:BP	0.0305708	7	158	2	0.0126582	0.285714
positive regulation of platelet activation	GO:0010572	GO:BP	0.0305708	7	158	2	0.0126582	0.285714
positive regulation of fat cell differentiation	GO:0045600	GO:BP	0.0305708	48	158	4	0.0253165	0.0833333
forebrain development	GO:0030900	GO:BP	0.0305708	234	158	9	0.056962	0.0384615
regulation of ossification	GO:0030278	GO:BP	0.0305708	78	158	5	0.0316456	0.0641026
meiotic chromosome separation	GO:0051307	GO:BP	0.0305708	7	158	2	0.0126582	0.285714
glucose homeostasis	GO:0042593	GO:BP	0.0305708	150	158	7	0.0443038	0.0466667
cytokinetic process	GO:0032506	GO:BP	0.0305708	48	158	4	0.0253165	0.0833333
detection of molecule of bacterial origin	GO:0032490	GO:BP	0.0305708	7	158	2	0.0126582	0.285714
axonogenesis involved in innervation	GO:0060385	GO:BP	0.0305708	7	158	2	0.0126582	0.285714
bone trabecula formation	GO:0060346	GO:BP	0.0305708	7	158	2	0.0126582	0.285714
regulation of protein localization to cell cortex	GO:1904776	GO:BP	0.0305708	7	158	2	0.0126582	0.285714
negative regulation of cell cycle checkpoint	GO:1901977	GO:BP	0.0305708	7	158	2	0.0126582	0.285714
positive regulation of signaling	GO:0023056	GO:BP	0.0305708	1157	158	26	0.164557	0.0224719
prostaglandin secretion	GO:0032310	GO:BP	0.0305708	7	158	2	0.0126582	0.285714
positive regulation of developmental process	GO:0051094	GO:BP	0.0306762	806	158	20	0.126582	0.0248139
Arachidonate metabolism	REAC:R-HSA-2142753	REAC	0.0312817	21	158	3	0.0189873	0.142857
Mitotic G2-G2/M phases	REAC:R-HSA-453274	REAC	0.0312817	181	158	8	0.0506329	0.0441989
skin development	GO:0043588	GO:BP	0.031408	152	158	7	0.0443038	0.0460526
negative regulation of MAPK cascade	GO:0043409	GO:BP	0.031496	114	158	6	0.0379747	0.0526316
positive regulation of protein-containing complex disassembly	GO:0043243	GO:BP	0.031496	24	158	3	0.0189873	0.125
positive regulation of G2/M transition of mitotic cell cycle	GO:0010971	GO:BP	0.031496	24	158	3	0.0189873	0.125
APC/C:Cdc20 mediated degradation of mitotic proteins	REAC:R-HSA-176409	REAC	0.0317568	73	158	5	0.0316456	0.0684932
positive regulation of locomotion	GO:0040017	GO:BP	0.031797	379	158	12	0.0759494	0.0316623
regulation of interleukin-1 beta production	GO:0032651	GO:BP	0.0319315	49	158	4	0.0253165	0.0816327
interleukin-1 beta production	GO:0032611	GO:BP	0.0319315	49	158	4	0.0253165	0.0816327
cellular response to cytokine stimulus	GO:0071345	GO:BP	0.0320232	534	158	15	0.0949367	0.0280899
Duodenum; endocrine cells[≥Low]	HPA:0151291	HPA	0.032201	304	158	13	0.0822785	0.0427632
detoxification	GO:0098754	GO:BP	0.0324373	80	158	5	0.0316456	0.0625
regulation of blood pressure	GO:0008217	GO:BP	0.0324373	80	158	5	0.0316456	0.0625
carbohydrate homeostasis	GO:0033500	GO:BP	0.0328722	154	158	7	0.0443038	0.0454545
TP53 Regulates Transcription of Cell Cycle Genes	REAC:R-HSA-6791312	REAC	0.0330061	45	158	4	0.0253165	0.0888889
nitric oxide biosynthetic process	GO:0006809	GO:BP	0.03361	50	158	4	0.0253165	0.08
regulation of cell-substrate adhesion	GO:0010810	GO:BP	0.03361	155	158	7	0.0443038	0.0451613
sensory perception of mechanical stimulus	GO:0050954	GO:BP	0.03361	81	158	5	0.0316456	0.0617284
Wnt signaling pathway	GO:0016055	GO:BP	0.03361	334	158	11	0.0696203	0.0329341
peptidyl-tyrosine phosphorylation	GO:0018108	GO:BP	0.03361	81	158	5	0.0316456	0.0617284
positive regulation of protein localization to nucleus	GO:1900182	GO:BP	0.03361	81	158	5	0.0316456	0.0617284
tube development	GO:0035295	GO:BP	0.0338799	703	158	18	0.113924	0.0256046
positive regulation of vascular associated smooth muscle cell proliferation	GO:1904707	GO:BP	0.0339491	25	158	3	0.0189873	0.12
osteoblast proliferation	GO:0033687	GO:BP	0.0339491	25	158	3	0.0189873	0.12
clathrin-coated endocytic vesicle	GO:0045334	GO:CC	0.0352012	49	158	4	0.0253165	0.0816327
positive regulation of smooth muscle cell proliferation	GO:0048661	GO:BP	0.0354195	51	158	4	0.0253165	0.0784314
detection of abiotic stimulus	GO:0009582	GO:BP	0.0354195	51	158	4	0.0253165	0.0784314
detection of external stimulus	GO:0009581	GO:BP	0.0354195	51	158	4	0.0253165	0.0784314
cellular response to nitrogen compound	GO:1901699	GO:BP	0.0359167	438	158	13	0.0822785	0.0296804
cellular response to endogenous stimulus	GO:0071495	GO:BP	0.0363319	823	158	20	0.126582	0.0243013
peptidyl-tyrosine modification	GO:0018212	GO:BP	0.0364587	83	158	5	0.0316456	0.060241
dorsal/ventral axis specification	GO:0009950	GO:BP	0.0367753	8	158	2	0.0126582	0.25
peptidyl-tyrosine autophosphorylation	GO:0038083	GO:BP	0.0367753	8	158	2	0.0126582	0.25
sensory perception	GO:0007600	GO:BP	0.0367753	201	158	8	0.0506329	0.039801
positive regulation of organ growth	GO:0046622	GO:BP	0.0367753	26	158	3	0.0189873	0.115385
response to stem cell factor	GO:0036215	GO:BP	0.0367753	26	158	3	0.0189873	0.115385
cellular response to stem cell factor stimulus	GO:0036216	GO:BP	0.0367753	26	158	3	0.0189873	0.115385
macrophage colony-stimulating factor signaling pathway	GO:0038145	GO:BP	0.0367753	26	158	3	0.0189873	0.115385
icosanoid metabolic process	GO:0006690	GO:BP	0.0367753	52	158	4	0.0253165	0.0769231
Kit signaling pathway	GO:0038109	GO:BP	0.0367753	26	158	3	0.0189873	0.115385
prostaglandin transport	GO:0015732	GO:BP	0.0367753	8	158	2	0.0126582	0.25
positive regulation of response to stimulus	GO:0048584	GO:BP	0.0372423	1498	158	31	0.196203	0.0206943
cellular response to glucose stimulus	GO:0071333	GO:BP	0.0372423	84	158	5	0.0316456	0.0595238
Golgi-to-ER retrograde transport	REAC:R-HSA-8856688	REAC	0.0377718	111	158	6	0.0379747	0.0540541
Activation of NIMA Kinases NEK9, NEK6, NEK7	REAC:R-HSA-2980767	REAC	0.0386008	7	158	2	0.0126582	0.285714
Regulation of APC/C activators between G1/S and early anaphase	REAC:R-HSA-176408	REAC	0.0386008	78	158	5	0.0316456	0.0641026
Negative regulation of TCF-dependent signaling by WNT ligand antagonists	REAC:R-HSA-3772470	REAC	0.0386008	7	158	2	0.0126582	0.285714
tetrapyrrole binding	GO:0046906	GO:MF	0.0386603	61	158	5	0.0316456	0.0819672
Endochondral ossification with skeletal dysplasias	WP:WP4808	WP	0.0390625	45	158	4	0.0253165	0.0888889
Endochondral ossification	WP:WP474	WP	0.0390625	45	158	4	0.0253165	0.0888889
sister chromatid cohesion	GO:0007062	GO:BP	0.0390979	53	158	4	0.0253165	0.0754717
brain development	GO:0007420	GO:BP	0.0392033	445	158	13	0.0822785	0.0292135
proteolysis	GO:0006508	GO:BP	0.0392033	445	158	13	0.0822785	0.0292135
response to endogenous stimulus	GO:0009719	GO:BP	0.0392033	949	158	22	0.139241	0.0231823
hsa-mir-152-3p	MIRNA:hsa-mir-152-3p	MIRNA	0.0396707	107	158	8	0.0506329	0.0747664
hsa-mir-193b-3p	MIRNA:hsa-mir-193b-3p	MIRNA	0.0396707	736	158	23	0.14557	0.03125
positive regulation of smooth muscle cell migration	GO:0014911	GO:BP	0.0397207	27	158	3	0.0189873	0.111111
positive regulation of cell cycle G2/M phase transition	GO:1902751	GO:BP	0.0397207	27	158	3	0.0189873	0.111111
epithelial cell differentiation involved in kidney development	GO:0035850	GO:BP	0.0397207	27	158	3	0.0189873	0.111111
positive regulation of nitric oxide biosynthetic process	GO:0045429	GO:BP	0.0397207	27	158	3	0.0189873	0.111111
cellular component disassembly	GO:0022411	GO:BP	0.0397322	345	158	11	0.0696203	0.0318841
cellular response to hexose stimulus	GO:0071331	GO:BP	0.0401795	86	158	5	0.0316456	0.0581395
hormone secretion	GO:0046879	GO:BP	0.0406851	163	158	7	0.0443038	0.0429448
pallium development	GO:0021543	GO:BP	0.0406851	123	158	6	0.0379747	0.0487805
kidney epithelium development	GO:0072073	GO:BP	0.0415998	87	158	5	0.0316456	0.0574713
cellular component assembly	GO:0022607	GO:BP	0.0415998	2304	158	43	0.272152	0.0186632
cellular response to monosaccharide stimulus	GO:0071326	GO:BP	0.0415998	87	158	5	0.0316456	0.0574713
cerebral cortex development	GO:0021987	GO:BP	0.0415998	87	158	5	0.0316456	0.0574713
receptor ligand activity	GO:0048018	GO:MF	0.0418169	167	158	8	0.0506329	0.0479042
adenyl nucleotide binding	GO:0030554	GO:MF	0.0418169	1207	158	28	0.177215	0.023198
transmembrane signaling receptor activity	GO:0004888	GO:MF	0.0418169	249	158	10	0.0632911	0.0401606
system development	GO:0048731	GO:BP	0.0424975	2444	158	45	0.28481	0.0184124
platelet-derived growth factor receptor-alpha signaling pathway	GO:0035790	GO:BP	0.0428356	28	158	3	0.0189873	0.107143
lipid export from cell	GO:0140353	GO:BP	0.0428356	28	158	3	0.0189873	0.107143
brain-derived neurotrophic factor receptor signaling pathway	GO:0031547	GO:BP	0.0428356	28	158	3	0.0189873	0.107143
blood vessel endothelial cell migration	GO:0043534	GO:BP	0.0431498	88	158	5	0.0316456	0.0568182
positive regulation of macromolecule metabolic process	GO:0010604	GO:BP	0.043182	2176	158	41	0.259494	0.0188419
hormone transport	GO:0009914	GO:BP	0.0431982	166	158	7	0.0443038	0.0421687
cellular response to gonadotropin stimulus	GO:0071371	GO:BP	0.0431982	9	158	2	0.0126582	0.222222
regulation of molecular function	GO:0065009	GO:BP	0.0431982	728	158	18	0.113924	0.0247253
bone trabecula morphogenesis	GO:0061430	GO:BP	0.0431982	9	158	2	0.0126582	0.222222
midbrain dopaminergic neuron differentiation	GO:1904948	GO:BP	0.0431982	9	158	2	0.0126582	0.222222
heart trabecula formation	GO:0060347	GO:BP	0.0431982	9	158	2	0.0126582	0.222222
negative regulation of stress-activated MAPK cascade	GO:0032873	GO:BP	0.0431982	9	158	2	0.0126582	0.222222
regulation of odontogenesis	GO:0042481	GO:BP	0.0431982	9	158	2	0.0126582	0.222222
renal tubular secretion	GO:0097254	GO:BP	0.0431982	9	158	2	0.0126582	0.222222
positive regulation of ubiquitin protein ligase activity	GO:1904668	GO:BP	0.0431982	9	158	2	0.0126582	0.222222
bicellular tight junction	GO:0005923	GO:CC	0.0434533	84	158	5	0.0316456	0.0595238
extracellular space	GO:0005615	GO:CC	0.0435418	1758	158	35	0.221519	0.019909
Aspirin and miRNAs	WP:WP4707	WP	0.0438171	7	158	2	0.0126582	0.285714
Burn wound healing	WP:WP5055	WP	0.0438171	48	158	4	0.0253165	0.0833333
Network map of SARS CoV 2 signaling	WP:WP5115	WP	0.0438171	151	158	7	0.0443038	0.0463576
DNA IR damage and cellular response via ATR	WP:WP4016	WP	0.0438171	79	158	5	0.0316456	0.0632911
regulation of interleukin-1 production	GO:0032652	GO:BP	0.0439513	56	158	4	0.0253165	0.0714286
hair follicle development	GO:0001942	GO:BP	0.0439513	56	158	4	0.0253165	0.0714286
interleukin-1 production	GO:0032612	GO:BP	0.0439513	56	158	4	0.0253165	0.0714286
Nicotinate metabolism	REAC:R-HSA-196807	REAC	0.0443484	25	158	3	0.0189873	0.12
regulation of developmental process	GO:0050793	GO:BP	0.0444664	1525	158	31	0.196203	0.0203279
RC complex during G2/M-phase of cell cycle	CORUM:1005	CORUM	0.0446957	10	158	2	0.0126582	0.2
positive regulation of supramolecular fiber organization	GO:1902905	GO:BP	0.0448068	127	158	6	0.0379747	0.0472441
collagen-activated tyrosine kinase receptor signaling pathway	GO:0038063	GO:BP	0.0454201	29	158	3	0.0189873	0.103448
boss receptor activity	GO:0008288	GO:MF	0.0454409	23	158	3	0.0189873	0.130435
adenyl ribonucleotide binding	GO:0032559	GO:MF	0.0454409	1139	158	26	0.164557	0.022827
transmembrane receptor protein kinase activity	GO:0019199	GO:MF	0.0454409	48	158	4	0.0253165	0.0833333
brain-derived neurotrophic factor receptor activity	GO:0060175	GO:MF	0.0454409	23	158	3	0.0189873	0.130435
receptor antagonist activity	GO:0048019	GO:MF	0.0454409	7	158	2	0.0126582	0.285714
NAD+ nucleosidase activity, cyclic ADP-ribose generating	GO:0061809	GO:MF	0.0454409	6	158	2	0.0126582	0.333333
signaling receptor activator activity	GO:0030546	GO:MF	0.0454409	174	158	8	0.0506329	0.045977
protein tyrosine kinase collagen receptor activity	GO:0038062	GO:MF	0.0454409	23	158	3	0.0189873	0.130435
placental growth factor receptor activity	GO:0036332	GO:MF	0.0454409	23	158	3	0.0189873	0.130435
platelet-derived growth factor beta-receptor activity	GO:0005019	GO:MF	0.0454409	24	158	3	0.0189873	0.125
platelet-derived growth factor alpha-receptor activity	GO:0005018	GO:MF	0.0454409	23	158	3	0.0189873	0.130435
endopeptidase regulator activity	GO:0061135	GO:MF	0.0454409	79	158	5	0.0316456	0.0632911
cytoskeletal protein binding	GO:0008092	GO:MF	0.0454409	691	158	18	0.113924	0.0260492
insulin receptor activity	GO:0005009	GO:MF	0.0454409	23	158	3	0.0189873	0.130435
macromolecular conformation isomerase activity	GO:0120543	GO:MF	0.0454409	226	158	9	0.056962	0.039823
macrophage colony-stimulating factor receptor activity	GO:0005011	GO:MF	0.0454409	23	158	3	0.0189873	0.130435
platelet-derived growth factor receptor activity	GO:0005017	GO:MF	0.0454409	24	158	3	0.0189873	0.125
neurotrophin receptor activity	GO:0005030	GO:MF	0.0454409	24	158	3	0.0189873	0.125
stem cell factor receptor activity	GO:0005020	GO:MF	0.0454409	23	158	3	0.0189873	0.130435
GPI-linked ephrin receptor activity	GO:0005004	GO:MF	0.0454409	23	158	3	0.0189873	0.130435
oxidoreductase activity, acting on single donors with incorporation of molecular oxygen, incorporation of two atoms of oxygen	GO:0016702	GO:MF	0.0454409	6	158	2	0.0126582	0.333333
endopeptidase activity	GO:0004175	GO:MF	0.0454409	189	158	8	0.0506329	0.042328
oxidoreductase activity, acting on single donors with incorporation of molecular oxygen	GO:0016701	GO:MF	0.0454409	6	158	2	0.0126582	0.333333
hepatocyte growth factor receptor activity	GO:0005008	GO:MF	0.0454409	23	158	3	0.0189873	0.130435
fibroblast growth factor receptor activity	GO:0005007	GO:MF	0.0454409	24	158	3	0.0189873	0.125
glycosaminoglycan binding	GO:0005539	GO:MF	0.0454409	114	158	6	0.0379747	0.0526316
cellular response to carbohydrate stimulus	GO:0071322	GO:BP	0.0455197	90	158	5	0.0316456	0.0555556
CRM1-Survivin mitotic complex	CORUM:1117	CORUM	0.0455289	2	158	1	0.00632911	0.5
PTGS2 homodimer complex	CORUM:1439	CORUM	0.0455289	1	158	1	0.00632911	1
CEN complex	CORUM:929	CORUM	0.0455289	32	158	3	0.0189873	0.09375
Kv4.2-DPP10 channel complex	CORUM:595	CORUM	0.0455289	1	158	1	0.00632911	1
RalBP1-CDC2-CCNB1 complex	CORUM:243	CORUM	0.0455289	2	158	1	0.00632911	0.5
TRAF6-MALT1 complex	CORUM:2743	CORUM	0.0455289	2	158	1	0.00632911	0.5
AURKB-VRK1 complex	CORUM:7101	CORUM	0.0455289	2	158	1	0.00632911	0.5
CLIC5A-EZR-PODXL complex	CORUM:6783	CORUM	0.0455289	1	158	1	0.00632911	1
E2F-1-DP-1-cyclinA-CDK2 complex	CORUM:6589	CORUM	0.0455289	2	158	1	0.00632911	0.5
CCNB1-CDC2 complex	CORUM:5543	CORUM	0.0455289	1	158	1	0.00632911	1
SMAD6-HOXC8 complex	CORUM:4089	CORUM	0.0455289	2	158	1	0.00632911	0.5
SMAD6-HOXA9 complex	CORUM:4090	CORUM	0.0455289	1	158	1	0.00632911	1
RB-E2F1 complex	CORUM:5143	CORUM	0.0455289	2	158	1	0.00632911	0.5
CCNB2-CDC2 complex	CORUM:5542	CORUM	0.0455289	2	158	1	0.00632911	0.5
ITGA11-ITGB1 complex	CORUM:3058	CORUM	0.0455289	2	158	1	0.00632911	0.5
CEBPE-E2F1-RB1 complex	CORUM:5656	CORUM	0.0455289	2	158	1	0.00632911	0.5
CDC2-PCNA-CCNB1-GADD45A complex	CORUM:5544	CORUM	0.0455289	2	158	1	0.00632911	0.5
CDC2-PCNA-CCNB1-GADD45B complex	CORUM:5545	CORUM	0.0455289	2	158	1	0.00632911	0.5
CDC2-CCNB1-PTCH1 complex	CORUM:5551	CORUM	0.0455289	2	158	1	0.00632911	0.5
CDK2-CCNA2 complex	CORUM:5556	CORUM	0.0455289	1	158	1	0.00632911	1
CDC2-PCNA-CCNB1-GADD45G complex	CORUM:5546	CORUM	0.0455289	1	158	1	0.00632911	1
CDK1-CCNB1-CCNF complex	CORUM:5550	CORUM	0.0455289	2	158	1	0.00632911	0.5
PPP1R13L-CEP55 complex	CORUM:7422	CORUM	0.0455289	2	158	1	0.00632911	0.5
MAD2-CDC20 complex	CORUM:2718	CORUM	0.0455289	2	158	1	0.00632911	0.5
ETS2-FOS-JUN complex	CORUM:2695	CORUM	0.0455289	2	158	1	0.00632911	0.5
ERG-JUN-FOS DNA-protein complex	CORUM:2694	CORUM	0.0455289	2	158	1	0.00632911	0.5
TRAF2-MALT1 complex	CORUM:2744	CORUM	0.0455289	2	158	1	0.00632911	0.5
CARMA1-BCL10-MALT1 complex	CORUM:2752	CORUM	0.0455289	2	158	1	0.00632911	0.5
FYB-CARMA1-BCL-10-MALT1 complex	CORUM:2753	CORUM	0.0455289	2	158	1	0.00632911	0.5
RB-E2F1 complex	CORUM:1250	CORUM	0.0455289	2	158	1	0.00632911	0.5
E2F-1-DP-1 complex	CORUM:6588	CORUM	0.0455289	2	158	1	0.00632911	0.5
Survivin homodimer complex	CORUM:2580	CORUM	0.0455289	1	158	1	0.00632911	1
RasGAP-AURKA-survivin complex	CORUM:2581	CORUM	0.0455289	2	158	1	0.00632911	0.5
NFAT-JUN-FOS DNA-protein complex	CORUM:2693	CORUM	0.0455289	2	158	1	0.00632911	0.5
BUB1-BUB3 complex	CORUM:1851	CORUM	0.0455289	2	158	1	0.00632911	0.5
NEK2-NEK11 complex	CORUM:1932	CORUM	0.0455289	2	158	1	0.00632911	0.5
MALT1 homo-oligomer complex	CORUM:2051	CORUM	0.0455289	1	158	1	0.00632911	1
BCL10-MALT1 complex	CORUM:2053	CORUM	0.0455289	2	158	1	0.00632911	0.5
Shc-ERalpha-IGF-1R complex	CORUM:6251	CORUM	0.0455289	1	158	1	0.00632911	1
CENP-A-histone H4 heterodimer- HJURP complex	CORUM:7413	CORUM	0.0455289	1	158	1	0.00632911	1
CD44-ERK1-ERK2-RHAMM complex	CORUM:7504	CORUM	0.0455289	2	158	1	0.00632911	0.5
RHAMM-beta-catenin complex	CORUM:6359	CORUM	0.0455289	2	158	1	0.00632911	0.5
ESPL1-CDC2 complex	CORUM:5643	CORUM	0.0455289	2	158	1	0.00632911	0.5
NLRP1 inflammasome	CORUM:6317	CORUM	0.0455289	2	158	1	0.00632911	0.5
END1-ENDRA complex	CORUM:7309	CORUM	0.0455289	1	158	1	0.00632911	1
positive regulation of cell communication	GO:0010647	GO:BP	0.0456158	1151	158	25	0.158228	0.0217202
signal release	GO:0023061	GO:BP	0.0456193	258	158	9	0.056962	0.0348837
peptide hormone secretion	GO:0030072	GO:BP	0.0459737	128	158	6	0.0379747	0.046875
smooth muscle cell migration	GO:0014909	GO:BP	0.0459737	57	158	4	0.0253165	0.0701754
transmembrane-ephrin receptor activity	GO:0005005	GO:MF	0.0460732	25	158	3	0.0189873	0.12
ephrin receptor activity	GO:0005003	GO:MF	0.0460732	25	158	3	0.0189873	0.12
vascular endothelial growth factor receptor activity	GO:0005021	GO:MF	0.0460732	25	158	3	0.0189873	0.12
insulin-like growth factor receptor activity	GO:0005010	GO:MF	0.0460732	25	158	3	0.0189873	0.12
hydrolase activity, hydrolyzing N-glycosyl compounds	GO:0016799	GO:MF	0.0460732	25	158	3	0.0189873	0.12
sprouting angiogenesis	GO:0002040	GO:BP	0.0471511	91	158	5	0.0316456	0.0549451
ATP binding	GO:0005524	GO:MF	0.0475897	1117	158	25	0.158228	0.0223814
APC-Cdc20 mediated degradation of Nek2A	REAC:R-HSA-179409	REAC	0.0476398	26	158	3	0.0189873	0.115385
G1/S-Specific Transcription	REAC:R-HSA-69205	REAC	0.0476398	26	158	3	0.0189873	0.115385
unsaturated fatty acid metabolic process	GO:0033559	GO:BP	0.0484655	58	158	4	0.0253165	0.0689655
molting cycle process	GO:0022404	GO:BP	0.0484655	58	158	4	0.0253165	0.0689655
hair cycle process	GO:0022405	GO:BP	0.0484655	58	158	4	0.0253165	0.0689655
regulation of localization	GO:0032879	GO:BP	0.0487871	1221	158	26	0.164557	0.021294
peptide secretion	GO:0002790	GO:BP	0.0487871	130	158	6	0.0379747	0.0461538
anaphase-promoting complex binding	GO:0010997	GO:MF	0.0492432	8	158	2	0.0126582	0.25
ATP-dependent activity	GO:0140657	GO:MF	0.0492432	441	158	13	0.0822785	0.0294785
telencephalon development	GO:0021537	GO:BP	0.0497405	172	158	7	0.0443038	0.0406977
response to external biotic stimulus	GO:0043207	GO:BP	0.0498315	859	158	20	0.126582	0.0232829
response to other organism	GO:0051707	GO:BP	0.0498315	859	158	20	0.126582	0.0232829
